# Hepatic Gene Expression Profiling Reveals Key Pathways Involved in Leptin-Mediated Weight Loss in *ob/ob* Mice

Ashok Sharma<sup>1,3</sup>, Shoshana M. Bartell<sup>2,3</sup>, Clifton A. Baile<sup>2</sup>, Bo Chen<sup>1</sup>, Robert H. Podolsky<sup>1,3</sup>, Richard A. McIndoe<sup>1,4</sup>, Jin-Xiong She<sup>1,4\*</sup>

**1** Center for Biotechnology and Genomic Medicine, School of Medicine, Medical College of Georgia, Augusta, Georgia, United States of America, **2** Animal & Dairy Science, University of Georgia, Athens, Georgia, United States of America, **3** Department of Medicine, School of Medicine, Medical College of Georgia, Augusta, Georgia, United States of America, **4** Department of Pathology, School of Medicine, Medical College of Georgia, Augusta, Georgia, United States of America

## Abstract

**Background:** Leptin, a cytokine-like protein, plays an important role in the regulation of body weight through inhibition of food intake and stimulation of energy expenditure. Leptin circulates in blood and acts on the brain, which sends downstream signals to regulate body weight. Leptin therapy has been successful in treating leptin deficient obese patients. However, high levels of leptin have been observed in more common forms of obesity indicating a state of leptin resistance which limits the application of leptin in the treatment of obesity. If the central effect of leptin could be by-passed and genes which respond to leptin treatment could be regulated directly, new therapeutic targets for the treatment of obesity may be possible. The purpose of this study was to identify genes and subsequent pathways correlated with leptin-mediated weight loss.

**Methodology/Principal Findings:** We utilized microarray technology to compare hepatic gene expression changes after two types of leptin administration: one involving a direct stimulatory effect when administered peripherally (subcutaneous: SQ) and another that is indirect, involving a hypothalamic relay that suppresses food intake when leptin is administered centrally (intracerebroventricular: ICV). We identified 214 genes that correlate with leptin mediated weight loss. Several biological processes such as mitochondrial metabolic pathways, lipid metabolic and catabolic processes, lipid biosynthetic processes, carboxylic acid metabolic processes, iron ion binding and glutathione S-transferases were downregulated after leptin administration. In contrast, genes involved in the immune system inflammatory response and lysosomal activity were found to be upregulated. Among the cellular compartments mitochondrion (32 genes), endoplasmic reticulum (22 genes) and vacuole (8 genes) were significantly over represented.

**Conclusions/Significance:** In this study we have identified key molecular pathways and downstream genes which respond to leptin treatment and are involved in leptin-mediated weight loss. Many of these genes have previously been shown to be associated with obesity; however, we have also identified a number of other novel target genes. Further investigation will be required to assess the possible use of these genes and their associated protein products as therapeutic targets for the treatment of obesity.

**Citation:** Sharma A, Bartell SM, Baile CA, Chen B, Podolsky RH, et al. (2010) Hepatic Gene Expression Profiling Reveals Key Pathways Involved in Leptin-Mediated Weight Loss in *ob/ob* Mice. PLoS ONE 5(8): e12147. doi:10.1371/journal.pone.0012147

**Editor:** I. King Jordan, Georgia Institute of Technology, United States of America

**Received:** May 7, 2010; **Accepted:** July 8, 2010; **Published:** August 16, 2010

**Copyright:** © 2010 Sharma et al. This is an open-access article distributed under the terms of the Creative Commons Attribution License, which permits unrestricted use, distribution, and reproduction in any medium, provided the original author and source are credited.

**Funding:** This study was supported by the Georgia Research Alliance (GRA, <http://www.gra.org/>) Eminent Scholar endowment and two GRA Challenge Grants to JXS and CAB. The funders had no role in study design, data collection and analysis, decision to publish, or preparation of the manuscript.

**Competing Interests:** The authors have declared that no competing interests exist.

\* E-mail: jshe@mail.mcg.edu

These authors contributed equally to this work.

## Introduction

Leptin, a cytokine-like protein containing 167 amino acids that is predominantly expressed in adipocytes, was discovered in 1994 by positional cloning of the obese (*ob*) gene [1]. Leptin plays a very important role in regulation of body weight and fat deposition through the inhibition of food intake and stimulation of energy expenditure [2]. Leptin-deficient (*ob/ob*) mice and leptin receptor-deficient (*db/db*) mice are severely obese, infertile and insulin resistant, have increased food intake, reduced body temperature and decreased energy expenditure, immune function and bone formation [3–5].

The liver has an integral role in lipid metabolism and also has significant energetic demands; therefore, studies have suggested that leptin's effect on metabolism may be mediated by the liver. Leptin-deficient mice have significant abnormalities in macronutrient metabolism, which can be corrected by leptin administration. A recent study has shown that acute leptin infusion rapidly reverses hepatic steatosis and plasma dyslipidemia induced by a high sucrose diet in rats [6], and the preservation of hepatic leptin action after a high sucrose diet is associated with the maintenance of low adiposity and plasma leptin concentrations.

Leptin therapy has been used to treat selected cases of both congenital and acquired leptin deficiencies in humans. Leptin

usually works as a negative-feedback signal regulating the mass of the adipose tissue. However, high levels of leptin have been observed in obese humans and rodents, suggesting the development of leptin resistance in these cases [7–10]. An important component in leptin resistance appears to be the development of defective leptin uptake into the brain, downregulation of leptin receptors and decreased leptin sensitivity. The molecular mechanism by which leptin reduces body weight has been partially elucidated. There is a need to have a precise understanding of the metabolic pathways affected by leptin deficiency or leptin resistance. Therefore, understanding the mechanisms by which leptin and its targets influence energy balance could lead to new therapeutic targets for obesity.

The purpose of this study was to identify the genes which respond to leptin treatment and subsequent pathways correlated with leptin-mediated weight loss. We utilized microarray technology to compare two types of leptin administration: one involving a direct stimulatory effect when administered peripherally (subcutaneous: SQ) and another that is indirect, involving a hypothalamic relay that suppresses food intake when leptin is administered centrally (intracerebroventricular: ICV). We report here the impact of central and peripheral administration of leptin on food intake, body weight and body fat composition in *ob/ob* mice. We also report hepatic gene expression changes caused by central versus peripheral leptin administration.

## Materials and Methods

### Animals and design

Leptin deficient (*ob/ob*) female mice (11 wk old) on the C57BL6 background were obtained from Jackson Laboratory (Bar Harbor, ME). These mice were housed 2 per cage in shoebox cages with food and water available *ad libitum*. Their health, body weight and food intake were monitored and recorded weekly for 4 wk as they adapted to the pellet diet (LabDiet 5010, PMI Nutrition International). At 15 wk of age, the mice were divided into four treatment groups such that the mean body weight between treatments was not statistically different. Two groups of ten mice each were subjected to the subcutaneous (SQ) treatment (vehicle and leptin) and two groups of ten mice each were subjected to the intracerebroventricular (ICV) treatment (vehicle and leptin). Surprisingly, we observed negligible weight loss (ranging from  $-5.42\%$  to  $1.49\%$ ) in four animals of leptin-ICV treatment group, in which the cannula may not have been in place or treatment did not work. Therefore, these animals were removed from the analyses while evaluating effects of leptin administration on body weight, food intake and insulin levels. However, we thought that it would be interesting to determine if the gene expression profile of these animals were different from the animals showing weight loss. Therefore, for microarray analyses, we sub divided the LEP-ICV group into two groups: (a) LEP\_ICV group: treatment worked (weight loss range:  $25\%$ – $38\%$ ) and (b) LEP\_ICV\*: treatment did not work (weight loss  $-5.42\%$  to  $1.49\%$ ). This resulted in total five groups: VEH-SQ, LEP-SQ, VEH-ICV, LEP-ICV, and LEP-ICV\*. To minimize the cost of the experiment, we randomly selected mice ( $n = 4$ ) from these five groups for microarray profiling.

### Leptin Administration

Mice assigned to ICV treatments were surgically prepared with unilateral cannulas directed towards the right lateral cerebral ventricle as previously described [11]. Osmotic mini-pumps were surgically placed SQ to provide continuous infusion of control and test solutions for 12 days. For ICV treatments, polyethylene tubing filled with 6 $\mu$ l artificial cerebrospinal fluid (aCSF) was

connected from the mini-pump to the ICV cannula. All mice were allowed to recover for 2 days after surgery; during this time 6 $\mu$ l of saline or 6 $\mu$ l of aCSF were infused prior to the treatment infusion. Leptin was continuously delivered subcutaneously (SQ; Control: 6  $\mu$ l/d saline; Leptin group: 10.0  $\mu$ g/d leptin) or into the lateral cerebral ventricle (ICV) (Control: 6  $\mu$ l/d aCSF; Leptin group: 1.5  $\mu$ g/d leptin) via osmotic pumps for 12 days. Body weight and food intakes were measured daily. Water was available *ad libitum*. The mice were sedated with CO<sub>2</sub>, sacrificed by guillotine prior to the collection of blood and tissues. Serum samples were stored at  $-80^{\circ}\text{C}$  until assayed. Insulin, was determined using the Lumine $\times 100^{\text{TM}}$  instrumentation and a multiplex assay kit (Mouse Endocrine Immunoassay Panel catalog # MENDO-75K, protocol - <http://www.lincoresearch.com/protocols/mendo-75k.html>) manufactured by LINCO Research, Inc (St. Charles, MO). Brains of mice assigned to ICV treatments were sectioned to confirm proper cannula placement. All surgical and experimental procedures in this study were conducted in accordance with the NIH Guidelines and were approved by the Animal Care and Use Committee for The University of Georgia prior to initiating the studies under the Animal Use Proposal # A2007-10224-0.

### Microarray hybridization

Total RNA was isolated using TRI REAGENT (Sigma), according to the manufacturer's protocol. Purified RNA (200 ng) was further used for cRNA amplification and labeling with biotin using Target Amp cDNA synthesis kit (Epicenter catalog no. TAB1R6924). Approximately 750ng of labeled cRNA was hybridized to the MouseRef-8 v2.0 Expression BeadChips as per manufacturer's instructions. MouseRef-8 BeadChip targets 25,600 RefSeq transcripts and enables the interrogation of eight samples in parallel. After hybridization, arrays were washed, stained with Cy3-conjugated streptavidin, and scanned. Image data were analyzed with BeadStudio V2.0. Raw intensity data from BeadStudio were exported for further statistical analyses. The microarray data are MIAME compliant and have been deposited in NCBI Gene Expression Omnibus and are accessible through GEO Series accession number GSE20878.

### Differential gene expression analysis

Microarray data were normalized using the *lumi* package in R, using the variance stabilizing transformation (VST) of the package and robust spline normalization (RSN). Differential expression analyses were conducted using the LIMMA (Linear Models for Microarray Analysis) package from the Bioconductor project [12]. LIMMA uses an empirical Bayes approach that uses the variability in all genes for testing for significant differences, with this approach resulting in more stable inferences for a relatively small number of arrays [12,13]. We used LIMMA to test for a linear association between gene expression levels and amount of weight loss (grams), using the amount of weight loss in a linear model and testing for the significance of the regression coefficient for weight loss. We used the false discovery rate (FDR) adjust for multiple testing [14]. B-statistics (the log of the odds of a gene showing either any association with weight loss) were calculated for each gene. Duplicate genes, when present, were removed and their expression levels averaged across the duplicates. We used a combination of "B statistic" and absolute value of slope (logFC) for selecting the differentially expressed genes. B statistic is the log odds of a gene showing either positive or negative correlation with weight loss (also known as a lod score) and logFC determines the magnitude of change in expression with weight loss. We used a cut-off of  $B > 0$  and  $\log\text{FC} > 0.02$  (which corresponds to  $\sim 2$ -fold or

greater change in expression from lowest weight loss to highest weight loss point in graph). A total of 221 probes representing 214 unique genes were found significantly correlated with weight loss.

### Cluster analysis

Cluster analysis was performed for grouping differentially expressed genes exhibiting similar expression patterns using the HPCluster program [15]. HPCluster is a two-stage algorithm: the first stage is based on BIRCH (Balanced Iterative Reducing and Clustering using Hierarchies), while the second stage is a conventional k-Means. With BIRCH, a tree of cluster features defining the partitioning of high dimensional space is generated, followed by a conventional k-Means clustering of each cluster feature obtained with BIRCH. Two hundred and fourteen genes could be grouped into four clusters based on the expression data.

### Gene ontology analysis

Associations of the 214 differentially expressed genes with biological processes, molecular functions and cellular compartments were annotated using the GOTree Machine [16]. The GOTree Machine uses the hypergeometric test to evaluate the significance of enrichment for each category by determining if the observed number of gene counts exceeded the expected counts. The “FDR” method was used for adjusting the p-values for multiple testing. The results were visualized as a directed acyclic graph (tree) in order to show the relationship among the enriched GO categories.

## Results

The present study was designed to identify hepatic genes and pathways correlated with leptin mediated weight loss. Leptin deficient *ob/ob* mice were continuously administered with leptin via ICV (1.5 µg/d) or SQ (10 µg/d) over the 12-day treatment period. Liver RNA was extracted and cDNA microarray technology was used to explore the change in global gene expression profiles after two types of leptin administration. The four animals with negligible weight loss (ranging from -5.42% to 1.49%) after leptin-ICV treatment animals were removed from the analyses while evaluating effects of leptin administration on body

weight, food intake and insulin levels. However we profiled these animals for gene expression, and the data were included for Identification of genes correlated with weight loss.

### Effects of central and peripheral leptin administration on body weight and food intake

Both central and peripheral leptin administrations caused a significant reduction in food intake (FI) in leptin treated *ob/ob* mice as compared to vehicle treated *ob/ob* mice (SQ:  $3.66 \pm 0.49$  g (leptin) vs  $5.80 \pm 0.79$  g (vehicle); ICV:  $2.45 \pm 0.65$  g (leptin) vs  $5.57 \pm 0.65$  g (vehicle); Figure 1A). Similarly, there was a significant reduction in body weight (BW) in both ICV & SQ leptin groups as compared to their respective controls. Interestingly, percent weight loss in the ICV leptin-treated group was significantly greater than the weight loss in SQ leptin-treated group (SQ:  $14.89 \pm 1.15$  g (leptin) vs  $-4.50 \pm 0.76$  g (vehicle); ICV:  $30.51 \pm 2.87$  g (leptin) vs  $-4.23 \pm 0.78$  g (vehicle); Figure 1B). Values are mean  $\pm$  SEM.

### Leptin administration decreases serum insulin levels

The 12 days of leptin infusion in *ob/ob* mice, resulted in a significant decrease in serum insulin levels in both central and peripheral leptin treatment groups, as compared to their respective controls (SQ:  $91.79 \pm 8.91$  (leptin) vs  $787.7 \pm 70.74$  pM (vehicle); ICV:  $29.25 \pm 6.44$  (leptin) vs  $815.2 \pm 98.15$  pM (vehicle), Figure 1C). There was also a significant difference between the leptin-treated groups; the decrease in the insulin levels being greater in the ICV group as compared to the SQ group (Figure 1C). Values are mean  $\pm$  SEM.

### Identification of genes correlated with leptin-mediated weight loss

We adopted microarray technology to compare the global gene expression profiles after the central (ICV) and peripheral (SQ) leptin treatments in *ob/ob* mice. C57BL6 mice were used for the baseline gene expression. Two hundred and twenty-one probes representing 214 unique genes were found to be significantly correlated with leptin mediated weight loss. We have listed the top 15 upregulated genes (with a two-fold or greater change in expression for each treatment) in Table 1 and 37 downregulated

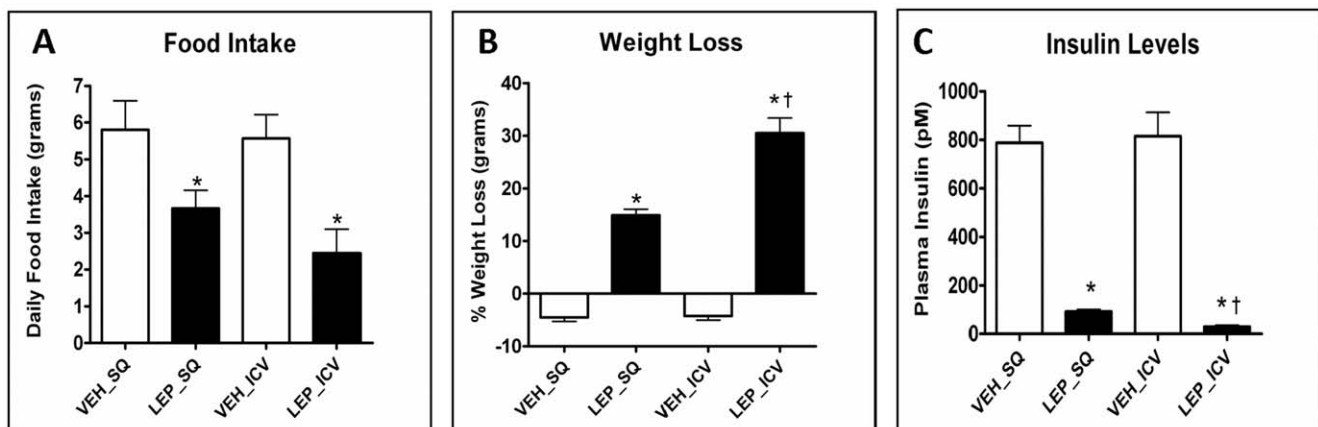

**Figure 1. Effect of central (intracerebroventricular:ICV) or peripheral (subcutaneous:SQ) leptin treatment on food intake, weight loss, and serum insulin levels in *ob/ob* mice.** Leptin deficient, *ob/ob* mice were continuously administered with leptin over 12-days using central or peripheral route of administration. Both types of leptin infusion significantly decrease food intake, weight, and serum insulin levels, as compared to their respective controls. The weight loss caused by central treatment is significantly greater than the peripheral treatment. Also, the decrease in the insulin level was more in the central group as compared to the peripheral group. VEH\_SQ: vehicle subcutaneous treatment, LEP\_SQ: leptin subcutaneous treatment, VEH\_ICV: vehicle intracerebroventricular treatment, LEP\_ICV: leptin intracerebroventricular treatment. Values are mean  $\pm$  SEM; n=9 Veh\_SQ, n=10 Lep\_SQ, n=9 Veh\_ICV and n=4 Lep\_ICV; \*P<0.05 leptin vs respective vehicle, † p<0.05 Lep\_ICV vs Lep\_SQ. doi:10.1371/journal.pone.0012147.g001

genes in Table 2. The plots of the regression analyses (expression vs weight loss graphs) of the top six upregulated and top six downregulated genes mentioned above are shown in Figure 2. The phenotype data and weight loss of four ICV leptin treated animals (represented by red crossed circle) were very similar to the vehicle treated animals. Sectioning of the brain could not confirm placement of the cannula in two of these animals. As seen in the heatmap and correlation plots, the expression of these animals is very similar to the vehicle treated animals. Correlation plots of all 214 differentially expressed genes are available in supplementary material (File S1: Top-214 Correlation plots.pdf).

### Cluster analysis of correlated genes

Next, we performed cluster analyses on the 214 genes significantly correlated with leptin mediated weight loss and found 4 clusters, each of which defined a unique pattern of expression (Figure 3). The four animals in which the cannula may not have been in place or treatment did not work are represented on the heatmap as LEP-ICV\*. The expression pattern of these animals is similar to the vehicle groups. Seventy genes represented by cluster-1 are overexpressed in *ob/ob* mice as compared to B6 mice. After leptin replacement, the expression of these genes is normalized towards B6 mice. Similarly, 46 genes in cluster-2 are under-expressed in *ob/ob* as compared to B6 and leptin treatment could correct the expression back to normal. 56 genes of cluster-3 and 42 genes of cluster-4 have similar expression in B6 and *ob/ob* but these genes are downregulated (Cluster-3) or upregulated (Cluster-4) after leptin treatment. The complete spreadsheet with gene symbols and cluster assignment is available as supplementary material (File S2: 214\_Gene\_matrix.xls).

### Biological processes of genes regulated by leptin treatment

Using the GOTree Machine web application [16], the 214 differentially expressed genes were categorized as being associated

with specific biological processes, molecular functions and cellular compartments. Statistically significant over represented biological processes were determined using the hypergeometric test. Among the cellular compartments, mitochondrion (32 genes), endoplasmic reticulum (22 genes) and vacuole (8 genes) were significantly over represented. To determine if there was a difference in enrichment of upregulated versus downregulated genes, the two groups (126 downregulated and 88 upregulated genes) were also mapped separately to GO categories. The results were visualized as a gene ontology tree in order to show the relationship among the enriched GO categories (Figure 4). Several biological processes such as cellular metabolic processes (101 genes), catabolic processes (36 genes), biosynthetic processes (28 genes), oxidation reduction (27 genes), response to chemical stimulus (35 genes), and inflammatory response (10 genes) were found to be significantly over represented. Among the molecular functions, oxidoreductase activity (26 genes), cofactor binding (14 genes), catalytic activity (89 genes), electron carrier activity (10 genes) and iron ion binding (12 genes) were significantly over represented. The complete gene ontology analyses results are available as supplementary material (File S3: Gene Ontology.pdf).

### Downregulated biological pathways after leptin administration in *ob/ob* mice

**Mitochondrial metabolic pathways.** The gene ontology analyses revealed that most significantly enriched cellular compartments among downregulated genes are mitochondrion and endoplasmic reticulum. Thirty-two genes could be mapped to mitochondrion, 26 genes were downregulated and 6 genes were upregulated after leptin treatment (Table 3). The most affected mitochondrial pathways are, ketone metabolic process, organic acid metabolic process, oxidation reduction, amino acid metabolic process, and nitrogen compound metabolic process. Among the molecular functions, electron carrier activity, catalytic activity, and coenzyme binding were most affected

**Table 1.** Top 15 upregulated genes involved in leptin mediated weight loss.

| Symbol       | FC_SQ <sup>a</sup> | FC_ICV <sup>b</sup> | FC_ob/B6 <sup>c</sup> | adj.P.Val <sup>d</sup> | Definition                                                      |
|--------------|--------------------|---------------------|-----------------------|------------------------|-----------------------------------------------------------------|
| Igfbp2       | 6.54               | 16.10               | 0.06                  | 2.10E-08               | insulin-like growth factor binding protein 2                    |
| Acot1        | 3.12               | 5.60                | 0.65                  | 0.000739               | acyl-CoA thioesterase 1                                         |
| Lyz          | 2.33               | 4.93                | 0.41                  | 0.000107               | Lysozyme                                                        |
| Mat2a        | 2.55               | 4.10                | 0.37                  | 0.000703               | methionine adenosyltransferase II, alpha                        |
| Lpl          | 2.32               | 4.03                | 0.86                  | 0.000211               | lipoprotein lipase (Lpl)                                        |
| Pla2g12a     | 2.04               | 4.57                | 0.66                  | 0.000125               | phospholipase A2, group XIA                                     |
| Wbp5         | 3.01               | 3.44                | 0.35                  | 0.000535               | WW domain binding protein 5                                     |
| C1qb         | 2.32               | 3.22                | 0.28                  | 0.000584               | complement component 1, q subcomponent, beta polypeptide        |
| H2-Ab1       | 2.52               | 2.88                | 0.50                  | 0.001534               | histocompatibility 2, class II antigen A, beta 1                |
| Hadhb        | 2.04               | 3.17                | 0.99                  | 0.000344               | hydroxyacyl-Coenzyme A dehydrogenase                            |
| Egfr         | 2.58               | 2.48                | 0.16                  | 0.001144               | epidermal growth factor receptor                                |
| Slc25a33     | 2.60               | 2.43                | 0.38                  | 0.000271               | solute carrier family 25, member 33                             |
| Slc40a1      | 2.24               | 2.77                | 0.68                  | 0.001166               | solute carrier family 40 (iron-regulated transporter), member 1 |
| LOC100046120 | 2.30               | 2.65                | 0.33                  | 0.001791               | <i>s musculus</i> similar to clusterin                          |
| Rps11        | 2.12               | 2.52                | 0.38                  | 0.001243               | ribosomal protein S11                                           |

<sup>a</sup>FC\_SQ: fold change in gene expression after peripheral (subcutaneous) leptin administration as compared to vehicle subcutaneous treatment.

<sup>b</sup>FC\_ICV: fold change in gene expression after central (intracerebroventricular) leptin administration as compared to vehicle intracerebroventricular treatment.

<sup>c</sup>FC\_ob/B6: fold change in gene expression in vehicle treated *ob/ob* mice as compared to the expression in B6 mice.

<sup>d</sup>adj.P.Val: adj. p-value of regression analysis performed to test for a linear association between gene expression levels and amount of weight loss.

doi:10.1371/journal.pone.0012147.t001

**Table 2.** Top 37 downregulated genes involved in leptin mediated weight loss.

| Symbol               | FC_SQ <sup>a</sup> | FC_ICV <sup>b</sup> | FC_ob/B6 <sup>c</sup> | adj.P.Val <sup>d</sup> | Definition                                                                      |
|----------------------|--------------------|---------------------|-----------------------|------------------------|---------------------------------------------------------------------------------|
| <b>Scd1</b>          | 0.05               | 0.01                | 4.60                  | 3.33E-07               | stearoyl-Coenzyme A desaturase 1                                                |
| <b>Gsta1</b>         | 0.09               | 0.11                | 41.28                 | 0.000125               | glutathione S-transferase, alpha 1                                              |
| <b>Hamp2</b>         | 0.32               | 0.03                | 2.16                  | 8.76E-07               | hepcidin antimicrobial peptide 2                                                |
| <b>Cyp17a1</b>       | 0.24               | 0.17                | 2.59                  | 6.85E-06               | cytochrome P450, family 17, subfamily a, polypeptide 1                          |
| <b>Ahcy</b>          | 0.25               | 0.18                | 4.50                  | 7.94E-05               | S-adenosylhomocysteine hydrolase                                                |
| <b>Raet1b</b>        | 0.41               | 0.12                | 7.26                  | 8.76E-07               | retinoic acid early transcript beta                                             |
| <b>Sardh</b>         | 0.27               | 0.17                | 3.86                  | 0.001766               | sarcosine dehydrogenase                                                         |
| <b>Gsta2</b>         | 0.23               | 0.22                | 8.24                  | 0.000131               | glutathione S-transferase, alpha 2                                              |
| <b>Rdh16</b>         | 0.29               | 0.20                | 5.93                  | 5.65E-06               | retinol dehydrogenase 16                                                        |
| <b>Aass</b>          | 0.29               | 0.22                | 4.63                  | 0.000942               | aminoadipate-semialdehyde synthase                                              |
| <b>Pla2g4f</b>       | 0.23               | 0.28                | 4.14                  | 0.000178               | phospholipase A2, group IVF                                                     |
| <b>Lrtm1</b>         | 0.32               | 0.20                | 2.05                  | 6.44E-05               | leucine-rich repeats and transmembrane domains 1                                |
| <b>Gstt3</b>         | 0.41               | 0.12                | 2.67                  | 2.13E-07               | glutathione S-transferase, theta 3                                              |
| <b>Thrsp</b>         | 0.35               | 0.21                | 0.90                  | 0.000931               | thyroid hormone responsive SPOT14 homolog                                       |
| <b>Bhmt</b>          | 0.35               | 0.23                | 5.59                  | 0.000696               | betaine-homocysteine methyltransferase                                          |
| <b>Selenbp2</b>      | 0.32               | 0.30                | 1.76                  | 0.000285               | selenium binding protein 2                                                      |
| <b>Rcan2</b>         | 0.30               | 0.33                | 3.01                  | 8.09E-05               | regulator of calcineurin 2                                                      |
| <b>Mmd2</b>          | 0.29               | 0.34                | 2.79                  | 0.000309               | monocyte to macrophage differentiation-associated 2                             |
| <b>Gamt</b>          | 0.36               | 0.29                | 1.85                  | 0.000344               | guanidinoacetate methyltransferase                                              |
| <b>Dmgdh</b>         | 0.31               | 0.34                | 3.82                  | 0.000703               | dimethylglycine dehydrogenase precursor                                         |
| <b>Olig1</b>         | 0.41               | 0.25                | 6.69                  | 2.86E-06               | oligodendrocyte transcription factor 1                                          |
| <b>Tmie</b>          | 0.48               | 0.18                | 4.48                  | 0.000109               | transmembrane inner ear                                                         |
| <b>Snhg11</b>        | 0.35               | 0.31                | 3.98                  | 0.000314               | small nucleolar RNA host gene 11                                                |
| <b>Kcnk5</b>         | 0.45               | 0.22                | 1.99                  | 0.000682               | potassium channel, subfamily K, member 5                                        |
| <b>Aes</b>           | 0.36               | 0.31                | 2.66                  | 0.000315               | amino-terminal enhancer of split                                                |
| <b>Nnmt</b>          | 0.48               | 0.21                | 1.29                  | 0.002523               | nicotinamide N-methyltransferase                                                |
| <b>9130409I23Rik</b> | 0.35               | 0.35                | 3.35                  | 0.001156               | RIKEN cDNA 9130409I23 gene                                                      |
| <b>Slc38a4</b>       | 0.40               | 0.32                | 5.60                  | 0.002091               | solute carrier family 38, member 4                                              |
| <b>Slc25a1</b>       | 0.44               | 0.30                | 1.81                  | 2.96E-05               | solute carrier family 25 (mitochondrial carrier, citrate transporter), member 1 |
| <b>Uroc1</b>         | 0.48               | 0.28                | 2.84                  | 6.63E-05               | urocanase domain containing 1                                                   |
| <b>Hsd17b10</b>      | 0.42               | 0.36                | 3.47                  | 0.000125               | hydroxysteroid (17-beta) dehydrogenase 10                                       |
| <b>Pls3</b>          | 0.46               | 0.33                | 4.45                  | 0.002206               | plastin 3                                                                       |
| <b>Fam158a</b>       | 0.44               | 0.39                | 2.84                  | 0.00198                | family with sequence similarity 158, member A                                   |
| <b>C530044N13Rik</b> | 0.47               | 0.39                | 3.14                  | 0.002232               | RIKEN cDNA C530044N13 gene                                                      |
| <b>Slc44a1</b>       | 0.48               | 0.40                | 2.09                  | 5.28E-05               | solute carrier family 44, member 1                                              |
| <b>Oprs1</b>         | 0.47               | 0.43                | 2.03                  | 0.001192               | opioid receptor, sigma 1                                                        |
| <b>Mfsd2</b>         | 0.45               | 0.48                | 2.59                  | 0.001226               | major facilitator superfamily domain containing 2                               |

<sup>a</sup>FC\_SQ: fold change in gene expression after peripheral (subcutaneous) leptin administration as compared to vehicle subcutaneous treatment.

<sup>b</sup>FC\_ICV: fold change in gene expression after central (intracerebroventricular) leptin administration as compared to vehicle intracerebroventricular treatment.

<sup>c</sup>FC\_ob/B6: fold change in gene expression in vehicle treated *ob/ob* mice as compared to the expression in B6 mice.

<sup>d</sup>adj.P.Val: adj. p-value of regression analysis performed to test for a linear association between gene expression levels and amount of weight loss.

doi:10.1371/journal.pone.0012147.t002

after leptin treatment. We found that overexpression of genes related to cellular metabolism is a characteristic of *ob/ob* mice, while leptin replacement normalizes this expression back towards B6. The livers of *ob/ob* mice are overloaded with large amounts of free fatty acids either through increased fatty acid biosynthesis or through decreased fatty acid oxidation. Leptin administration promotes a hypometabolic state and downregulates cellular metabolic activity. Surprisingly, this condition is very similar to hibernation [17]. The key to the

survival under hibernation lays in an inherent ability to downregulate cellular metabolic rate to new hypometabolic steady states. There was a downregulation of most genes involved in amino acid metabolism, lipid, fatty acid and steroid metabolism and oxidation/reduction after leptin treatment in *ob/ob* mice. Mitochondrial metabolic pathways are major regulators of leptin-mediated weight loss.

**Lipid metabolic process.** We found 26 genes differentially expressed under lipid metabolic processes, out of which 19 genes

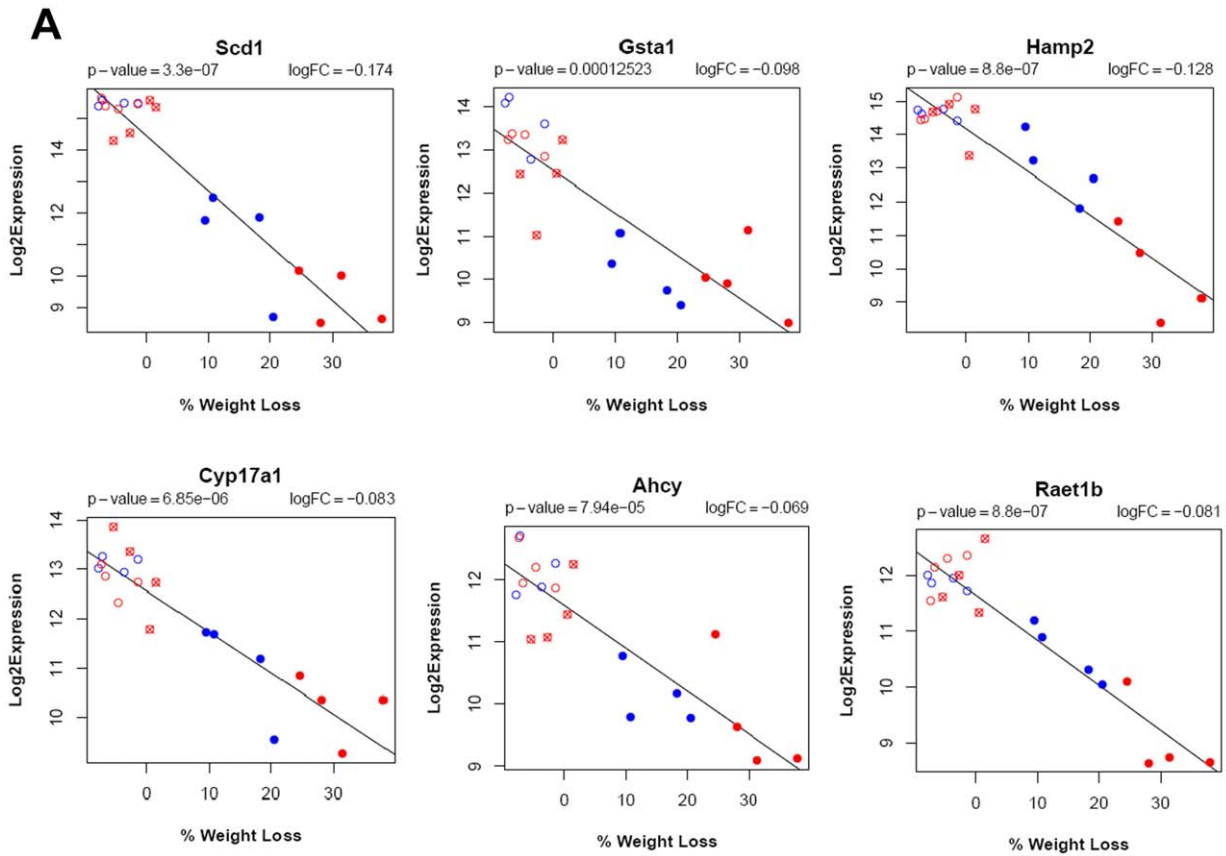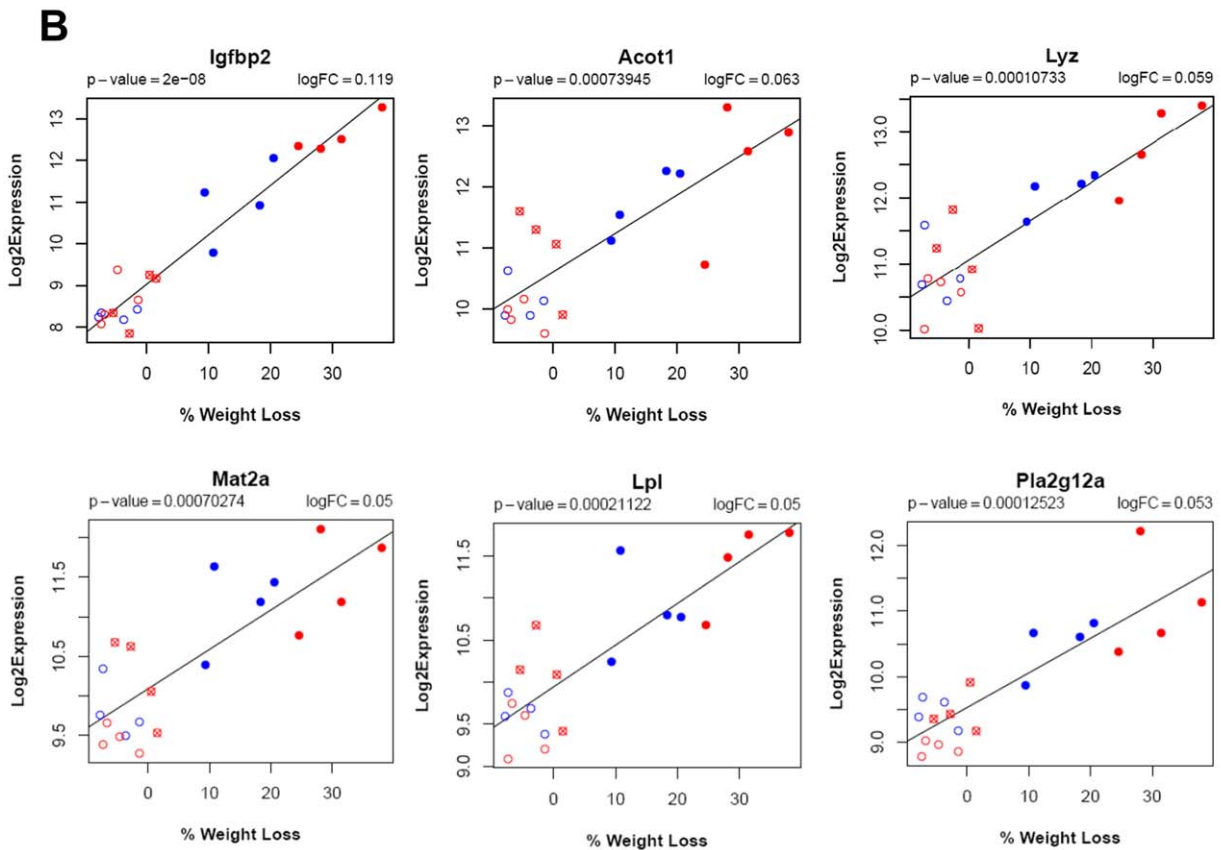

**Figure 2. Regression plots of top six downregulated and top six upregulated genes.** The regression analysis was performed using “LIMMA” to identify genes whose expression is significantly correlated with leptin mediated weight loss. Blue open circle is vehicle subcutaneous treatment; Blue filled circle is leptin subcutaneous treatment; Red open circle is vehicle intracerebroventricular treatment; Red filled circle is leptin intracerebroventricular treatment; Red crossed circle is leptin intracerebroventricular treatment but no weight loss.  
doi:10.1371/journal.pone.0012147.g002

were downregulated. Also, 12 of these genes could be mapped to lipid biosynthetic process, out of which 10 genes were downregulated. Leptin influences the rates of synthesis and degradation of lipids through its autocrine and paracrine actions. The molecular mechanism of leptin action in fatty acid metabolism and lipid biosynthesis has not yet been fully elucidated. We found that *Scd1*, *Faah*, *Acot1*, *Rdh16* and *Lss* are downregulated by leptin treatment. The microsomal enzyme, stearoyl-CoA desaturase-1 (*Scd1*) catalyzes the biosynthesis of monounsaturated fatty acids from saturated fatty acids. In our study we found that leptin-deficient *ob/ob* mice have very high levels (~5-fold) of *Scd1* gene expression as compared to B6 control mice and after leptin replacement in *ob/ob* mice, the *Scd1* gene expression is extremely downregulated (~20-fold in SQ and ~100-fold in ICV) as compared to their respective controls. Therefore, *Scd1* appears to be a major player in the leptin mediated lipid biosynthesis and fatty acid metabolism. This finding is consistent with other studies which have shown that *ob/ob* mice with mutations in *Scd1* gene are significantly less obese than *ob/ob* controls and have markedly increased energy expenditure. A significant proportion of metabolic effects of leptin are the result of inhibition of this enzyme [18]. On the other hand the *Scd1*<sup>-/-</sup> mice in SV129 background are lean, resistant to diet-induced obesity, have increased insulin sensitivity, and increased metabolic rate [19].

**Carboxylic acid metabolic process.** Twenty-four down-regulated genes including *Gck*, *Faah*, *Otc*, *Arg1*, *Gls2*, *Ass1*, *Prodh* and *Aass*, could be mapped to carboxylic acid metabolic pathways. Glucokinase (*GcK*) regulates rate-limiting reactions in glycolysis. Expression of *GcK* is regulated in the liver in response to fasting and feeding. We found that *GcK* is 2-fold and 5-fold downregulated after leptin administration. Hepatocyte nuclear factor 4 alpha (*HNF4alpha*) plays an important role in transcriptional regulation of *GcK* gene [20] and many genes expressed in the liver. We found that *HNF-4* has a downward trend after leptin administration, but could not reach to statistical significance. *HNF4alpha* is also critical for urea homeostasis by direct regulation of the *Otc* gene [21]. *Otc* is a key enzyme in the urea cycle to detoxify ammonium produced from amino acid catabolism. Here, we found that *Otc* was also significantly downregulated after leptin replacement.

**Iron ion binding.** In this study, we found that 12 genes could be annotated to the iron ion binding group. The 9 downregulated genes were *Cisd1*, *Hao*, *Cyp17a1*, *Dpyd*, *Hpd*, *Scd1*, *Cyp2c29*, *Ndufs8*, and *Sfxn1* and 3 upregulated genes of this group were *Cyba*, *Hpx* and *Slc40a1*. There is a well established link between obesity and iron metabolism. *Ob/ob* mice have higher iron absorption as compared to lean mice [22]. There is evidence in the literature that insulin resistance is associated with hepatic iron overload. A recent study found a role of Hepacidin expression in

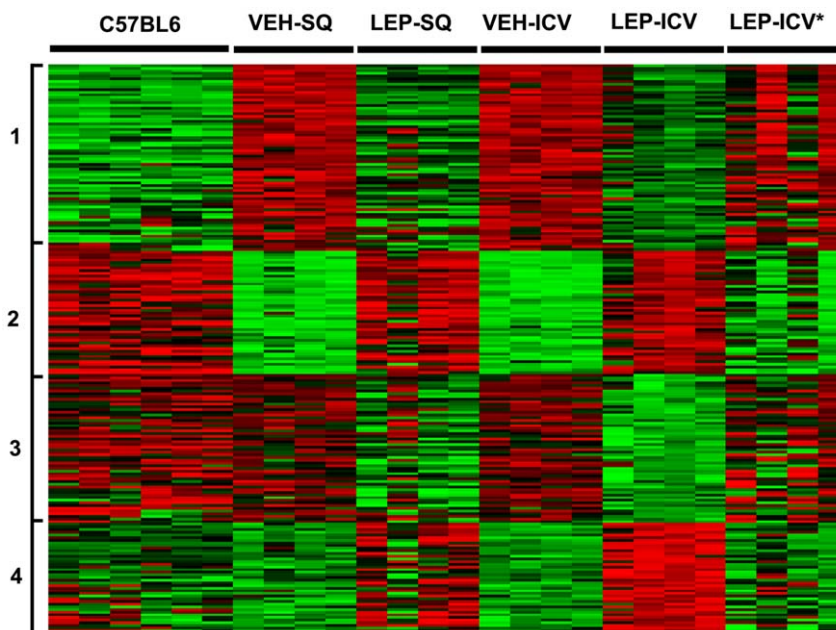

**Figure 3. Heatmap of 214 differentially expressed genes showing gene expression levels across different samples.** Each row represents one gene and each column represents one sample. Red indicates higher expression and green indicates lower expression. The global gene expression profiles were compared after the central and peripheral leptin treatments in *ob/ob* mice, while C57BL6 mice were used for the baseline gene expression. Cluster analysis on the gene expression data was performed to group the genes with similar expression patterns across experimental conditions. VEH-SQ: vehicle subcutaneous treatment, LEP-SQ: leptin subcutaneous treatment, VEH-ICV: vehicle intracerebroventricular treatment, LEP-ICV: leptin intracerebroventricular treatment, LEP-ICV\*: represents four animals in which the cannula may not have been in place or treatment failed. While analyzing the phenotype data, we found that there was no weight loss in these four animals. Sectioning of the brain could not confirm placement of the cannula in these animals. The expression of these animals is very similar to the vehicle treated animals.  
doi:10.1371/journal.pone.0012147.g003

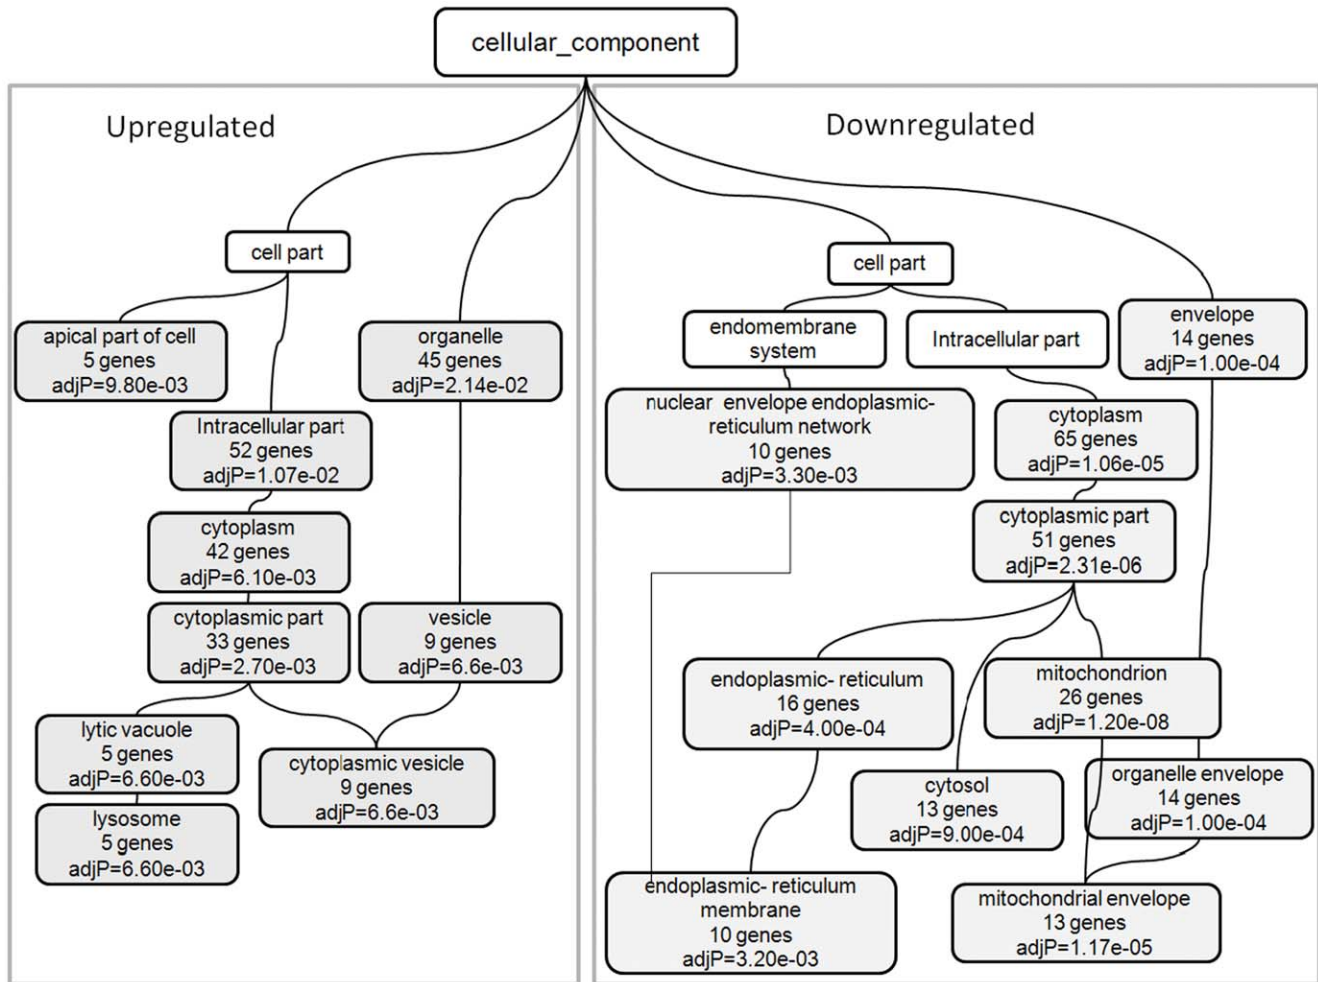

**Figure 4. Gene Ontology tree representing the cellular compartments enriched by upregulated and downregulated set of genes.** Gene ontology analysis was performed using the *GOTree Machine* software which performs the hypergeometric test to evaluate the significance of enrichment for each category by determining if the observed number of gene counts exceeded the expected counts. Among the cellular compartments mitochondrion and endoplasmic reticulum are enriched by downregulated genes and vacuole, vesicle, lysosome are significantly enriched by upregulated genes.  
doi:10.1371/journal.pone.0012147.g004

metabolic syndrome and hepatic iron overload associated with insulin resistance [23]. Interestingly, in our study, we also found that expression of hepcidin antimicrobial peptide 2 (*Hamp2*) was 3-fold and 28-fold downregulated after leptin treatment.

**Glutathione S Transferases.** Glutathione is a major endogenous anti-oxidant for the cell. We found that three of the glutathione S-transferases were significantly overexpressed in *ob/ob* mice as compared to B6 (*Gsta1*: 41-fold, *Gsta2*: 8-fold, *Gstt3*: 3-fold). Also, leptin replacement caused the downregulation of *Gsta1*, *Gsta2*, *Gsta3*, *Gstt1* and *Gstt3* in *ob/ob* mice. Reactive oxygen species (ROS) production by mitochondria plays a critical role in many physiological processes and therefore over quenching of ROS in *ob/ob* mice may result in pathological conditions. A recent study has shown that mice lacking one of the key enzymes involved in the elimination of physiological ROS, glutathione peroxidase 1 (*Gpx1*), were protected from high-fat-diet-induced insulin resistance [24].

**Genes involved in adipocyte proliferation and differentiation.** It is well known that adipocyte proliferation and differentiation plays a critical role in obesity. Leptin causes alterations in the expression of many genes which inhibit adipocyte

differentiation. The expression of *Igfbp2* gene, which negatively regulates the biological activity of IGF1, was  $6\times$  (SQ) and  $16\times$  (ICV) upregulated after leptin replacement. *Igfbp2* is almost  $17\times$  downregulated in *ob/ob* mice as compared to B6. Another mitochondrial gene, *Cisd1* was  $2.4\times$  upregulated in *ob/ob* mice as compared to B6 and corrected back to normal by leptin. This protein encodes for MitoNEET protein which exists in low levels in preadipocytes, and its expression increases exponentially in differentiated adipocytes. Leptin has a mitogenic potential in liver cancer cells, which is mediated through the induction of *Mat2a* and *Mat2b* genes [25]. In this study, we found that expression of *Mat2a* was induced after both types of leptin treatment.

#### Upregulated biological processes after leptin administration in *ob/ob* Mice

**Lysosomal activity.** We found that the cellular compartments enriched by upregulated genes were lysosome (5 genes), vacuole (6 genes), and vesicle (9 genes). Lysosomes contain enzymes which destroy organelles that have been damaged. Also, when adequate amount of food is not available for the cell, the organelle degradation and lysosomal activity is increased. A



**Table 3.** 32 mitochondrial genes involved in leptin signaling.

| Symbol          | FC_SQ <sup>a</sup> | FC_ICV <sup>b</sup> | FC_ob/B6 <sup>c</sup> | adj.P.Val <sup>d</sup> | Definition                                                                                                                           |
|-----------------|--------------------|---------------------|-----------------------|------------------------|--------------------------------------------------------------------------------------------------------------------------------------|
| <b>Sardh</b>    | 0.27               | 0.17                | 3.86                  | 0.001766               | sarcosine dehydrogenase                                                                                                              |
| <b>Aass</b>     | 0.29               | 0.22                | 4.63                  | 0.000942               | aminoadipate-semialdehyde synthase                                                                                                   |
| <b>Gck</b>      | 0.58               | 0.21                | 2.96                  | 0.000114               | Glucokinase                                                                                                                          |
| <b>Abat</b>     | 0.53               | 0.25                | 2.30                  | 7.01E-05               | 4-aminobutyrate aminotransferase                                                                                                     |
| <b>Dmgdh</b>    | 0.31               | 0.34                | 3.82                  | 0.000703               | dimethylglycine dehydrogenase precursor                                                                                              |
| <b>Slc25a1</b>  | 0.44               | 0.30                | 1.81                  | 2.96E-05               | solute carrier family 25 (mitochondrial carrier, citrate transporter), member 1                                                      |
| <b>Hsd17b10</b> | 0.42               | 0.36                | 3.47                  | 0.000125               | hydroxysteroid (17-beta) dehydrogenase 10                                                                                            |
| <b>Otc</b>      | 0.82               | 0.32                | 1.71                  | 0.002029               | ornithine transcarbamylase                                                                                                           |
| <b>Cisd1</b>    | 0.53               | 0.38                | 2.35                  | 0.001166               | CDGSH iron sulfur domain 1                                                                                                           |
| <b>Kynu</b>     | 0.62               | 0.46                | 1.98                  | 3.95E-05               | kynureninase (L-kynurenine hydrolase)                                                                                                |
| <b>Gcdh</b>     | 0.57               | 0.52                | 1.67                  | 0.000211               | glutaryl-Coenzyme A dehydrogenase                                                                                                    |
| <b>Nipsnap1</b> | 0.69               | 0.48                | 1.61                  | 1.01E-06               | 4-nitrophenylphosphatase domain and non-neuronal SNAP25-like protein homolog 1 (C. elegans)                                          |
| <b>Ndufs8</b>   | 0.62               | 0.51                | 1.47                  | 0.001217               | NADH dehydrogenase (ubiquinone) Fe-S protein 8                                                                                       |
| <b>Sfxn1</b>    | 0.76               | 0.55                | 1.77                  | 1.61E-05               | sideroflexin 1                                                                                                                       |
| <b>Dbi</b>      | 0.60               | 0.61                | 2.05                  | 0.000292               | diazepam binding inhibitor                                                                                                           |
| <b>Cyp17a1</b>  | 0.24               | 0.17                | 2.59                  | 6.85E-06               | cytochrome P450, family 17, subfamily a, polypeptide 1                                                                               |
| <b>Hao</b>      | 0.57               | 0.20                | 1.26                  | 0.000502               | 3-hydroxyanthranilate 3,4-dioxygenase                                                                                                |
| <b>Prodh</b>    | 0.61               | 0.21                | 1.35                  | 2.57E-05               | proline dehydrogenase                                                                                                                |
| <b>Gls2</b>     | 0.73               | 0.25                | 0.84                  | 1.45E-03               | glutaminase 2 (liver, mitochondrial)                                                                                                 |
| <b>Ass1</b>     | 0.80               | 0.34                | 0.94                  | 0.001664               | argininosuccinate synthetase 1                                                                                                       |
| <b>Mmab</b>     | 0.75               | 0.47                | 0.95                  | 2.96E-05               | methylmalonic aciduria (cobalamin deficiency) type B homolog (human)                                                                 |
| <b>MacroD1</b>  | 0.95               | 0.50                | 0.64                  | 0.001609               | MACRO domain containing 1                                                                                                            |
| <b>Cyb5r3</b>   | 0.60               | 0.56                | 1.04                  | 0.000137               | cytochrome b5 reductase 3                                                                                                            |
| <b>Hsd3b2</b>   | 0.83               | 0.49                | 1.13                  | 0.000502               | hydroxy-delta-5-steroid dehydrogenase, 3 beta- and steroid delta-isomerase 2                                                         |
| <b>Ndufa3</b>   | 0.74               | 0.60                | 1.08                  | 0.000687               | NADH dehydrogenase (ubiquinone) 1 alpha subcomplex, 3                                                                                |
| <b>Uqcrc1</b>   | 0.58               | 0.64                | 1.24                  | 0.000902               | ubiquinol-cytochrome c reductase core protein 1                                                                                      |
| <b>Hadhb</b>    | 2.04               | 3.17                | 0.99                  | 0.000344               | hydroxyacyl-Coenzyme A dehydrogenase/3-ketoacyl-Coenzyme A thiolase/enoyl-Coenzyme A hydratase (trifunctional protein), beta subunit |
| <b>Ung</b>      | 1.27               | 2.95                | 0.76                  | 0.00021                | uracil DNA glycosylase                                                                                                               |
| <b>Mrps6</b>    | 1.20               | 1.91                | 0.92                  | 0.002234               | mitochondrial ribosomal protein S6                                                                                                   |
| <b>Slc25a33</b> | 2.60               | 2.43                | 0.38                  | 0.000271               | solute carrier family 25, member 33                                                                                                  |
| <b>Hsp90ab1</b> | 1.69               | 2.32                | 0.47                  | 0.001625               | heat shock protein 90kDa alpha (cytosolic), class B member 1                                                                         |
| <b>Cyba</b>     | 1.20               | 2.00                | 0.68                  | 7.33E-05               | cytochrome b-245, alpha polypeptide                                                                                                  |

<sup>a</sup>FC\_SQ: fold change in gene expression after peripheral (subcutaneous) leptin administration as compared to vehicle subcutaneous treatment.

<sup>b</sup>FC\_ICV: fold change in gene expression after central (intracerebroventricular) leptin administration as compared to vehicle intracerebroventricular treatment.

<sup>c</sup>FC\_ob/B6: fold change in gene expression in vehicle treated *ob/ob* mice as compared to the expression in B6 mice.

<sup>d</sup>adj.P.Val: adj. p-value of regression analysis performed to test for a linear association between gene expression levels and amount of weight loss.

doi:10.1371/journal.pone.0012147.t003

recent study has identified the previously unknown role of autophagy in regulating intracellular lipid stores [26]. Lysosomes continuously use portions of lipid droplets and process them for energy production during nutrient deprivation [26].

**Immune system and inflammatory response.** Leptin has structural similarities with the family of long-chain helical cytokines, including IL-6 and IL-12 and also has been found to play a critical regulatory role within the immune system that affects the course of inflammation [27]. Various studies have shown that immune cells respond to pharmacological doses of leptin. In this study we found that the immune system process and inflammatory response were enriched in the upregulated group of genes. The genes which were upregulated in this group are; C1qb, Cd44, Ccl4, Nupr1, Cyba, Fcer1g, Rmcs2, Fcer1g, Rps19, Plscr1,

Ednrb, Cd44, Ung, Ctnnb1, Lmo2, and Hpx. A recent study has shown the function of leptin within T-cell polarization [28]. Utilizing the model of oxazolone-induced colitis, authors found that *ob/ob* mice were protected, whereas wild-type and leptin-reconstituted *ob/ob* mice developed colitis. This protection of Th1- as well as in Th2-dependent inflammation was associated with decreased expression of T-bet and GATA-3, in naive *ob/ob* T cells [28]. In this study, we also found that epidermal growth factor receptor (EGFR) expression was upregulated almost 2.5 times after leptin replacement in *ob/ob* mice. It is known that EGFR mediates both chemotaxis and proliferation in monocytes and macrophages and treatment with EGFR inhibitor decreases the protein expression of TNF-alpha and IL-6, and reduces subclinical inflammation in HFD-fed mice [29].

**Comparison of two types of gene expression changes after leptin treatment in *ob/ob* mice**

Cluster analysis revealed that 214 differentially expressed genes could be sub-divided into two major groups: (A) 116 genes of Cluster-1 and Cluster-2, which have different expression in *ob/ob* when compared to B6, and leptin treatment normalizes the expression in *ob/ob* towards B6; (B) 98 genes of Cluster-3 and Cluster-4, which have similar expression in *ob/ob* and B6 but are downregulated or upregulated after leptin treatment. These two groups of genes were separately analyzed and were mapped to cellular compartments and biological functions (Table S1). The enriched cellular compartments in both groups were mitochondrion (group A: 19 genes; group B: 14 genes), cytosol (group A: 10 genes; group B: 10 genes) and endoplasmic reticulum (group A: 11 genes; group B: 11 genes). However, the plasma membrane (6 genes) and vacuole/lysosome (5 genes) were only enriched in group B. We have listed the comparison of enriched biological processes of each group in Table S1. Both groups are enriched in many metabolic processes whereas major catabolic processes are mainly enriched in group A. We also found that steroid metabolic process is only enriched in Group B and the genes involved in this process are *Gpsn2*, *Cyb5r3*, *Lss*, *Cyp17a1*, *Pcsk9*, *Mvd*, *Hsd3b2*.

**Network Analysis.** Differentially expressed genes were further analyzed using Ingenuity Pathway Analysis software

(IPA; Ingenuity Systems, Mountain View, CA; www.ingenuity.com) to construct and visualize molecular interaction networks. Three high scoring networks could be identified. Network-1 (Figure 5) is enriched in lipid metabolism and cell-cell signaling. EGFR (which is upregulated after leptin treatment) is one of the central hub genes of this network. Also a lot of genes involved in this network are connected through important kinases. Expression of these kinases does not change after leptin replacement, but these might be mediators for the signal transduction between the genes which respond to leptin treatment. The transcriptional regulators in the network are *Ets2*, *Xbp1*, *Sap30*, *Nupr1*, *Hmga1*, *Zfp36*, *Maged1* and *Ctnnb1*. Network-2 and 3 are available in supplementary material (File S4: Networks.pdf). Network-2 is enriched in lipid metabolism and cell cycle and involves many cytokines. Network-3 is enriched in cell morphology and most of the genes in this network are connected through *Hnf4a*, *Ifng* and *Htt*.

**Discussion**

Despite the fact that leptin has shown exciting results in the mouse models, the success rate of leptin for the reduction of body weight in humans is very low. This is due mainly to the fact that a very small fraction of the obese human population is leptin deficient, and the most common forms of obesity are associated

**Network-1**

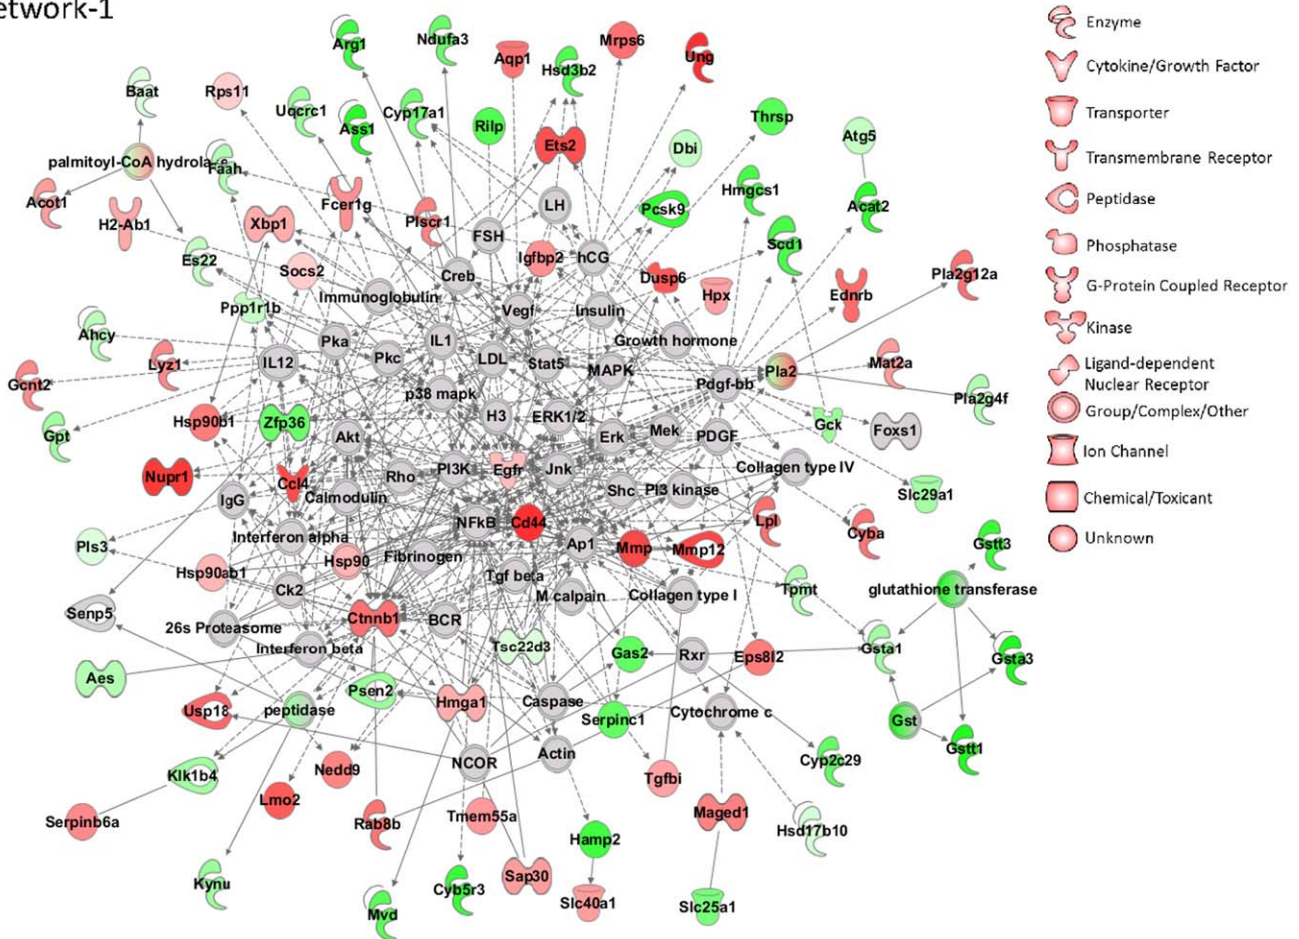

**Figure 5. Top scoring network obtained from network analysis of differentially expressed genes.** Ingenuity Pathway Analysis software was used to construct and visualize molecular interaction networks. doi:10.1371/journal.pone.0012147.g005

with high leptin levels [9]. In such cases, most obese patients are leptin resistant and fail to respond effectively to exogenous leptin [8]. Several defects may contribute to the leptin resistant state, including defective leptin transport across the blood-brain barrier, reduced leptin receptor expression, defects in leptin signal transduction, or the induction of feedback inhibitors [10] [7]. However, if leptin resistance could be by-passed and genes/pathways which respond to leptin treatment could be regulated directly, new therapeutic strategies for the treatment of obesity may be possible. In this study, we determined the global hepatic gene expression profiles after peripheral and central leptin treatment. We found that the effect of central treatment on weight loss was significantly better than peripheral treatment; which confirms that leptin action on weight loss is primarily controlled by a central pathway via hypothalamic relay. We found 214 genes significantly correlated with leptin-mediated weight loss.

Obesity results from the imbalance of energy intake and energy utilization. When energy intake exceeds energy expenditure, excess energy is stored as triglycerides in lipid droplets. Conversely during nutrient deprivation, stored triglycerides are hydrolyzed into fatty acids and converted back to energy. Therefore, metabolic pathways are key regulators of energy balance. In this study, we found that genes which belong to metabolic, catabolic and biosynthetic pathways in mitochondria are highly expressed in *ob/ob* mice when compared with the B6 baseline expression. However, leptin replacement results in the downregulation of these pathways back to normal. The Stearoyl-CoA Desaturase 1 (*Scd1*), which is a lipogenic enzyme involved in fatty acid synthesis and oxidation, is overexpressed in the livers of *ob/ob* mice as compared to B6 and is downregulated after leptin replacement. This is consistent with the results of previous studies which have shown that *Scd1* deficient mice are protected against obesity and insulin resistance [18,19]. Also in humans, genetic variations in the *Scd1* gene were found to be associated with body fat deposition and insulin sensitivity [30]. Some recent studies have used pharmacological inhibition of *Scd1* for treatment of obesity and insulin resistance [31,32]. Glucokinase (*Gck*) phosphorylates glucose to produce glucose-6-phosphate and therefore regulates glucose metabolism. We found that expression of this gene is negatively correlated with leptin-mediated weight loss in *ob/ob* mice. Long-term overexpression of *Gck* increases hepatic lipogenesis and circulating lipids, which leads to insulin resistance [33].

Weight loss also has been linked to GH-IGF1 axis in the literature, which has a critical role in the proliferation and differentiation of adipocytes [34]. IGF-binding proteins (IGFBPs) modulate bioavailability of IGF. In this study we found that *Igfbp2* was highly underexpressed in livers of *ob/ob* mice but was normalized after leptin replacement. Recent studies have shown that overexpression of *Igfbp2* protects against the development of obesity and improves insulin sensitivity [35]. Treatment with recombinant *Igfbp2* impairs 3T3-L1 differentiation and hence adipogenesis [35]. Elevated insulin and body fat have been shown to be associated with decreased *Igfbp1* and *Igfbp2* levels cross-sectionally [36]. A recent study observed markedly lower expression of *Igfbp2* in liver from morbidly obese women [37]. Such studies provide an impetus for investigating the effects of *Igfbp2* for treatment of obesity. However, studies have also shown that *Igfbp2* is overexpressed in a wide spectrum of cancers and IGF-independent effects of *Igfbp2* are emerging [38]. *Igfbp2* expression was significantly higher in breast cancer tissue compared with benign breast tissue and *Igfbp2* inhibition attenuated the associated aggressive phenotype of breast cancer cells both in vitro and in vivo [39]. Overexpression of *Igfbp2* has

also been correlated with glioblastoma [40,41] and lymph node metastasis in patients with invasive breast carcinomas [42]. These findings suggest that further studies are required to evaluate IGF-dependent and -independent functions of *Igfbp2* before choosing *Igfbp2* as a therapeutic target for treatment of obesity.

We found that *Cisd1*, the mitochondrial gene which encodes for the MitoNEET protein, is upregulated in livers of *ob/ob* mice as compared to B6 and could be normalized by leptin. MitoNEET is an iron-containing outer mitochondrial membrane protein that regulates oxidative capacity and is involved in the control of maximal mitochondrial respiratory rates [43]. This protein exists in low levels in preadipocytes, and its expression increases exponentially in differentiated adipocytes. Also, MitoNEET has been identified as a target for the thiazolidinedione class of diabetes drugs that may contribute to lipid lowering and/or antidiabetic actions [44].

Interestingly, the expression of five glutathione S-transferases (*Gsta1*, *Gsta2*, *Gsta3*, *Gstt1*, and *Gstt3*) were significantly down-regulated after leptin administration. In an earlier study it was shown that *Gsta3* expression is markedly induced during adipose conversion, which is virtually undetectable in confluent 3T3-L1 cells under basal conditions [45]. Inhibition of the 3T3-L1 adipogenic program demonstrated that *Gsta3* expression is associated specifically with acquisition of the adipocytic phenotype.

One important finding of this study was the upregulation of hepatic lysosomal pathways, including vesicles and vacuole, after leptin treatment. This finding is consistent with a recent study which has identified the previously unknown role of autophagy in regulating intracellular lipid stores [26]. Starvation causes the induction of autophagy, which delivers intracellular proteins and organelles sequestered in double-membrane vesicles (autophagosomes) to lysosomes for degradation and use as an energy source. It was found that inhibition of autophagy in cultured hepatocytes and mouse liver increased triglyceride storage in lipid droplets.

In conclusion, this study identified key molecular pathways and downstream target genes involved in the leptin-mediated weight loss. Many of these genes have previously been shown to be associated with obesity; however, we also identified a number of novel target genes. Further detailed studies will be required to evaluate the possible use of these genes and the associated protein products as therapeutic targets for the treatment of obesity.

## Supporting Information

**File S1** Top-214 Correlation plots.pdf. Regression plots of 214 genes significantly associated with leptin mediated weight loss. We used LIMMA to test for a linear association between gene expression levels and amount of weight loss (grams).

Found at: doi:10.1371/journal.pone.0012147.s001 (0.93 MB PDF)

**File S2** 214\_Gene\_matrix.xls. Normalized gene expression data of 214 genes significantly associated with leptin mediated weight loss.

Found at: doi:10.1371/journal.pone.0012147.s002 (0.52 MB XLS)

**File S3** Gene Ontology.pdf. Biological processes, molecular functions and cellular compartments of hepatic genes regulated by leptin treatment.

Found at: doi:10.1371/journal.pone.0012147.s003 (0.24 MB PDF)

**File S4** Networks.pdf. Top molecular networks and their biological functions affected by leptin treatment. Network analysis was performed using Ingenuity Pathway Analysis software. Found at: doi:10.1371/journal.pone.0012147.s004 (1.17 MB PDF)

**Table S1** Differentially expressed genes could be sub-divided into two major groups: 116 genes of Cluster-1 and Cluster-2 (group-A), and 98 genes of Cluster-3 and Cluster-4 (group-B). These two groups of genes were separately analyzed and were mapped to cellular compartments and biological functions.

## References

- Zhang Y, Proenca R, Maffei M, Barone M, Leopold L, et al. (1994) Positional cloning of the mouse obese gene and its human homologue. *Nature* 372: 425–432.
- Halaas JL, Boozer C, Blair-West J, Fidathusein N, Denton DA, et al. (1997) Physiological response to long-term peripheral and central leptin infusion in lean and obese mice. *Proc Natl Acad Sci U S A* 94: 8878–8883.
- Chehab FF, Lim ME, Lu R (1996) Correction of the sterility defect in homozygous obese female mice by treatment with the human recombinant leptin. *Nat Genet* 12: 318–320.
- Ducy P, Amling M, Takeda S, Priemel M, Schilling AF, et al. (2000) Leptin inhibits bone formation through a hypothalamic relay: a central control of bone mass. *Cell* 100: 197–207.
- Friedman JM, Halaas JL (1998) Leptin and the regulation of body weight in mammals. *Nature* 395: 763–770.
- Huang W, Dedousis N, O'Doherty RM (2007) Hepatic steatosis and plasma dyslipidemia induced by a high-sucrose diet are corrected by an acute leptin infusion. *J Appl Physiol* 102: 2260–2265.
- Munzberg H (2010) Leptin-signaling pathways and leptin resistance. *Forum Nutr* 63: 123–132.
- Friedman JM (2009) Leptin at 14 y of age: an ongoing story. *Am J Clin Nutr* 89: 973S–979S.
- Maffei M, Halaas J, Ravussin E, Pratley RE, Lee GH, et al. (1995) Leptin levels in human and rodent: measurement of plasma leptin and ob RNA in obese and weight-reduced subjects. *Nat Med* 1: 1155–1161.
- Caro JF, Kolaczynski JW, Nyce MR, Ohannesian JP, Opentanova I, et al. (1996) Decreased cerebrospinal-fluid/serum leptin ratio in obesity: a possible mechanism for leptin resistance. *Lancet* 348: 159–161.
- Choi YH, Li C, Page K, Westby A, la-Fera MA, et al. (2003) Melanocortin receptors mediate leptin effects on feeding and body weight but not adipose apoptosis. *Physiol Behav* 79: 795–801.
- Smyth GK (2004) Linear models and empirical bayes methods for assessing differential expression in microarray experiments. *Stat Appl Genet Mol Biol* 3: Article3.
- Kerr KF (2009) Comments on the analysis of unbalanced microarray data. *Bioinformatics* 25: 2035–2041.
- Benjamini Y, Hochberg Y (1995) Controlling the False Discovery Rate - A Practical and Powerful Approach to Multiple Testing. *Journal of the Royal Statistical Society Series B-Methodological* 57: 289–300.
- Sharma A, Podolsky R, Zhao J, McIndoe RA (2009) A modified hyperplane clustering algorithm allows for efficient and accurate clustering of extremely large datasets. *Bioinformatics* 25: 1152–1157.
- Zhang B, Schmoyer D, Kirov S, Snoddy J (2004) GOTree Machine (GOTM): a web-based platform for interpreting sets of interesting genes using Gene Ontology hierarchies. *Bmc Bioinformatics* 5.
- Boutlier RG (2001) Mechanisms of cell survival in hypoxia and hypothermia. *J Exp Biol* 204: 3171–3181.
- Cohen P, Miyazaki M, Soccì ND, Hagge-Greenberg A, Liedtke W, et al. (2002) Role for stearoyl-CoA desaturase-1 in leptin-mediated weight loss. *Science* 297: 240–243.
- Ntambi JM, Miyazaki M, Stoehr JP, Lan H, Kendzierski CM, et al. (2002) Loss of stearoyl-CoA desaturase-1 function protects mice against adiposity. *Proc Natl Acad Sci U S A* 99: 11482–11486.
- Hirota K, Sakamaki J, Ishida J, Shimamoto Y, Nishihara S, et al. (2008) A combination of HNF-4 and Foxo1 is required for reciprocal transcriptional regulation of glucokinase and glucose-6-phosphatase genes in response to fasting and feeding. *J Biol Chem* 283: 32432–32441.
- Inoue Y, Hayhurst GP, Inoue J, Mori M, Gonzalez FJ (2002) Defective ureagenesis in mice carrying a liver-specific disruption of hepatocyte nuclear factor 4alpha (HNF4alpha). HNF4alpha regulates ornithine transcarbamylase in vivo. *J Biol Chem* 277: 25257–25265.
- Failla ML, Kennedy ML, Chen ML (1988) Iron metabolism in genetically obese (ob/ob) mice. *J Nutr* 118: 46–51.
- Le GG, Chanseaux E, Ruivard M, Morio B, Mazur A (2007) Study of iron metabolism disturbances in an animal model of insulin resistance. *Diabetes Res Clin Pract* 77: 363–370.
- Loh K, Deng H, Fukushima A, Cai X, Boivin B, et al. (2009) Reactive oxygen species enhance insulin sensitivity. *Cell Metab* 10: 260–272.
- Ramani K, Yang H, Xia M, Ara AI, Mato JM, et al. (2008) Leptin's mitogenic effect in human liver cancer cells requires induction of both methionine adenosyltransferase 2A and 2beta. *Hepatology* 47: 521–531.
- Singh R, Kaushik S, Wang Y, Xiang Y, Novak I, et al. (2009) Autophagy regulates lipid metabolism. *Nature* 458: 1131–1135.
- Lago F, Dieguez C, Gomez-Reino J, Gualillo O (2007) Adipokines as emerging mediators of immune response and inflammation. *Nat Clin Pract Rheumatol* 3: 716–724.
- Batra A, Okur B, Glauben R, Erben U, Ihbe J, et al. (2010) Leptin: a critical regulator of CD4+ T-cell polarization in vitro and in vivo. *Endocrinology* 151: 56–62.
- Prada PO, Ropelle ER, Mourao RH, de Souza CT, Pauli JR, et al. (2009) EGFR tyrosine kinase inhibitor (PD153035) improves glucose tolerance and insulin action in high-fat diet-fed mice. *Diabetes* 58: 2910–2919.
- Warrenjo E, Ingelsson E, Lundmark P, Lamnfeldt L, Syvanen AC, et al. (2007) Polymorphisms in the SCD1 gene: associations with body fat distribution and insulin sensitivity. *Obesity (Silver Spring)* 15: 1732–1740.
- Li CS, Belair L, Guay J, Murgasva R, Sturkenboom W, et al. (2009) Thiazole analog as stearoyl-CoA desaturase 1 inhibitor. *Bioorg Med Chem Lett* 19: 5214–5217.
- Issandou M, Bouillot A, Brusq JM, Forest MC, Grillot D, et al. (2009) Pharmacological inhibition of stearoyl-CoA desaturase 1 improves insulin sensitivity in insulin-resistant rat models. *Eur J Pharmacol* 618: 28–36.
- Ferre T, Riu E, Franckhauser S, Agudo J, Bosch F (2003) Long-term overexpression of glucokinase in the liver of transgenic mice leads to insulin resistance. *Diabetologia* 46: 1662–1668.
- Hausman DB, DiGirolamo M, Bartness TJ, Hausman GJ, Martin RJ (2001) The biology of white adipocyte proliferation. *Obes Rev* 2: 239–254.
- Wheatcroft SB, Kearney MT, Shah AM, Ezzat VA, Miell JR, et al. (2007) IGF-binding protein-2 protects against the development of obesity and insulin resistance. *Diabetes* 56: 285–294.
- Ahmed RL, Thomas W, Schmitz KH (2007) Interactions between insulin, body fat, and insulin-like growth factor axis proteins. *Cancer Epidemiol Biomarkers Prev* 16: 593–597.
- Elam MB, Cowan GS Jr, Rooney RJ, Hiler ML, et al. (2009) Hepatic gene expression in morbidly obese women: implications for disease susceptibility. *Obesity (Silver Spring)* 17: 1563–1573.
- Wheatcroft SB, Kearney MT (2009) IGF-dependent and IGF-independent actions of IGF-binding protein-1 and -2: implications for metabolic homeostasis. *Trends Endocrinol Metab* 20: 153–162.
- So AI, Levitt RJ, Eigel B, Fazli L, Muramaki M, et al. (2008) Insulin-like growth factor binding protein-2 is a novel therapeutic target associated with breast cancer. *Clin Cancer Res* 14: 6944–6954.
- Fukushima T, Kataoka H (2007) Roles of insulin-like growth factor binding protein-2 (IGFBP-2) in glioblastoma. *Anticancer Res* 27: 3685–3692.
- Marucci G, Morandi L, Magrini E, Farnedi A, Franceschi E, et al. (2008) Gene expression profiling in glioblastoma and immunohistochemical evaluation of IGFBP-2 and CDC20. *Virchows Arch* 453: 599–609.
- Wang H, Arun BK, Wang H, Fuller GN, Zhang W, et al. (2008) IGFBP2 and IGFBP5 overexpression correlates with the lymph node metastasis in T1 breast carcinomas. *Breast J* 14: 261–267.
- Wiley SE, Murphy AN, Ross SA, van der GP, Dixon JE (2007) MitoNEET is an iron-containing outer mitochondrial membrane protein that regulates oxidative capacity. *Proc Natl Acad Sci U S A* 104: 5318–5323.
- Colca JR, McDonald WG, Waldon DJ, Leone JW, Lull JM, et al. (2004) Identification of a novel mitochondrial protein (“mitoNEET”) cross-linked specifically by a thiazolidinedione photoprobe. *Am J Physiol Endocrinol Metab* 286: E252–E260.
- Jowsey IR, Smith SA, Hayes JD (2003) Expression of the murine glutathione S-transferase alpha3 (GSTA3) subunit is markedly induced during adipocyte differentiation: activation of the GSTA3 gene promoter by the pro-adipogenic cicosanoid 15-deoxy-Delta12,14-prostaglandin J2. *Biochem Biophys Res Commun* 312: 1226–1235.
