# Supplementary material for: Hepatic Gene Expression Profiling Reveals Key Pathways Involved in Leptin-Mediated Weight Loss in ob/ob Mice
Source: PubMed Central journal article supplement (PMC2922341; doi:10.1371/journal.pone.0012147), 2010-08-16

**Supplementary data: Regression plots of 214 genes significantly associated with leptin mediated weight loss.**

We used LIMMA to test for a linear association between gene expression levels and amount of weight loss (grams), using the amount of weight loss in a linear model and testing for the significance of the regression coefficient for weight loss. We used the false discovery rate (FDR) adjust for multiple testing. B-statistics (the log of the odds of a gene showing either any association with weight loss) were calculated for each gene. Duplicate genes, when present, were removed and their expression levels averaged across the duplicates. A total of 221 probes representing 214 unique genes were found significantly correlated with weight loss.

Regression plots of 214 are shown below. Blue open circle is vehicle subcutaneous treatment (VEH\_SQ); Blue filled circle is leptin subcutaneous treatment (LEP\_SQ); Red open circle is vehicle intracerebroventricular treatment (VEH\_ICV); Red filled circle is leptin intracerebroventricular treatment (LEP\_ICV); Red crossed circle represents four animals in which the cannula may not have been in place or treatment did not work (LEP\_ICVN). While analyzing the phenotype data, we found that there was no weight loss in these four animals. Sectioning of the brain could not confirm placement of the cannula in these animals. The expression of these animals is very similar to the vehicle treated animals.

### Scd1

p-value =  $3.3e-07$

logFC = -0.174

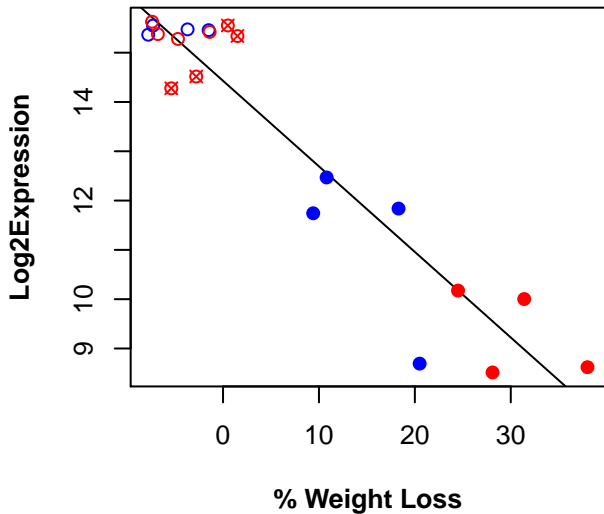





### Ahcy

p-value = 7.94e-05

logFC = -0.069

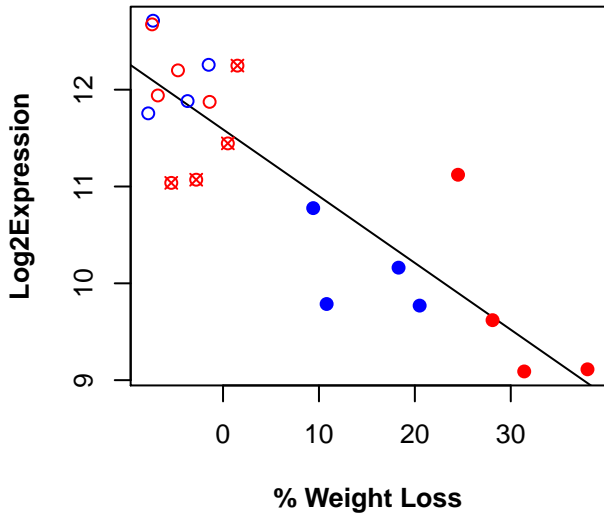

### Lrtm1

p-value = 6.44e-05

logFC = -0.068

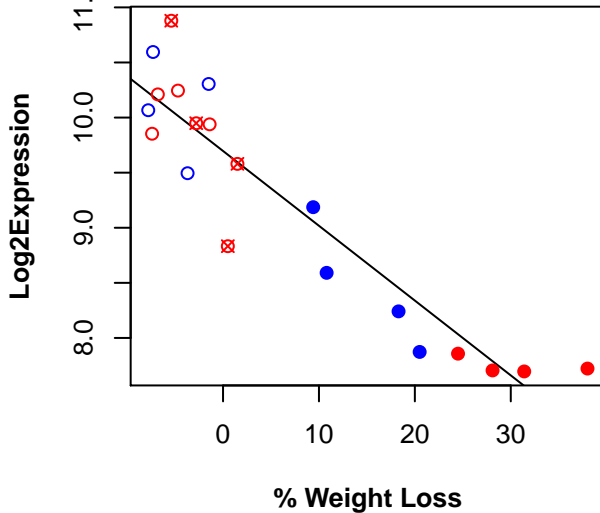

### Sardh

p-value = 0.0017663

logFC = -0.065

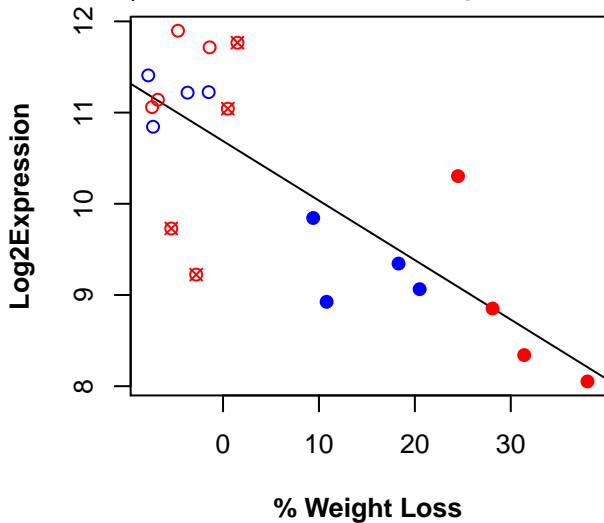

### Acot1

p-value = 0.00073945

logFC = 0.063

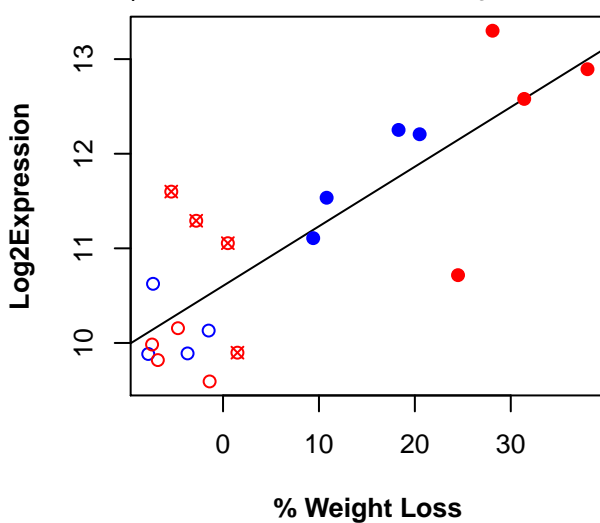

### Rdh16

p-value = 5.65e-06

logFC = -0.062

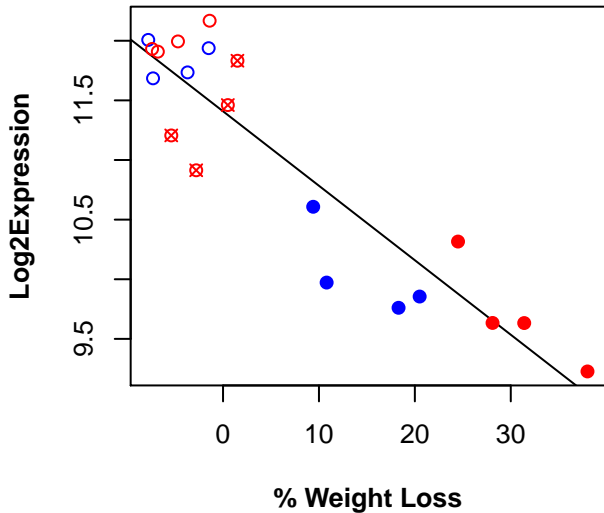

### Nnmt

p-value = 0.00252284

logFC = -0.061

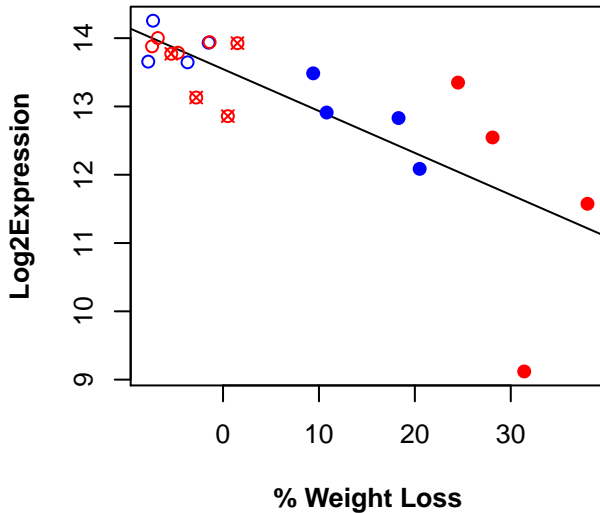

### Haoa

p-value = 0.00050194

logFC = -0.061

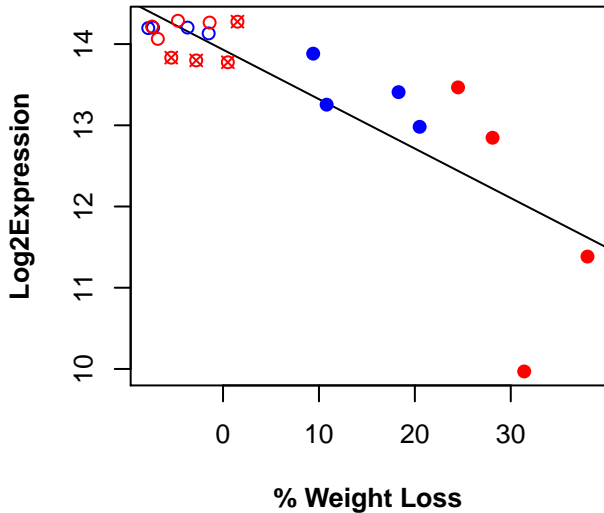

### Serpina7

p-value = 3.11e-05

logFC = 0.061

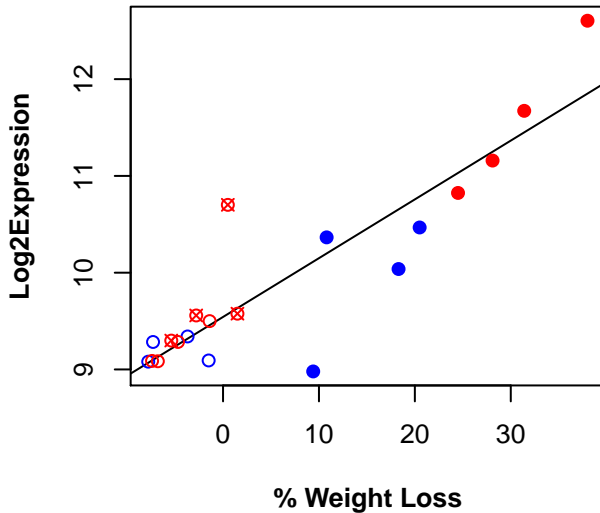

### Nupr1

p-value = 0.00049085

logFC = 0.06

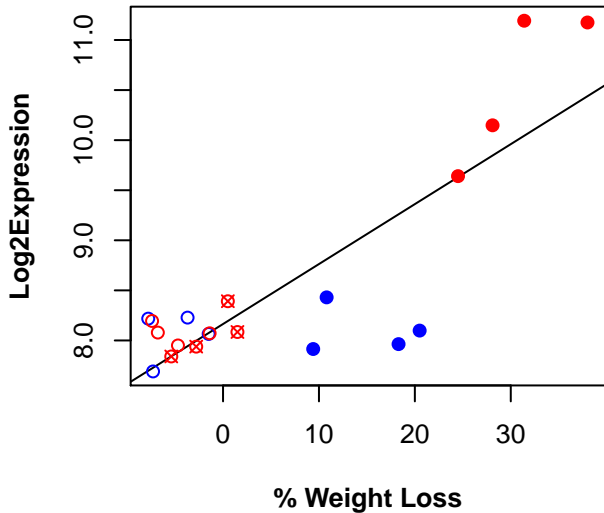

### Uap111

p-value = 0.00213121

logFC = 0.059

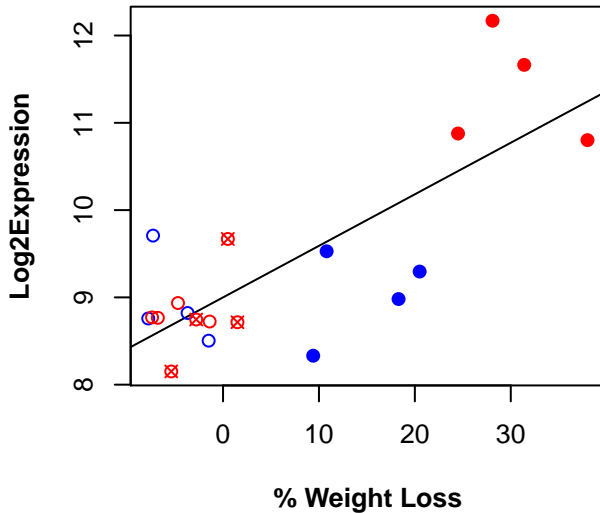

### Tmie

p-value = 0.00010935

logFC = -0.059

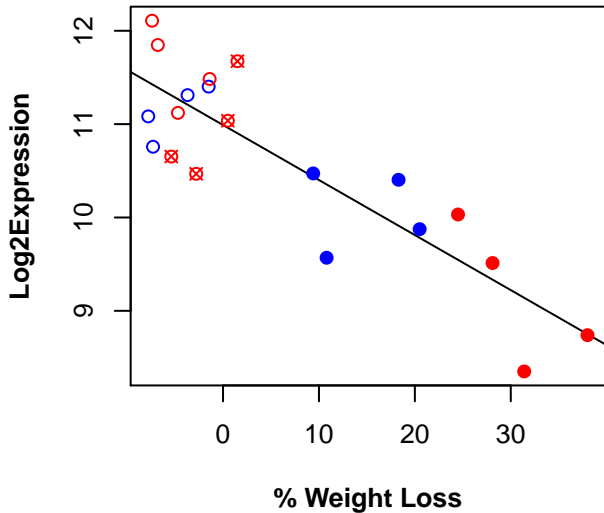

### Lyz

p-value = 0.00010733

logFC = 0.059

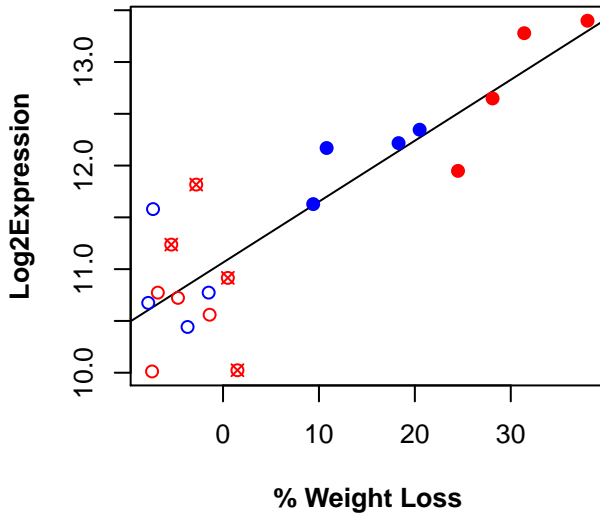

### Aass

p-value = 0.00094204      logFC = -0.057

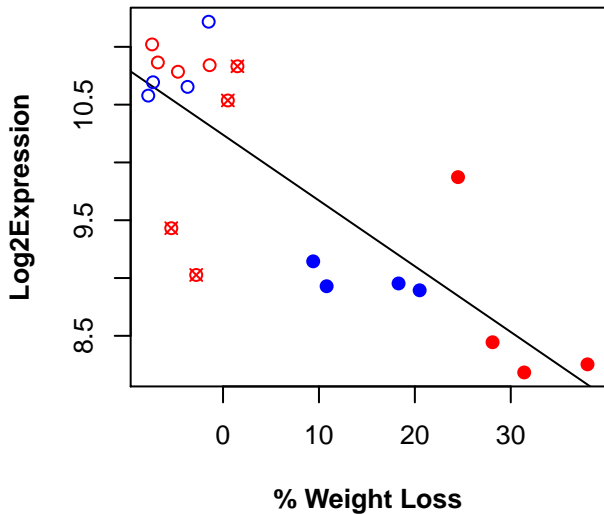

### Bhmt

p-value = 0.00069618      logFC = -0.056

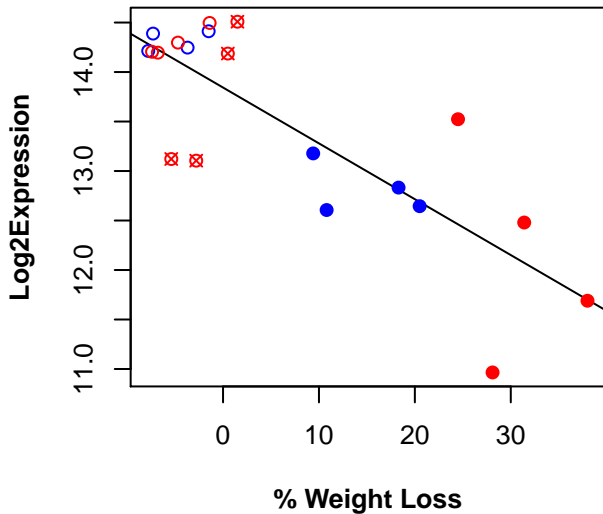

### Hpd

p-value = 0.00123493      logFC = -0.056

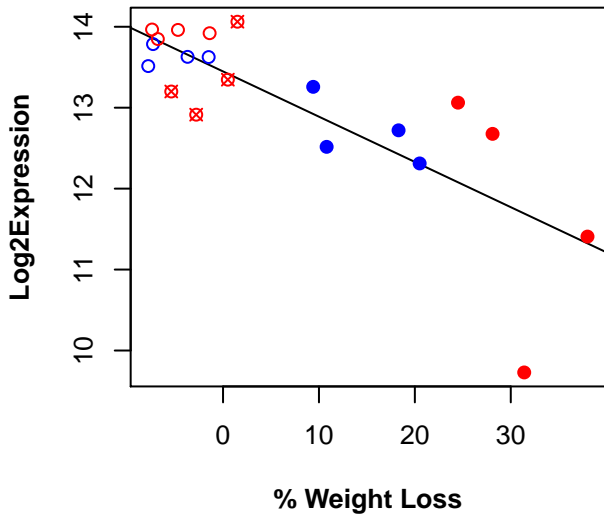

### Prodh

p-value = 2.57e-05      logFC = -0.056

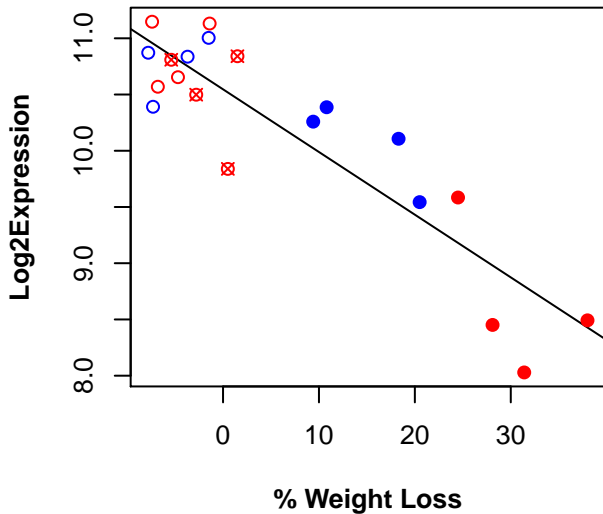



### Olig1

p-value = 2.86e-06 logFC = -0.055

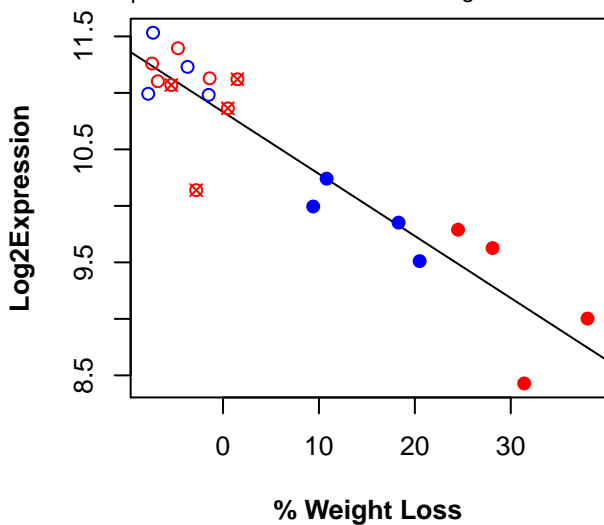

### Gck

p-value = 0.00011358 logFC = -0.055

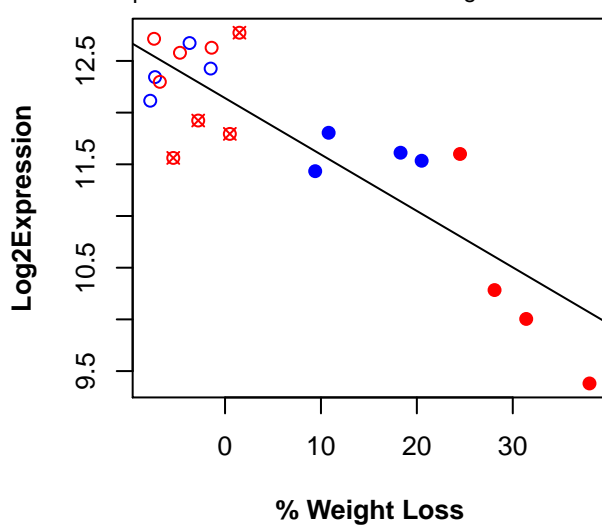



### Rcan2

p-value = 8.09e-05

logFC = -0.052

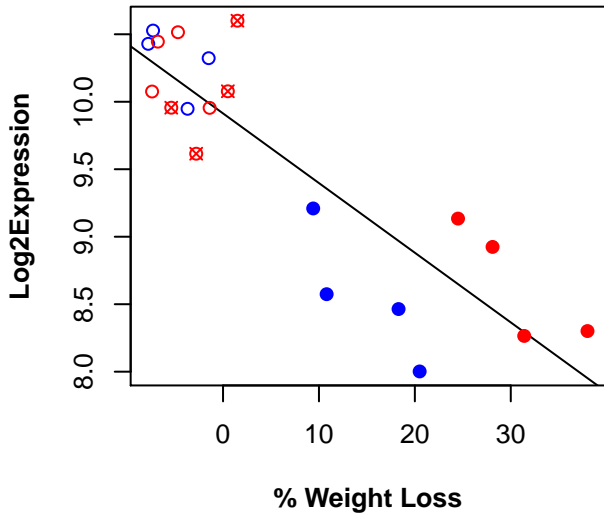

### Gls2

p-value = 0.00145

logFC = -0.051

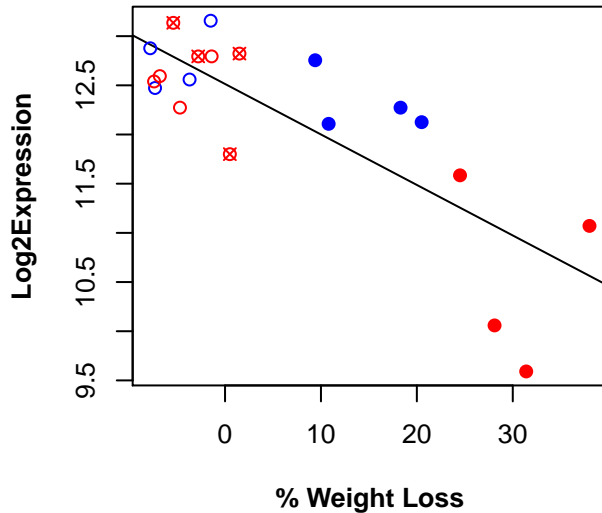

### Uroc1

p-value = 6.63e-05

logFC = -0.051

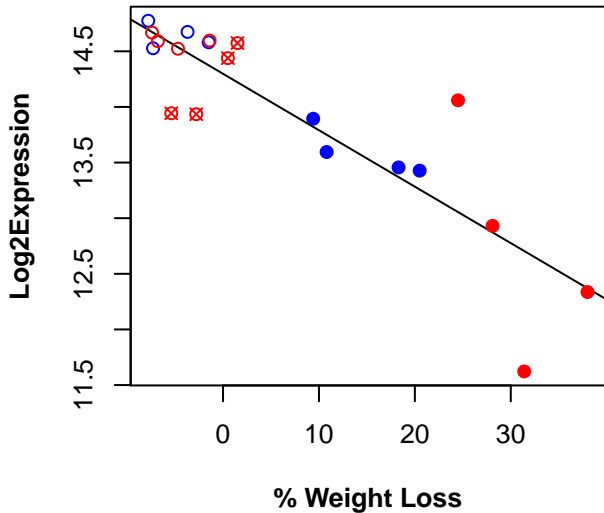

### Mmd2

p-value = 0.00030911

logFC = -0.05

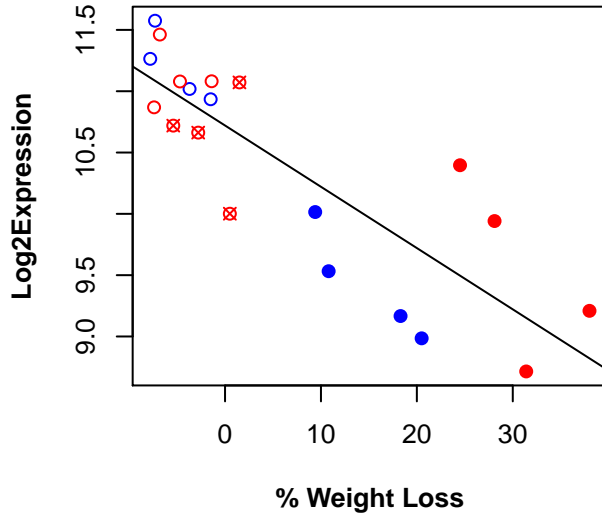





### Mmp12

p-value = 0.00098819

logFC = 0.048

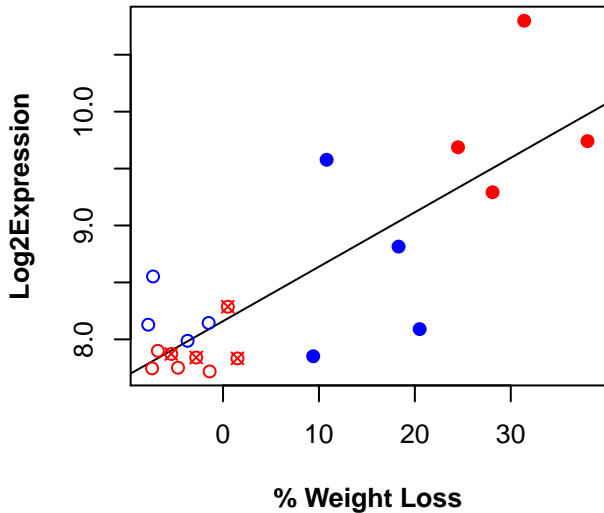

### Gamt

p-value = 0.00034435

logFC = -0.048

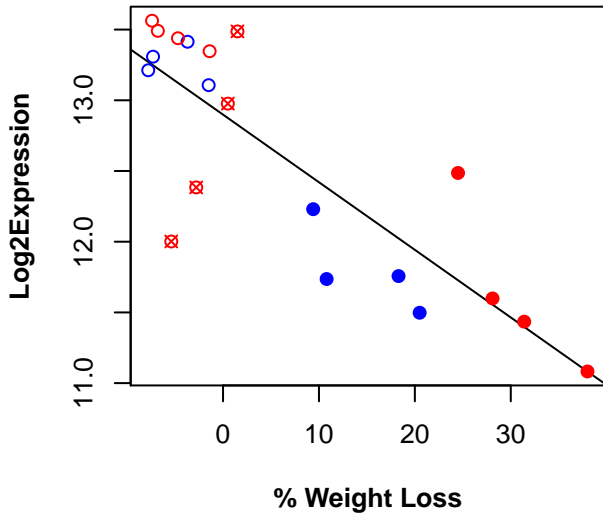

### Cyp2c29

p-value = 0.00189248

logFC = -0.048

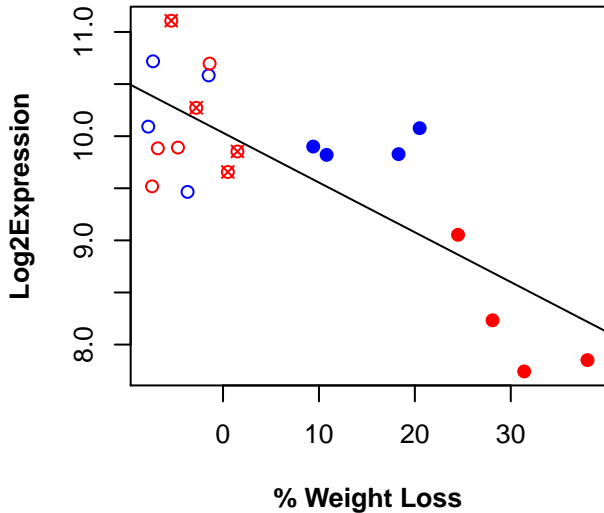

### **Snhg11**

p-value = 0.00031384      logFC = -0.047

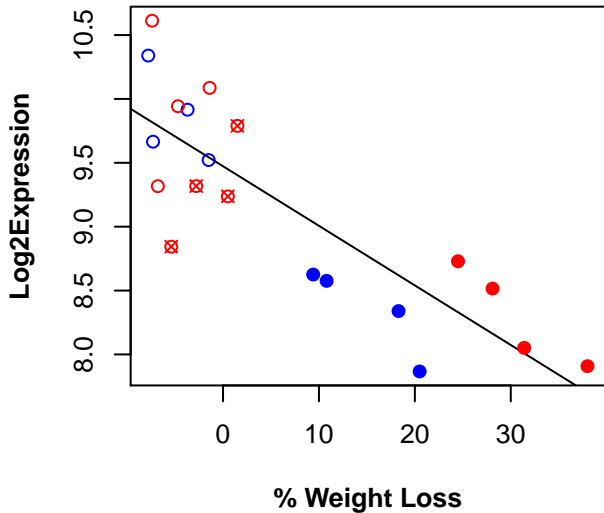

### **Slc25a1**

p-value = 2.96e-05      logFC = -0.046

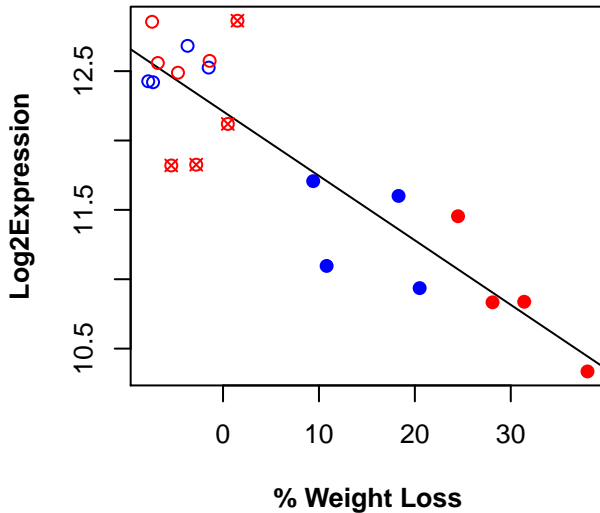

### **Aes**

p-value = 0.00031538      logFC = -0.046

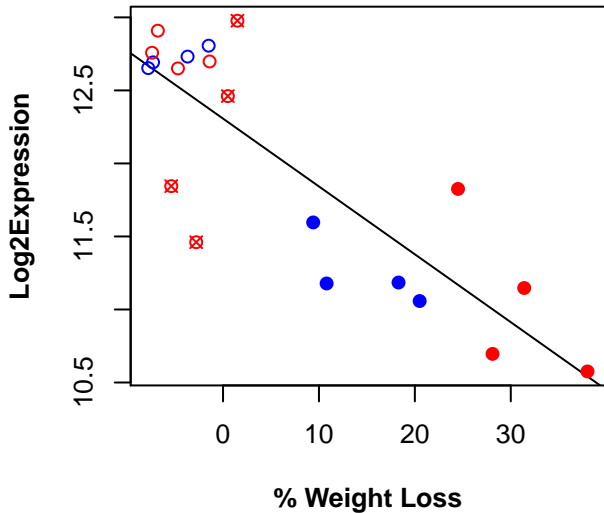

### **LOC100040592**

p-value = 6.89e-05      logFC = -0.046

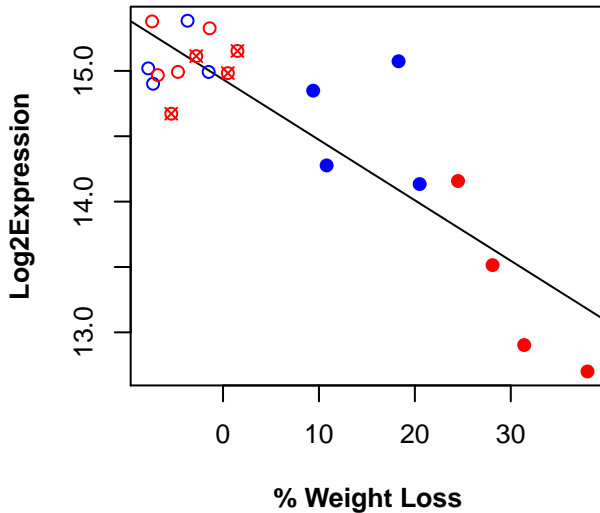





### Aadacl1

p-value = 3.25e-05

logFC = 0.045

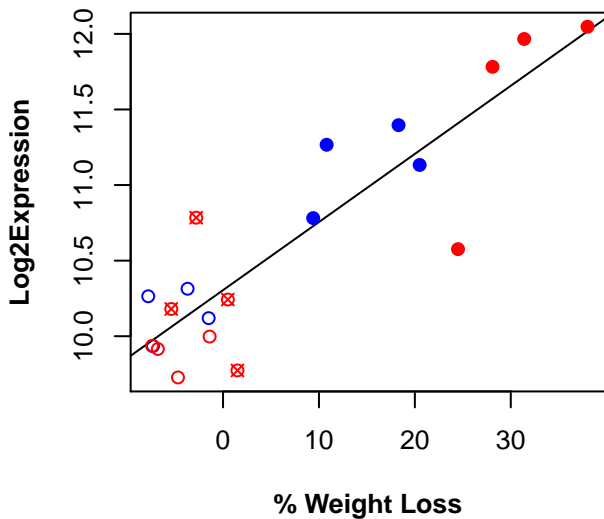

### Arg1

p-value = 0.00013648

logFC = -0.044

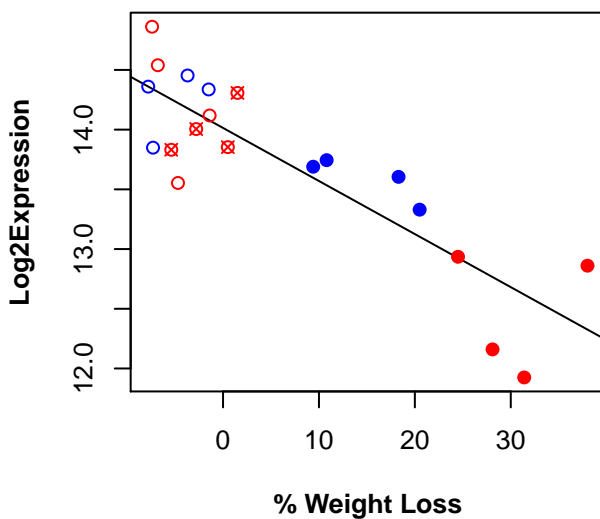

### Slc25a33

p-value = 0.00027052

logFC = 0.043

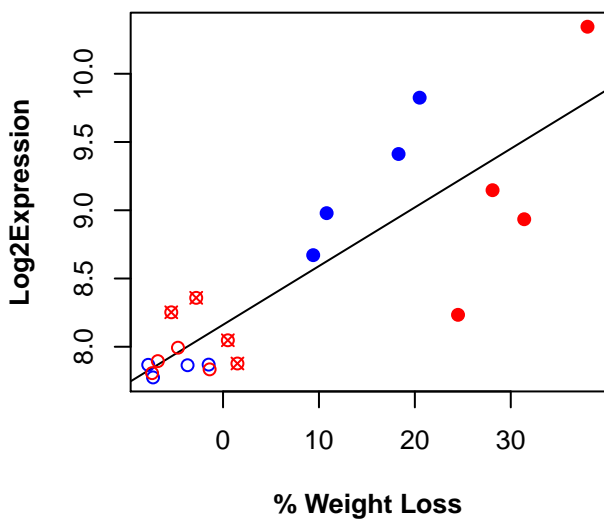

### Spata2L

p-value = 0.00252103

logFC = -0.043

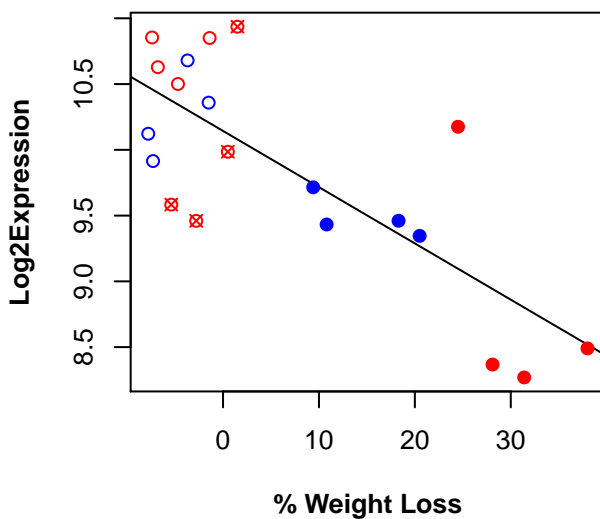

### Hadhb

p-value = 0.00034435

logFC = 0.042

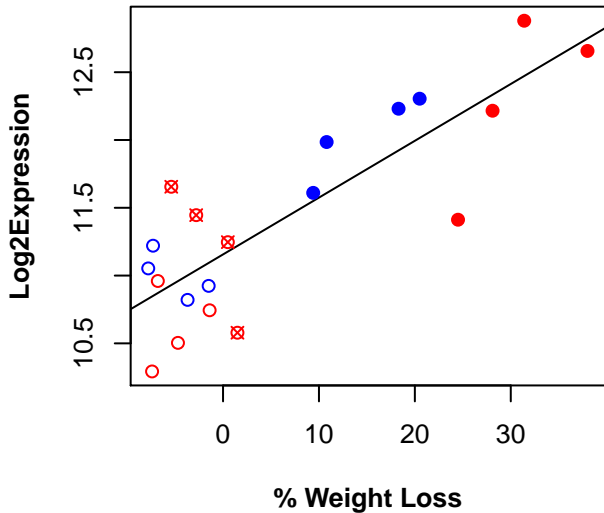

### Gsta3

p-value = 5.52e-05

logFC = -0.042

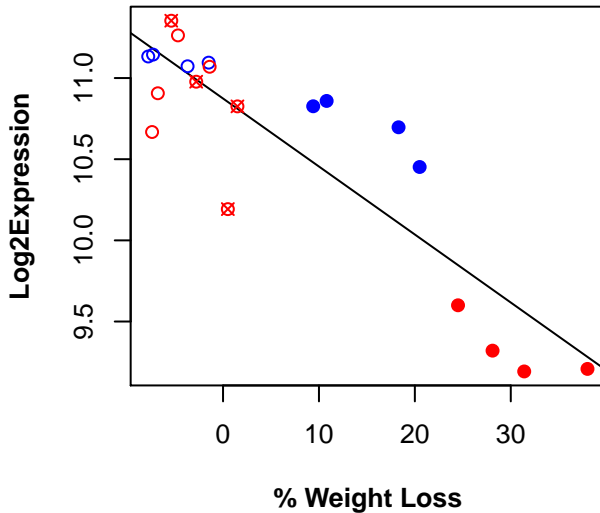

### H2-Ab1

p-value = 0.00153391

logFC = 0.042

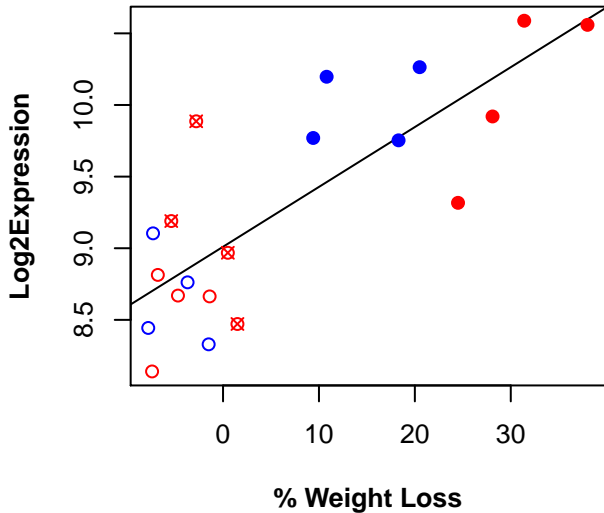

### Pls3

p-value = 0.00220641

logFC = -0.041

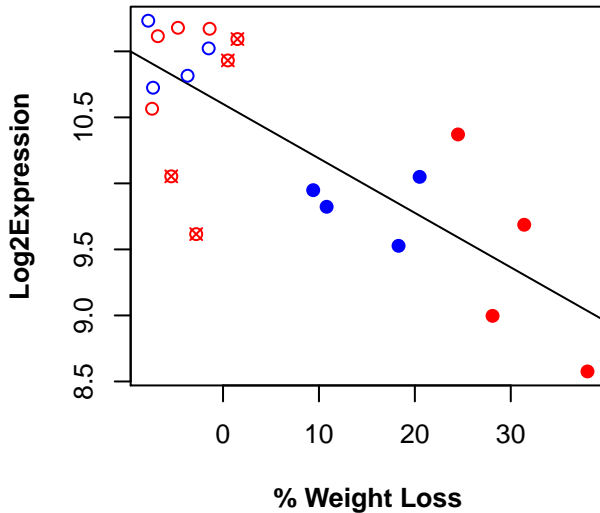

### 9130409I23Rik

p-value = 0.00115556      logFC = -0.041

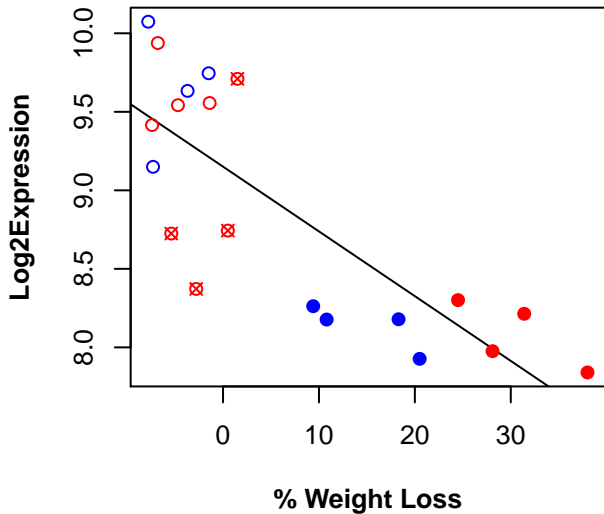

### Dbndd2

p-value = 0.00070274      logFC = 0.041

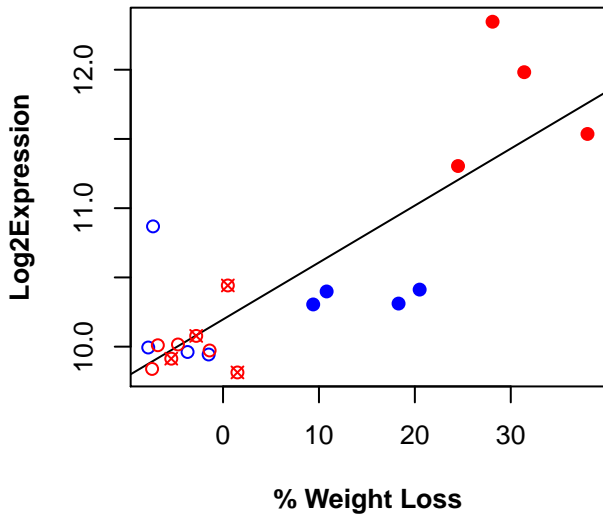

### Dcxr

p-value = 0.00019154      logFC = -0.041

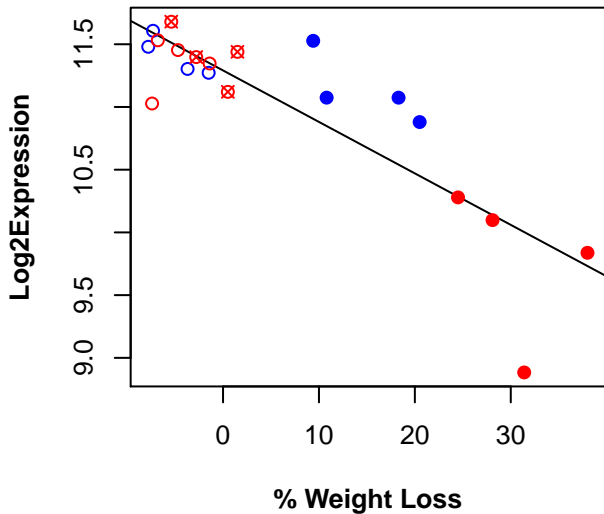

### Hsd17b10

p-value = 0.00012523      logFC = -0.041

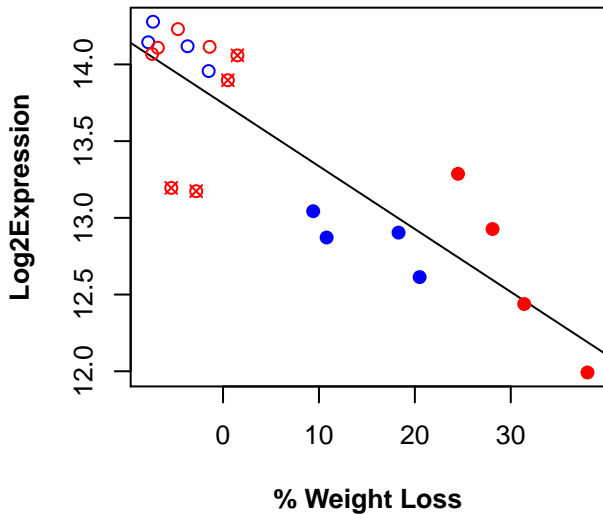

### Fn3k

p-value = 0.00017901

logFC = -0.04

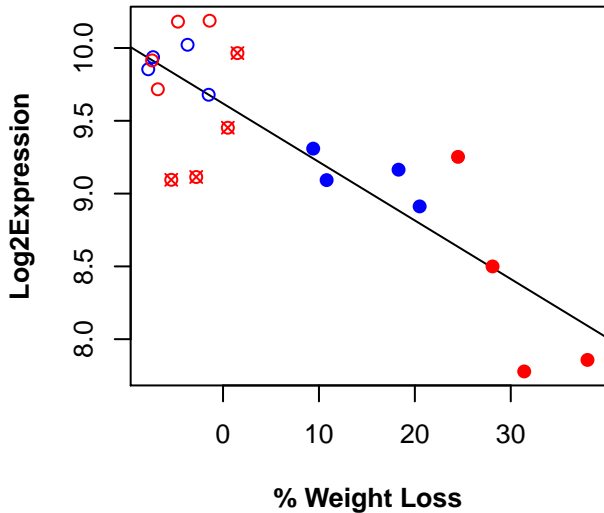

### Es22

p-value = 0.00073945

logFC = -0.04

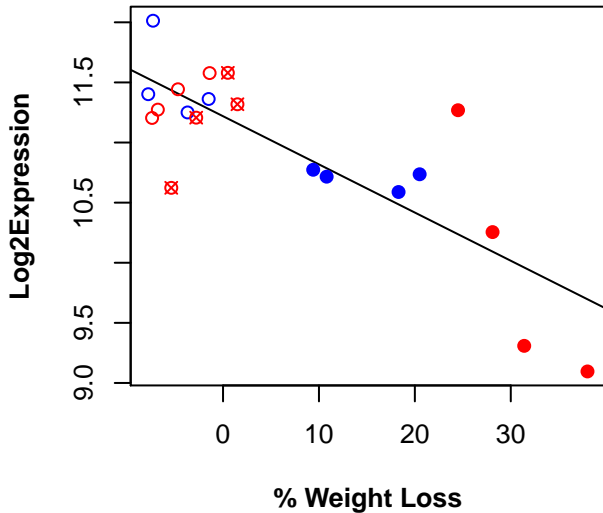

### Gpsn2

p-value = 6.14e-06

logFC = -0.039

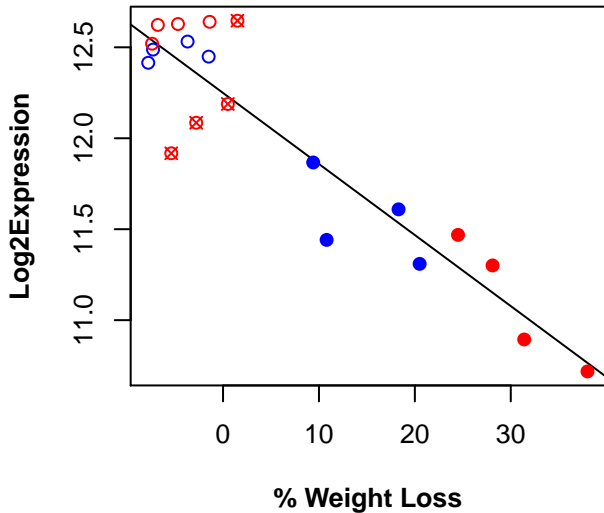

### Mvd

p-value = 0.00017351

logFC = -0.039

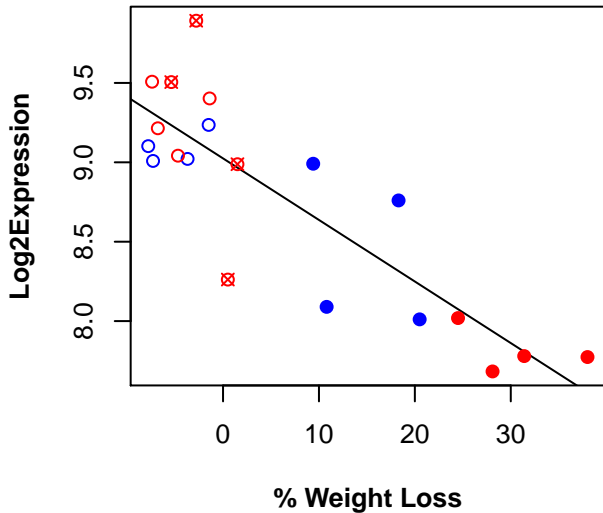

### Slc40a1

p-value = 0.00116607      logFC = 0.038

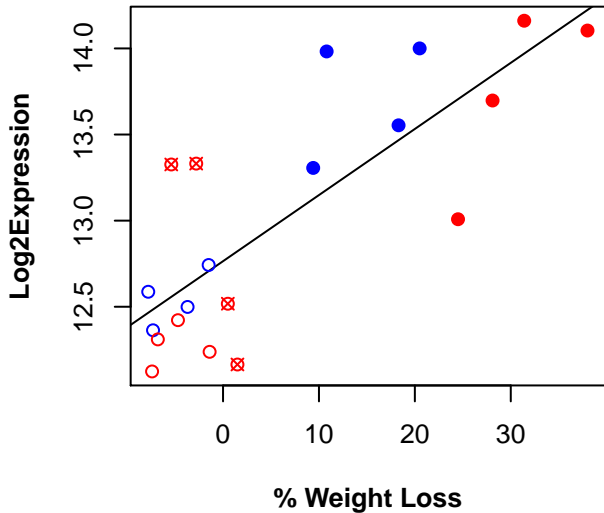

### Ass1

p-value = 0.00166364      logFC = -0.038

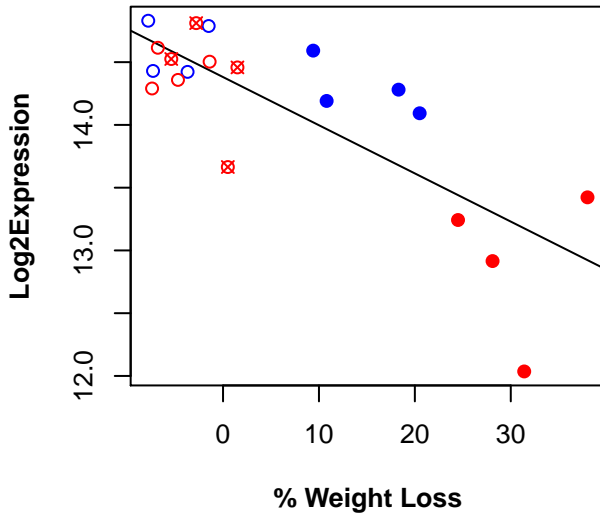

### Tgfb1

p-value = 0.00012755      logFC = 0.038

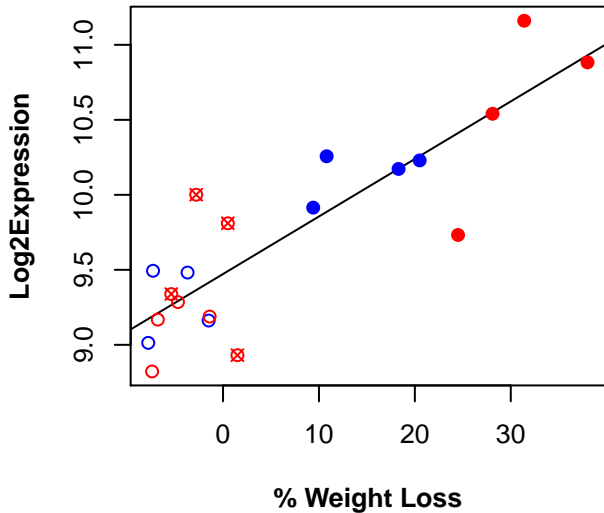

### Serpinb6a

p-value = 6.76e-05      logFC = 0.038

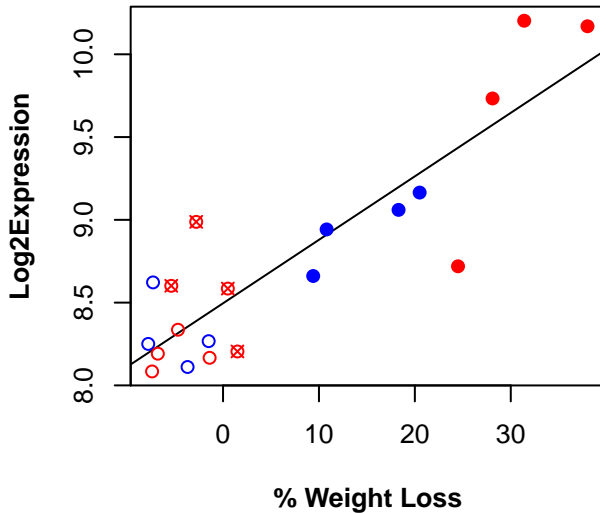

### Mfsd2

p-value = 0.00122645      logFC = -0.038

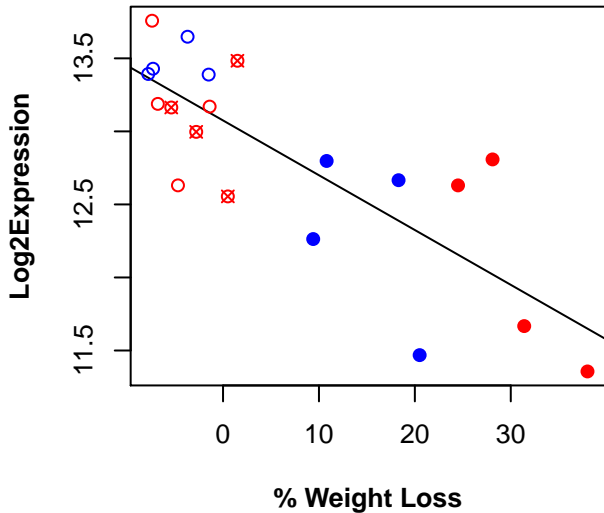

### Ung

p-value = 0.00020983      logFC = 0.037

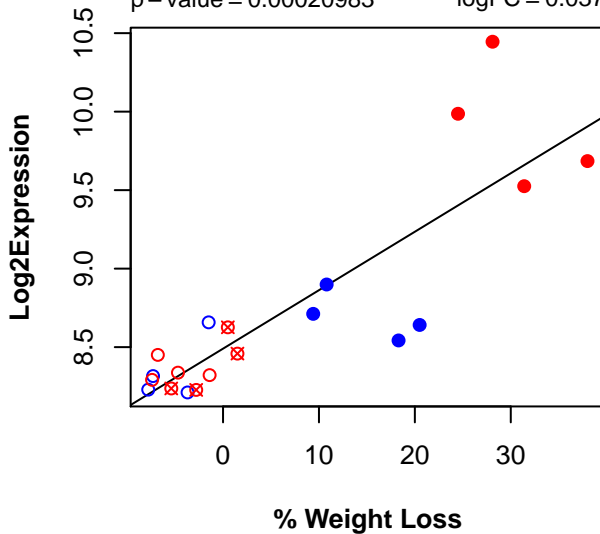

### Otc

p-value = 0.00202876      logFC = -0.037

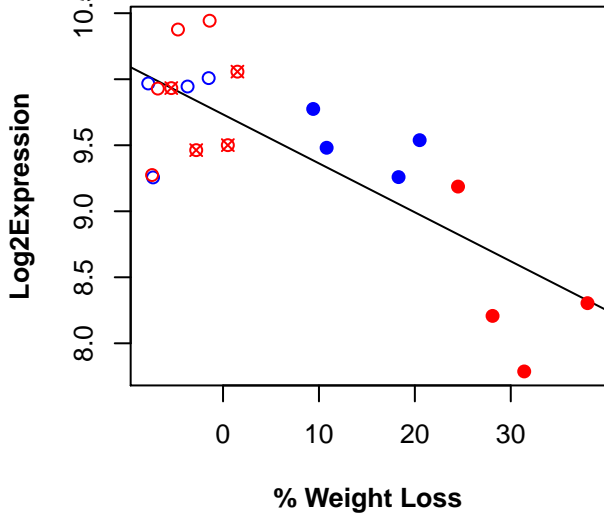

### Tmsb4x

p-value = 0.00016065      logFC = 0.037

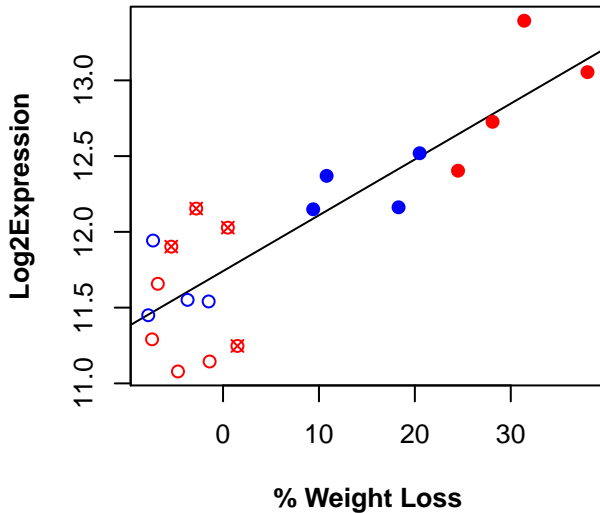

### Slc6a12

p-value = 0.00107959 logFC = -0.037

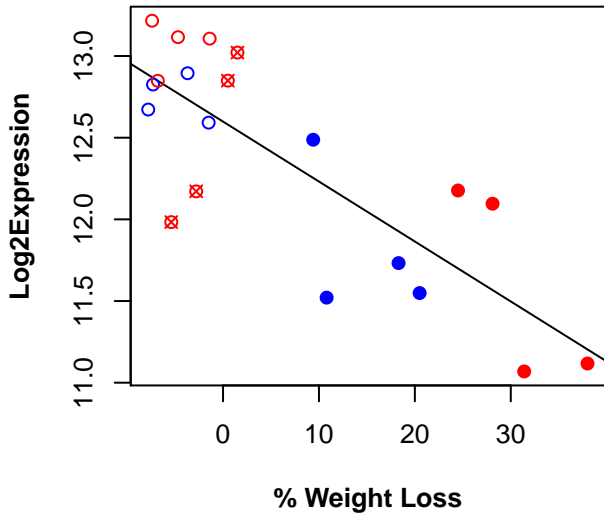

### Acat2

p-value = 8.77e-06 logFC = -0.037

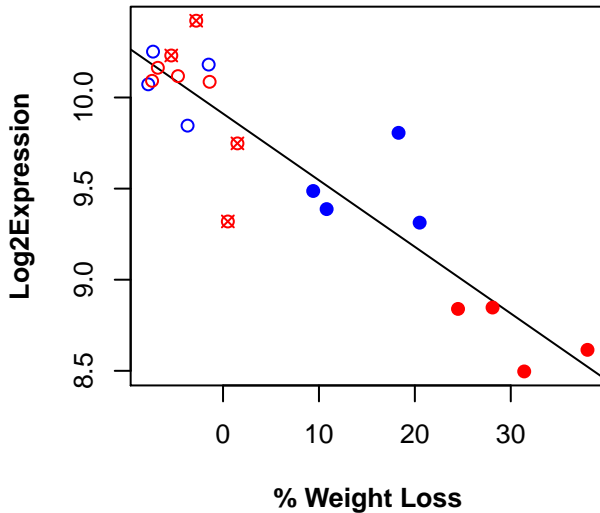

### Cisd1

p-value = 0.00116607 logFC = -0.036

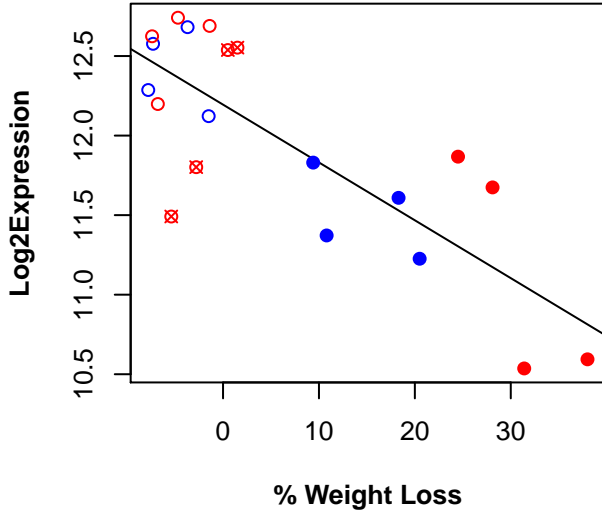



### Snx10

p-value = 0.00161689

logFC = 0.036

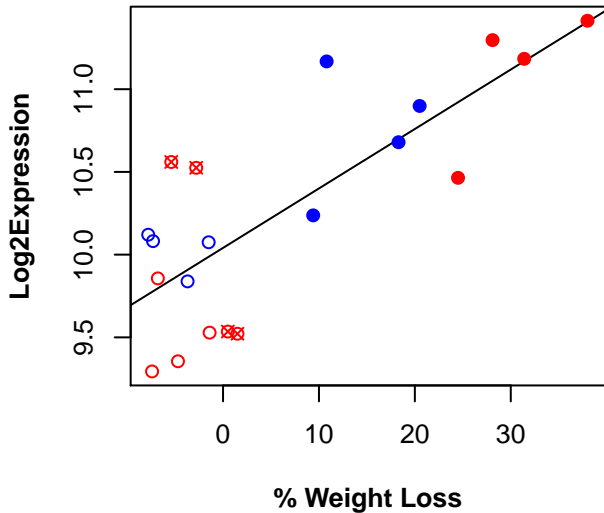

### Slc44a1

p-value = 5.28e-05

logFC = -0.036

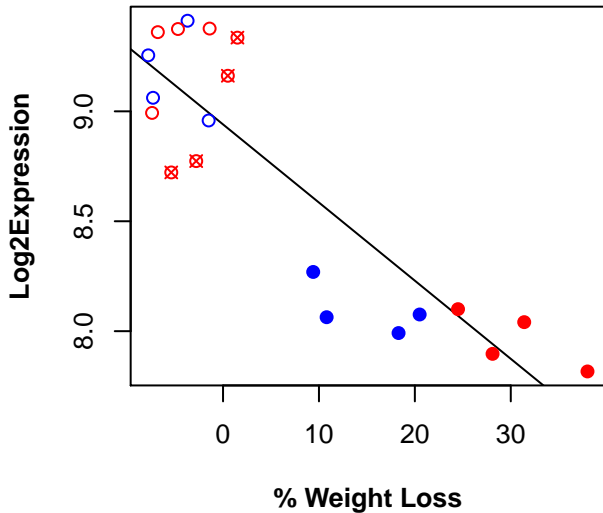

### Ttc36

p-value = 0.00048058

logFC = -0.035

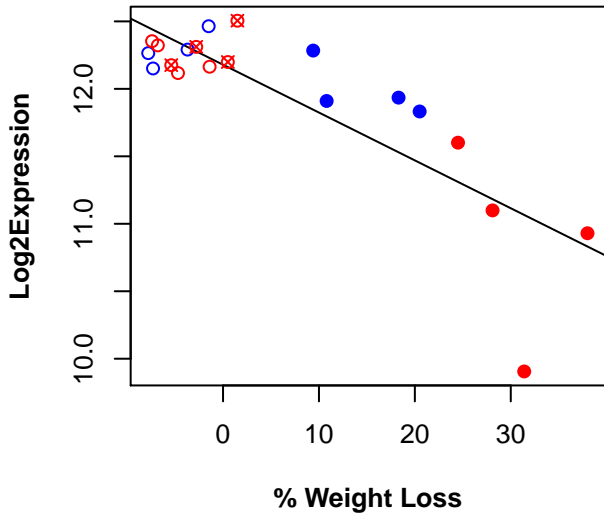

### Fam158a

p-value = 0.00198001

logFC = -0.035

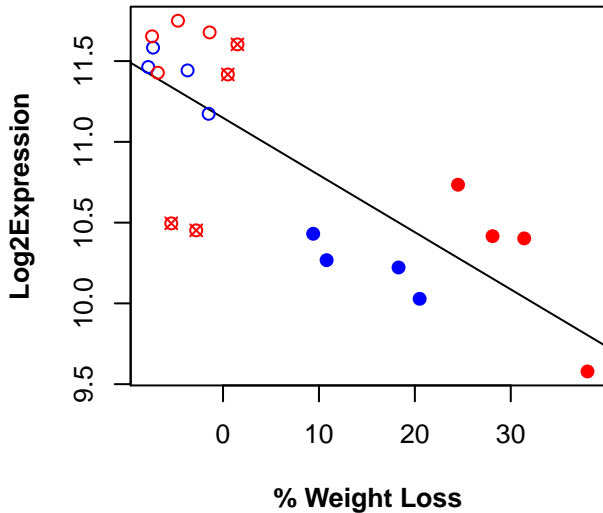

### C530044N13Rik

p-value = 0.00223245      logFC = -0.035

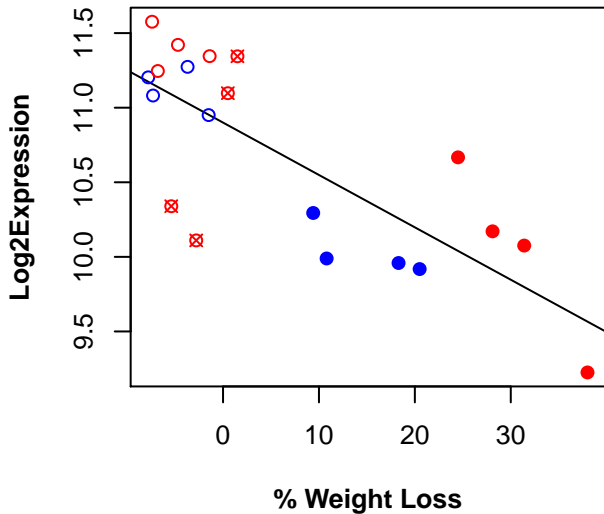

### Dusp6

p-value = 0.00013148      logFC = 0.035

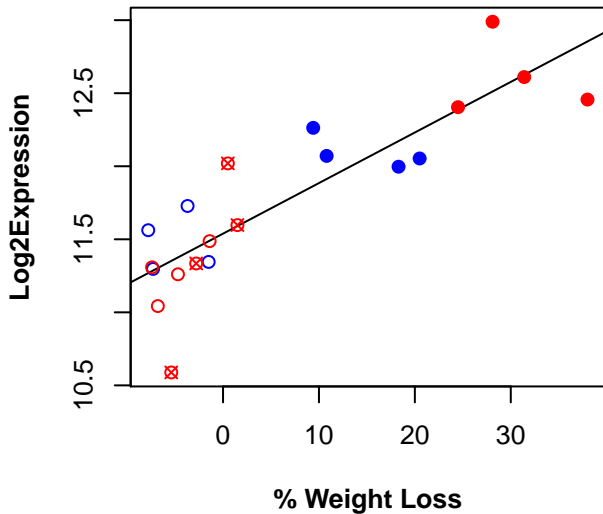

### Slco2b1

p-value = 3.51e-05      logFC = -0.034

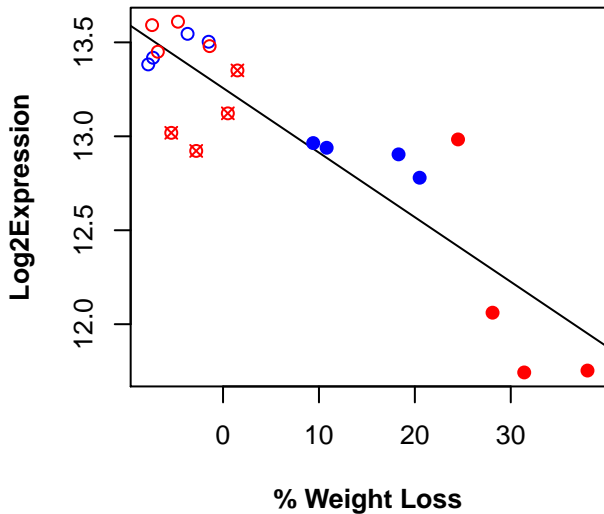

### Psen2

p-value = 7.47e-05      logFC = -0.034

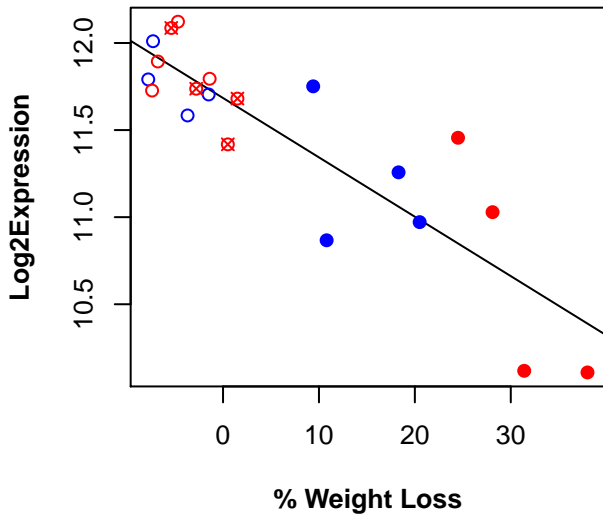











### Hsp90b1

p-value = 0.00016672 logFC = 0.03

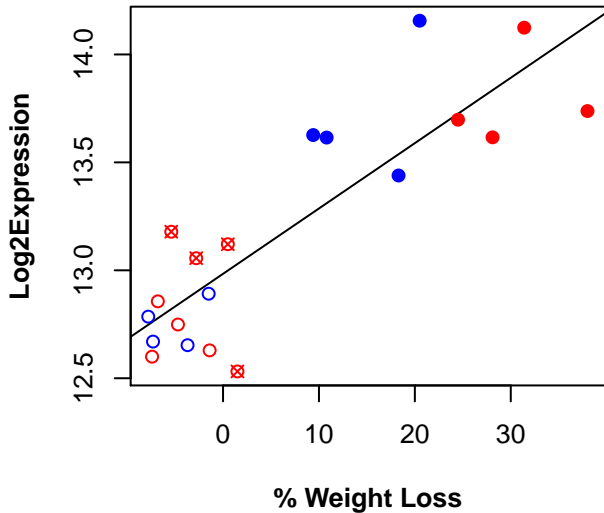

### Aldh6a1

p-value = 0.00036181 logFC = -0.03

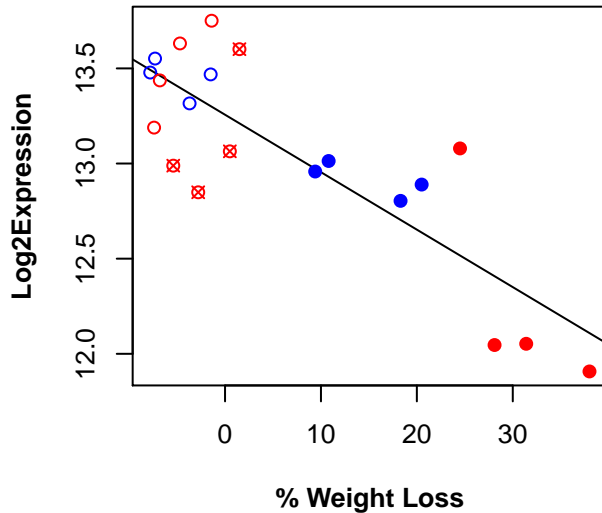

### Gcdh

p-value = 0.00021122 logFC = -0.03

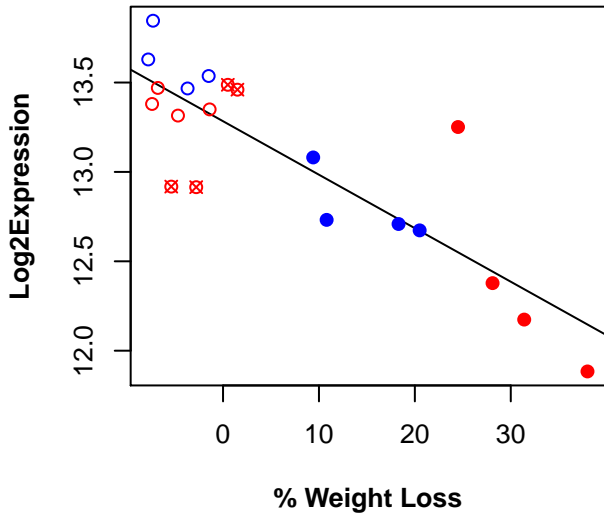

### Clcn2

p-value = 0.0005838 logFC = -0.03

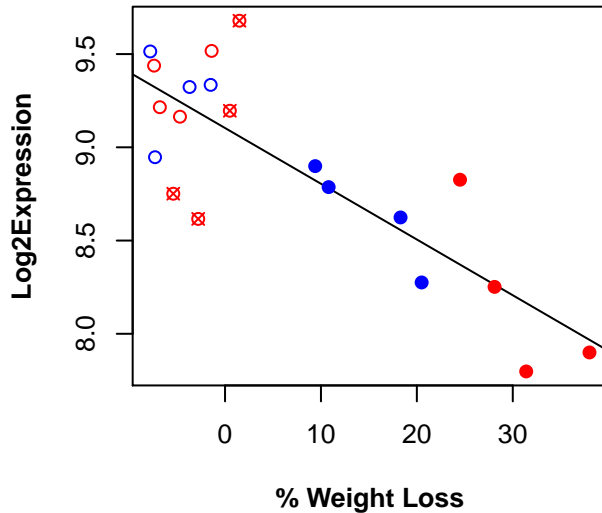



### Tsc22d3

p-value = 0.00185965

logFC = -0.03

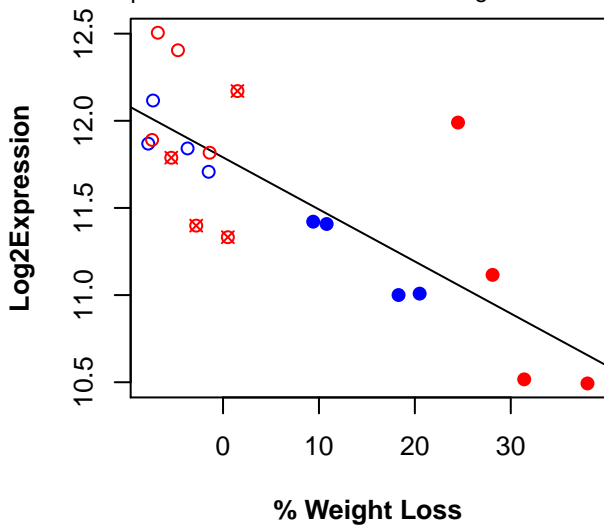

### Nipsnap1

p-value = 1.01e-06

logFC = -0.03

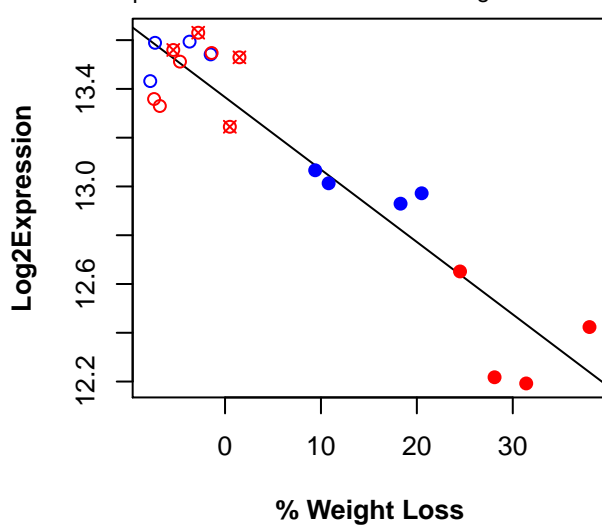

### Hsp90ab1

p-value = 0.0016255

logFC = 0.029

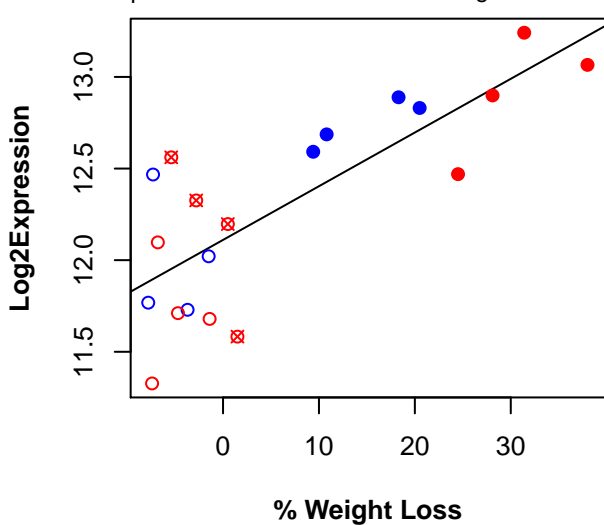

### Dpp7

p-value = 0.0005486

logFC = 0.029

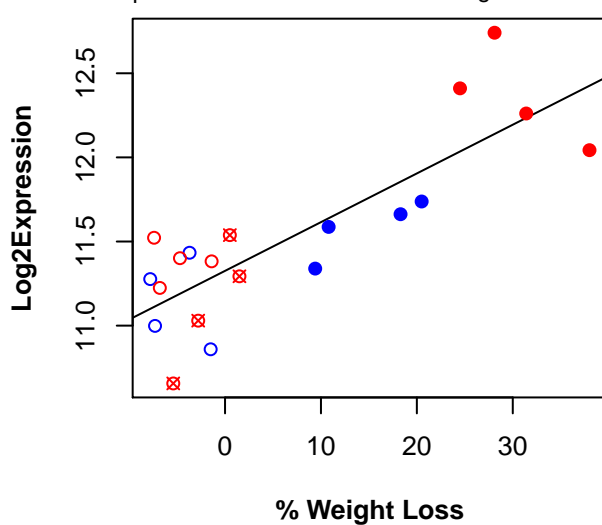



### Ets2

p-value = 0.00111114

logFC = 0.028

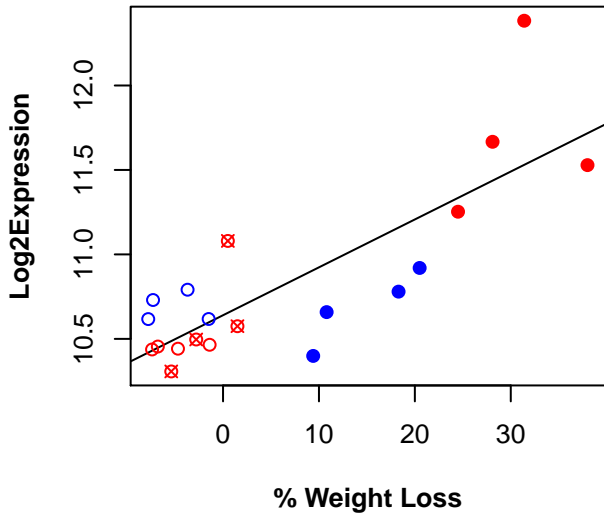

### Klhdc2

p-value = 0.00020983

logFC = 0.028

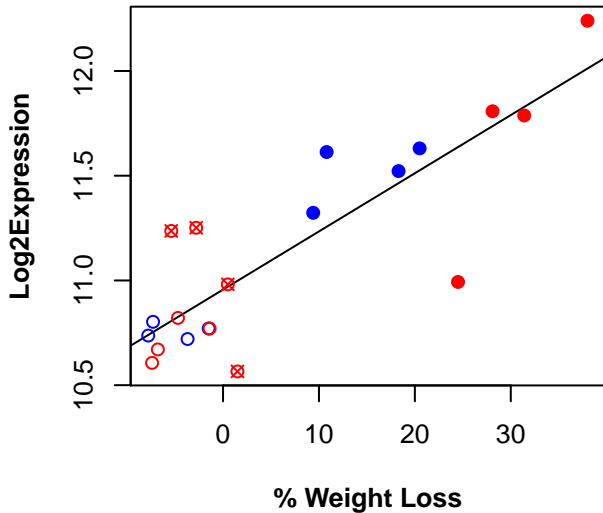

### Robo1

p-value = 0.00028569

logFC = -0.028

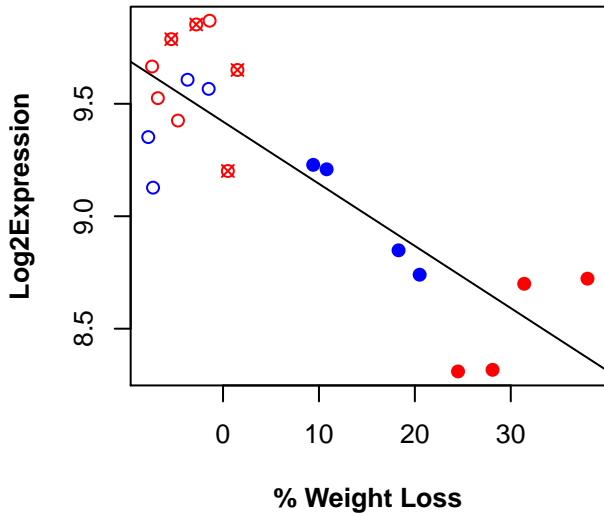

### Mmab

p-value = 2.96e-05

logFC = -0.028

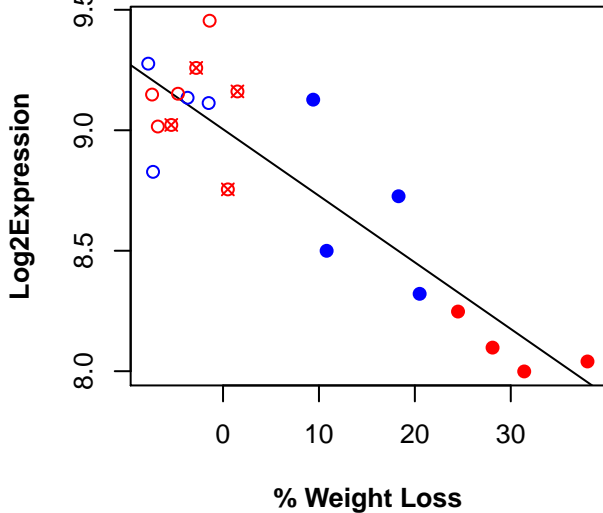



### 1500012F01Rik

p-value = 0.0005486

logFC = 0.027

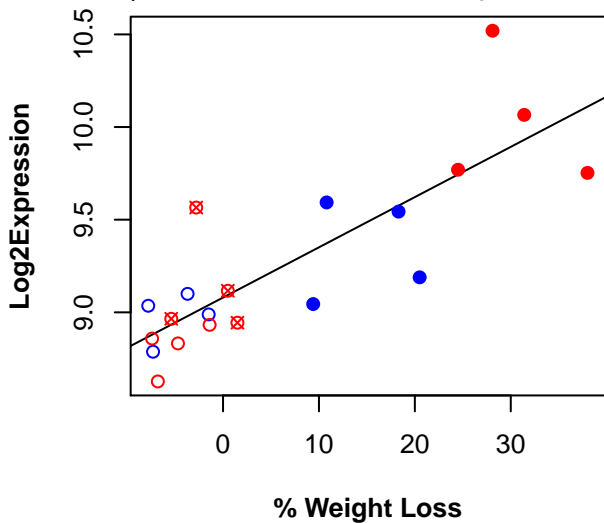

### Baat

p-value = 0.00146023

logFC = -0.027

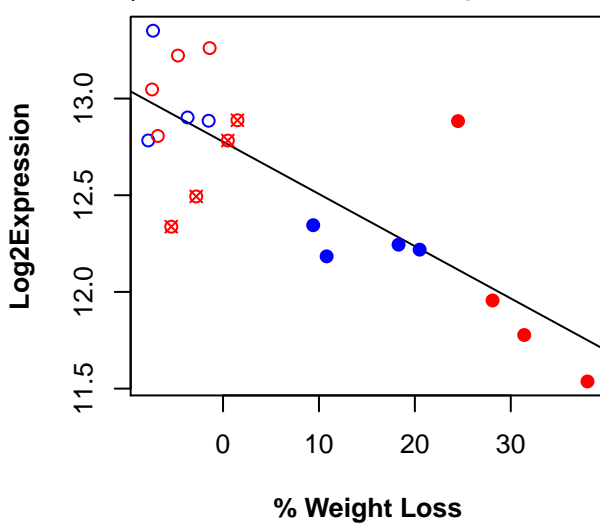

### Tcea3

p-value = 0.00044423

logFC = -0.027

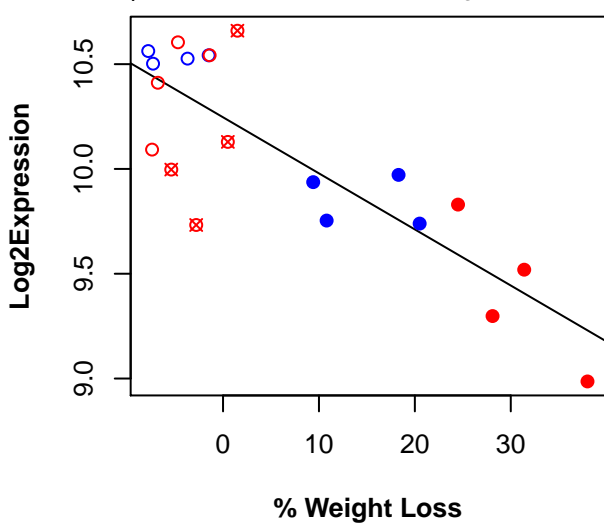

### Cyb5r3

p-value = 0.00013666

logFC = -0.026

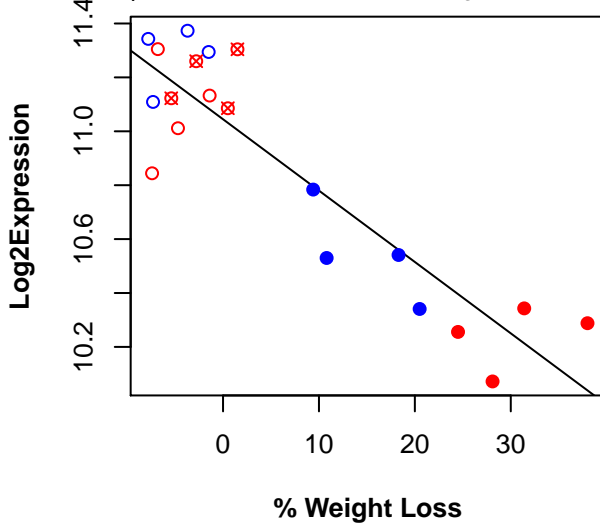



### Tpmt

p-value = 0.00063122 logFC = -0.026

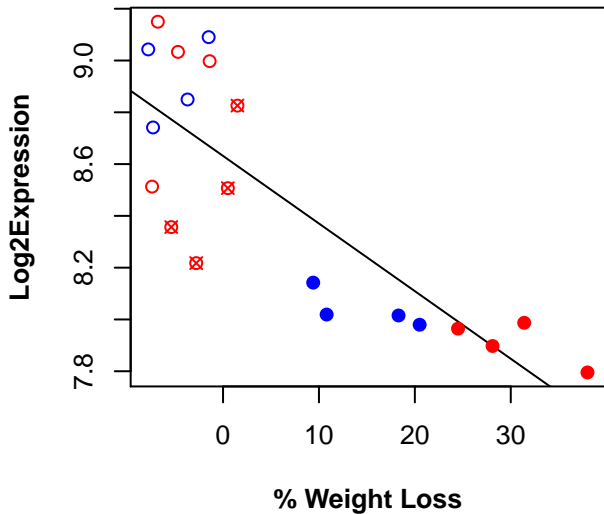

### Srd5a3

p-value = 0.00239549 logFC = 0.026

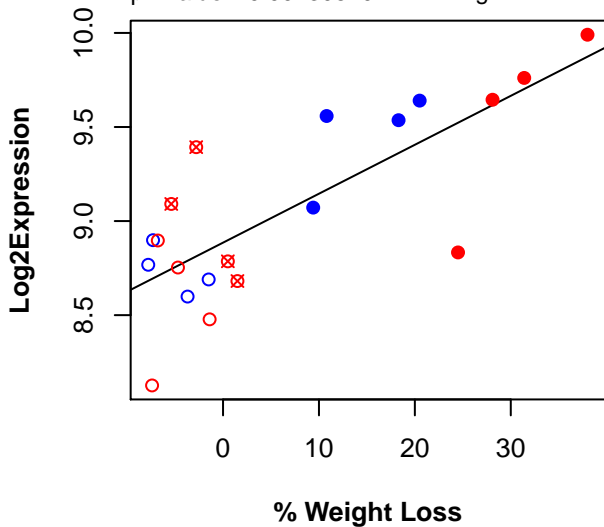

### D730039F16Rik

p-value = 0.00119153 logFC = -0.026

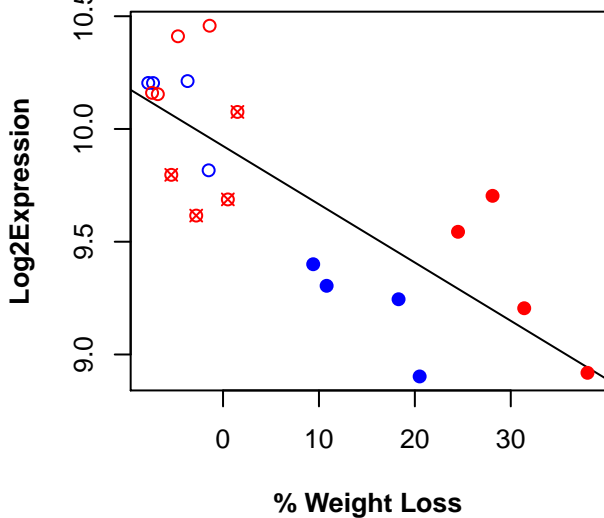

### Rpl13a

p-value = 0.00189688 logFC = 0.026

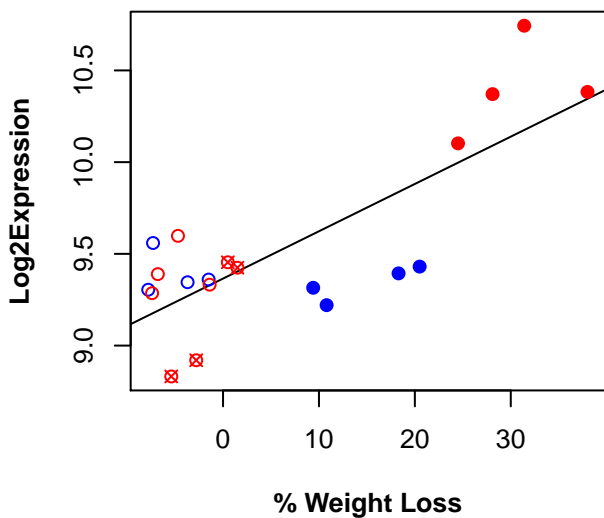

### Plscr2

p-value = 0.00088279 logFC = -0.026

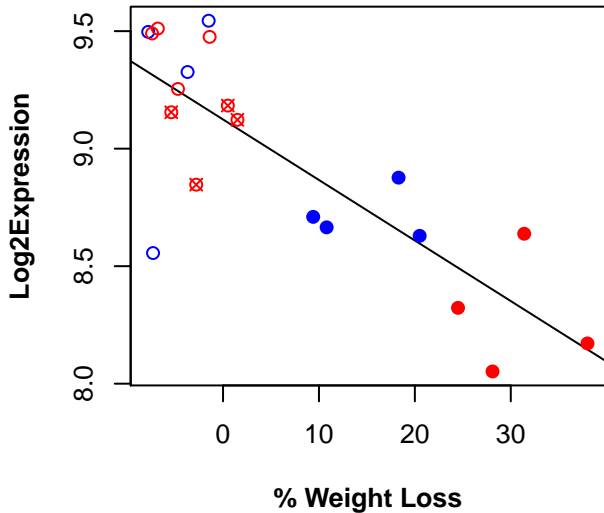

### Ndufs8

p-value = 0.00121674 logFC = -0.026

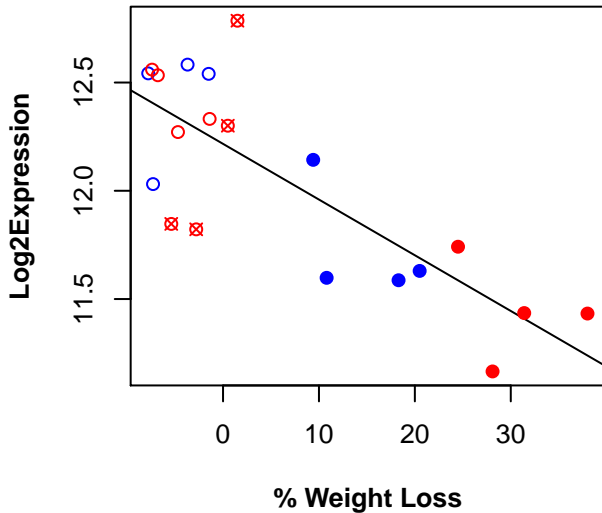

### 2210418O10Rik

p-value = 9.28e-05 logFC = -0.026

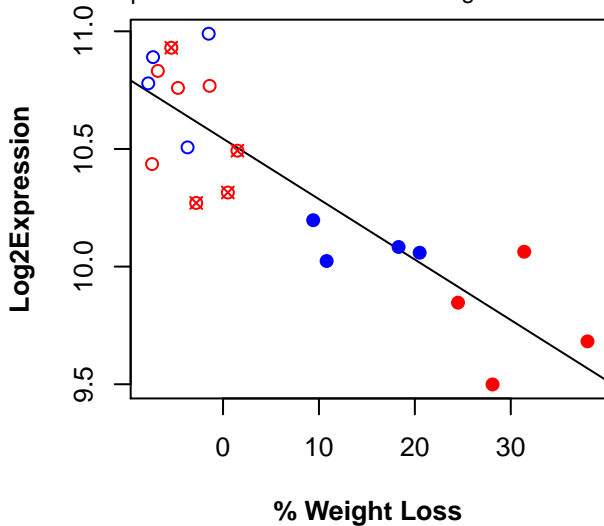

### C8g

p-value = 0.00048109 logFC = -0.026

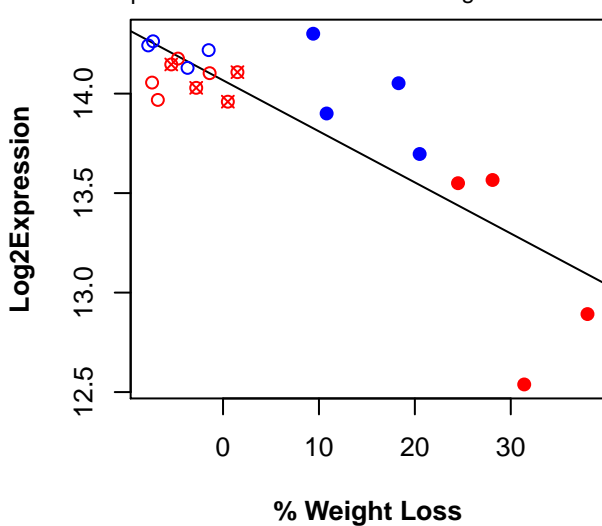





### Bloc1s1

p-value = 0.00189248 logFC = -0.025

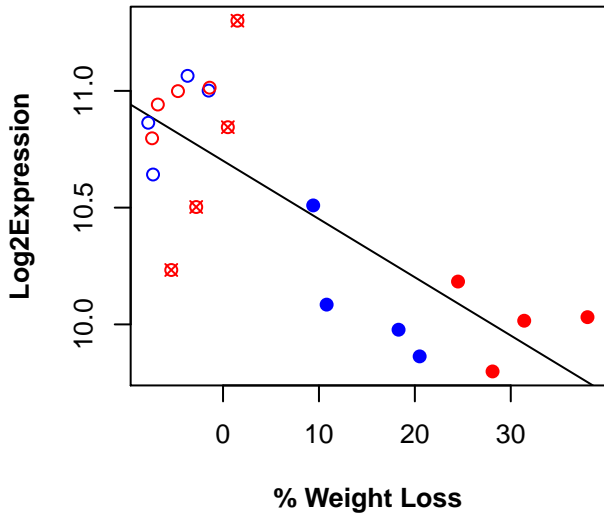

### Hmga1

p-value = 0.0003954 logFC = 0.025

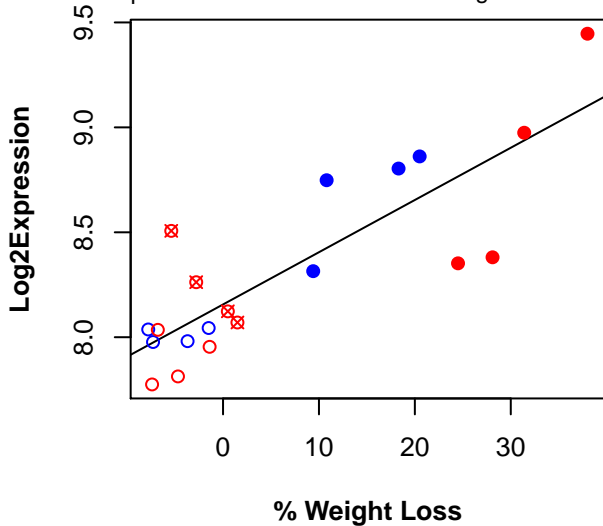

### 2810439F02Rik

p-value = 0.0012429 logFC = -0.025

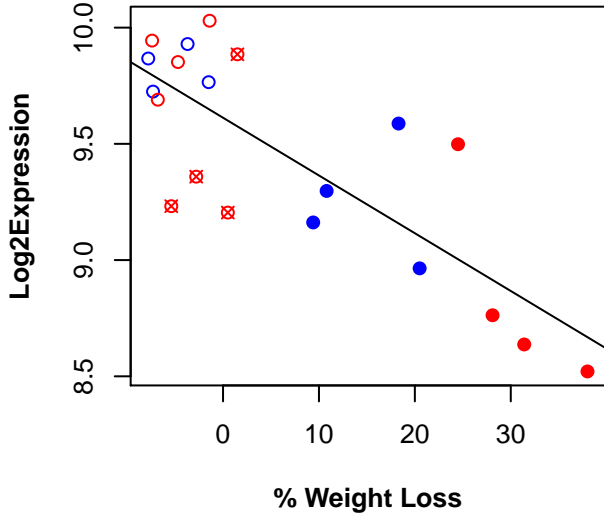

### Kik1b4

p-value = 0.00189688 logFC = -0.025

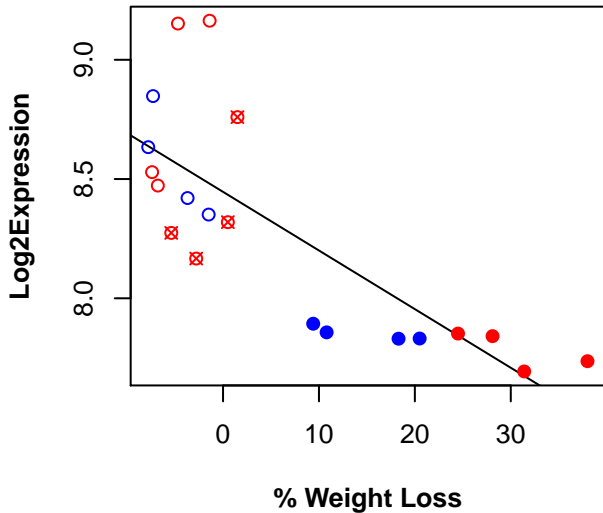





### Sfxn1

p-value = 1.606e-05

logFC = -0.023

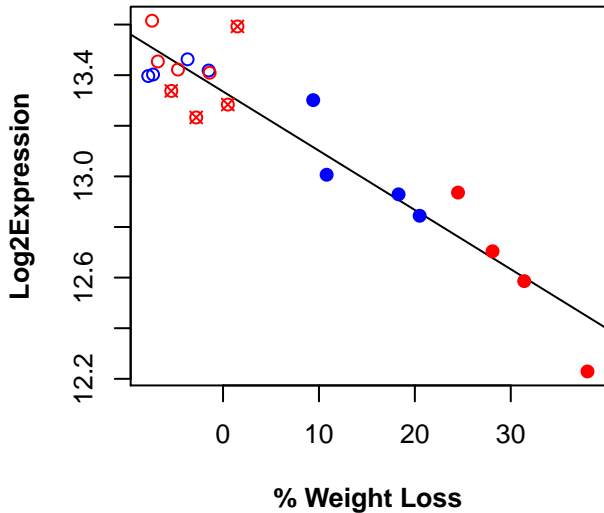

### 1110002B05Rik

p-value = 0.00113587

logFC = -0.023

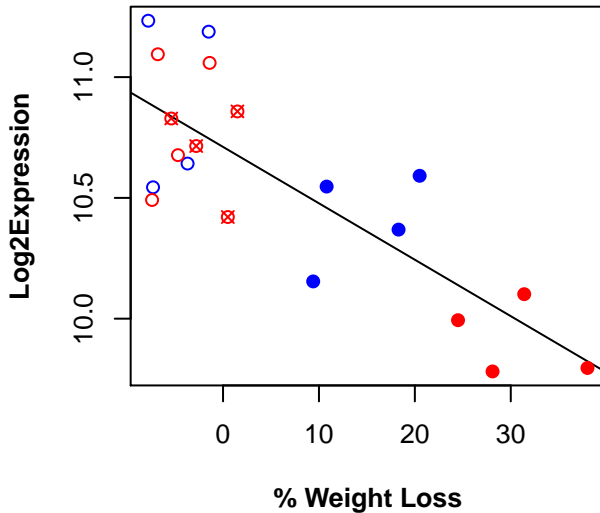

### Uhrf2

p-value = 3.95e-05

logFC = 0.023

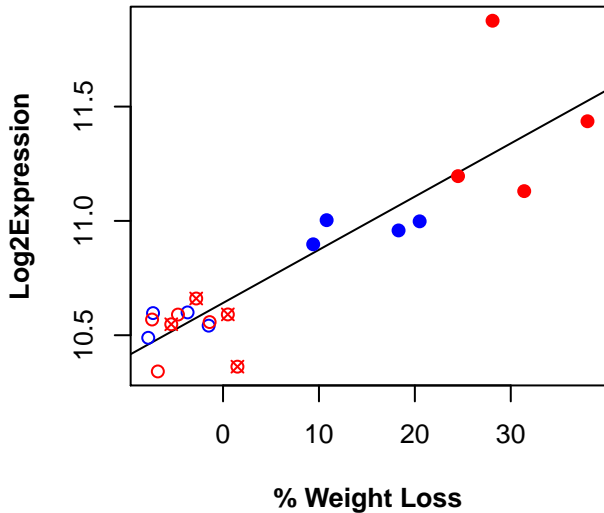

### Gcnt2

p-value = 0.00130217

logFC = 0.023

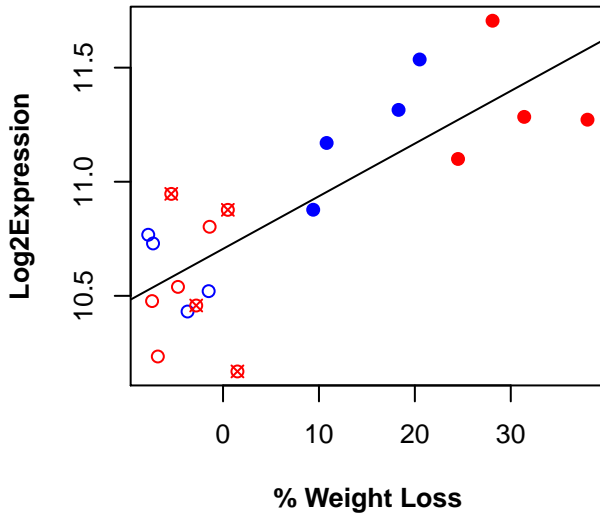

### Olfml1

p-value = 1.14e-05      logFC = -0.023

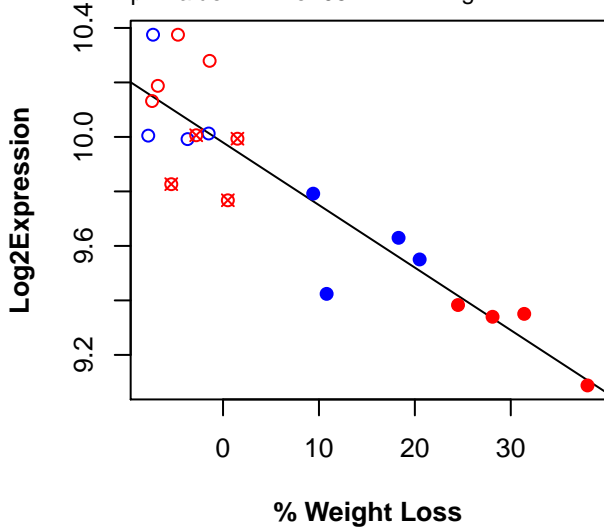

### Faah

p-value = 0.00059529      logFC = -0.023

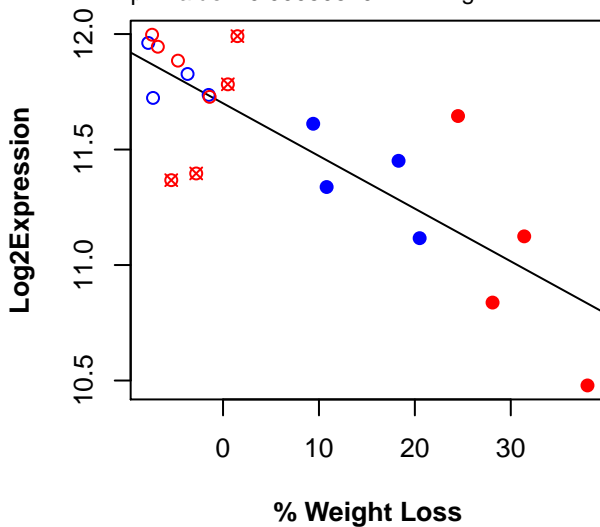

### Tmem55a

p-value = 0.0010518      logFC = 0.023

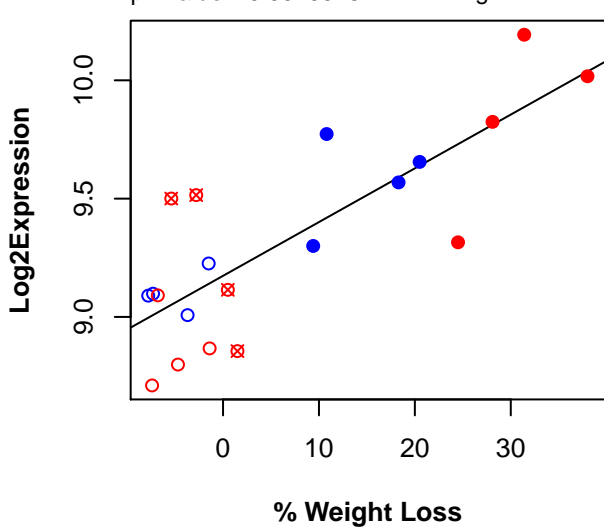

### Manba

p-value = 0.0003434      logFC = 0.023

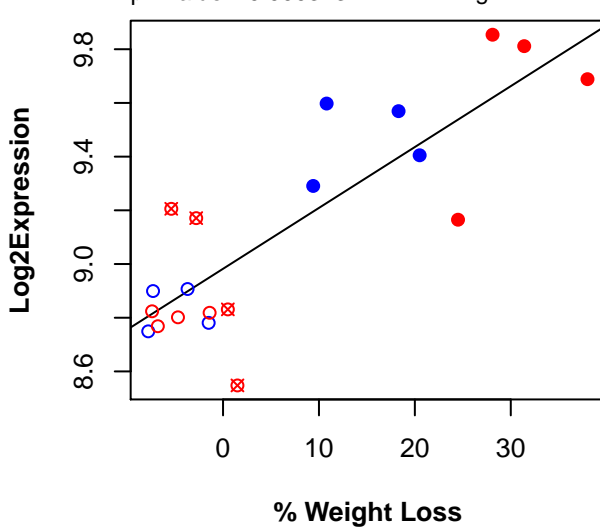

### Dbi

p-value = 0.00029249 logFC = -0.023

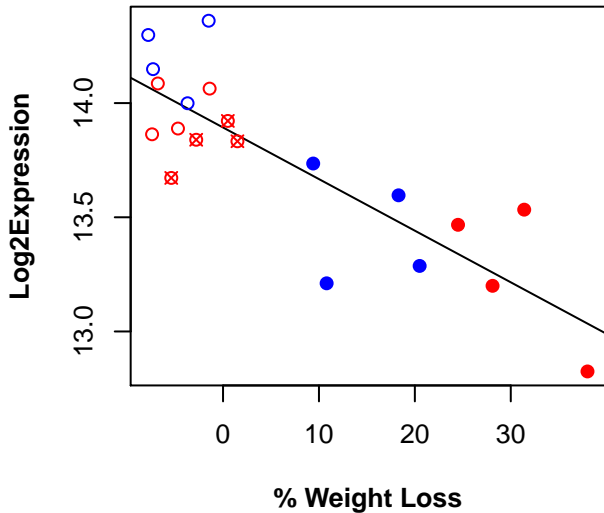

### Sap30

p-value = 0.00058951 logFC = 0.022

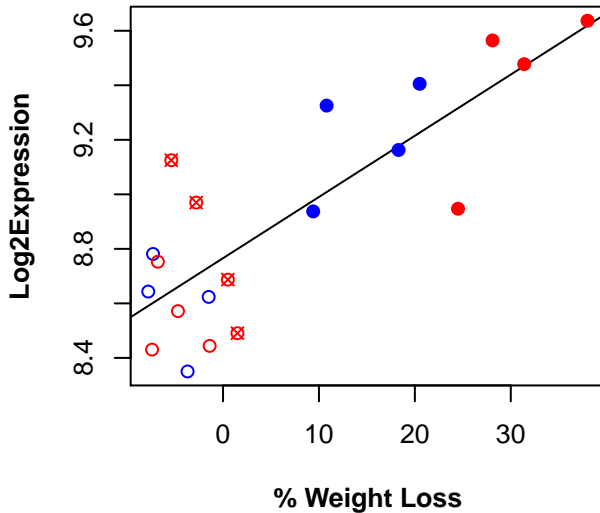

### Lman2l

p-value = 1.35e-05 logFC = 0.022

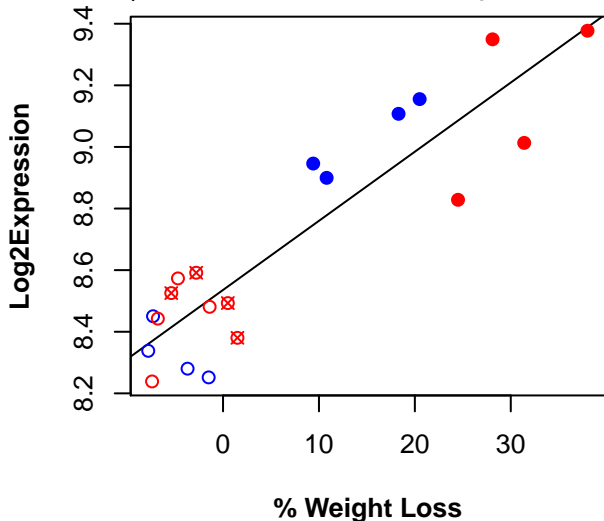

### AW555464

p-value = 3.55e-05 logFC = 0.022

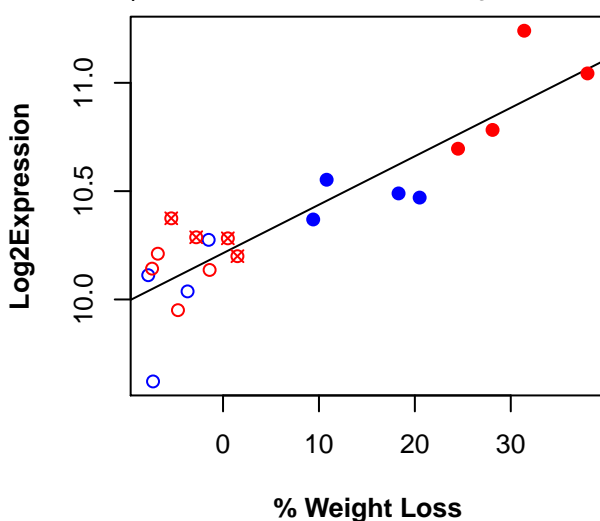

### Nckap11

p-value = 0.00021912

logFC = 0.022

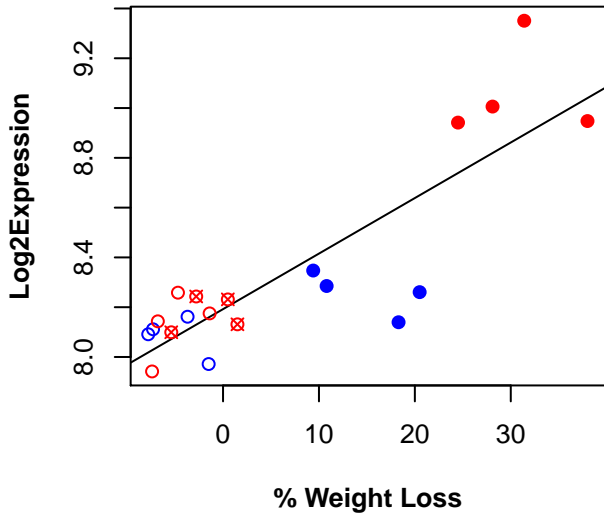

### Rps21

p-value = 0.00252547

logFC = 0.022

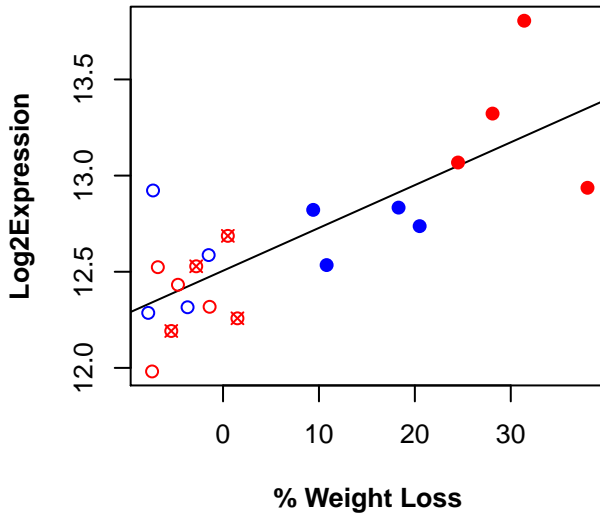

### Gna14

p-value = 0.00034435

logFC = -0.022

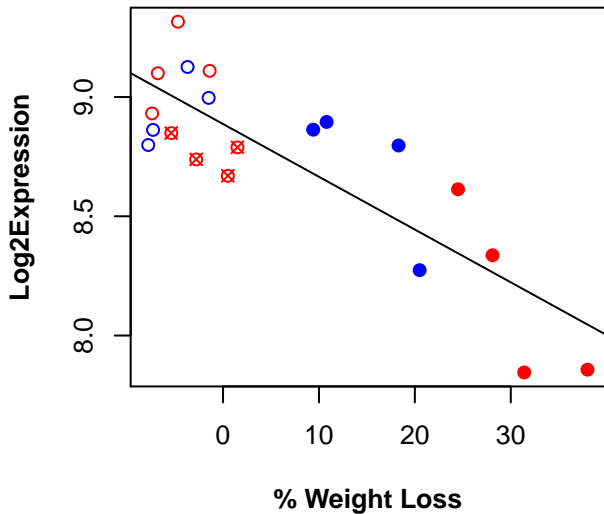

### Xbp1

p-value = 6.46e-05

logFC = 0.022

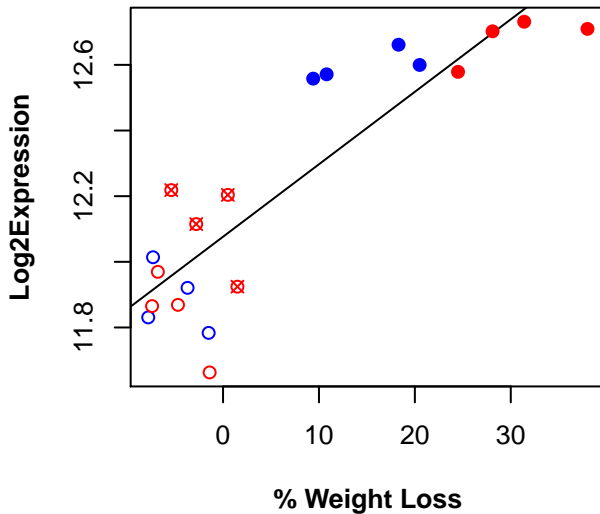



### Sat2

p-value = 3.19e-05      logFC = -0.022

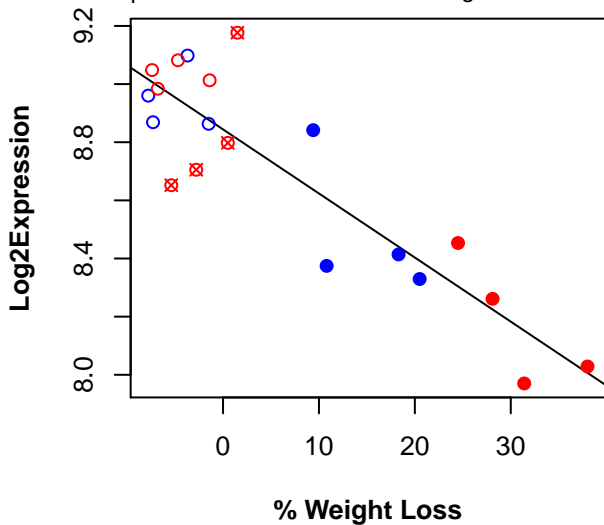









### Atg5

p-value = 0.00012523      logFC = -0.021

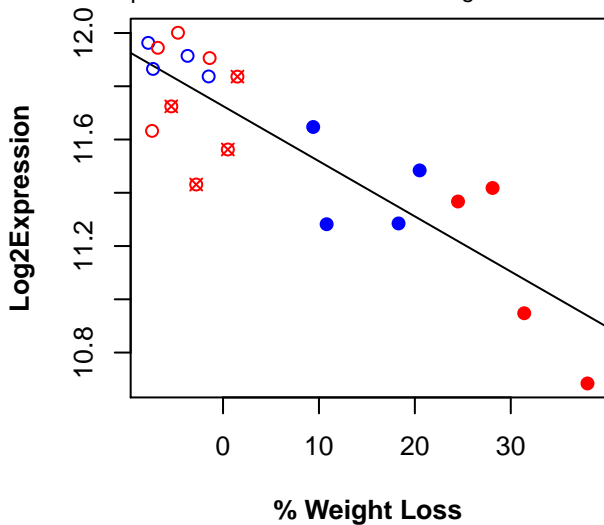

### Slc15a3

p-value = 5.78e-05      logFC = 0.021

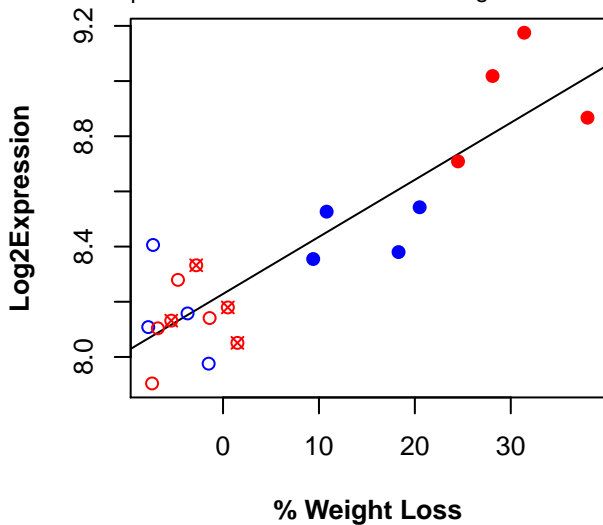

### Nedd9

p-value = 0.000645      logFC = 0.021

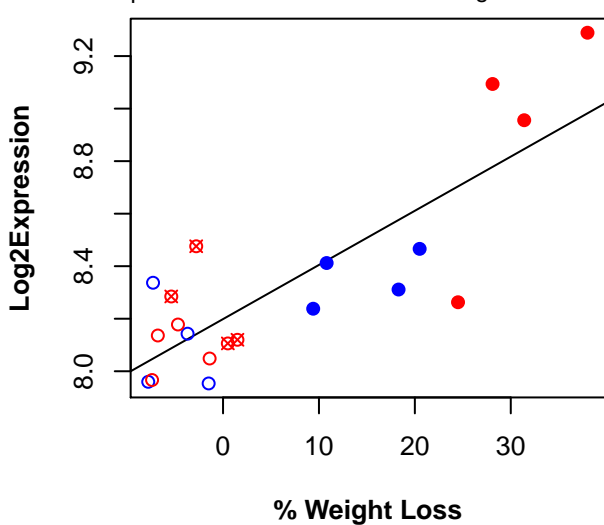

### Fbxo36

p-value = 0.00020558      logFC = -0.02

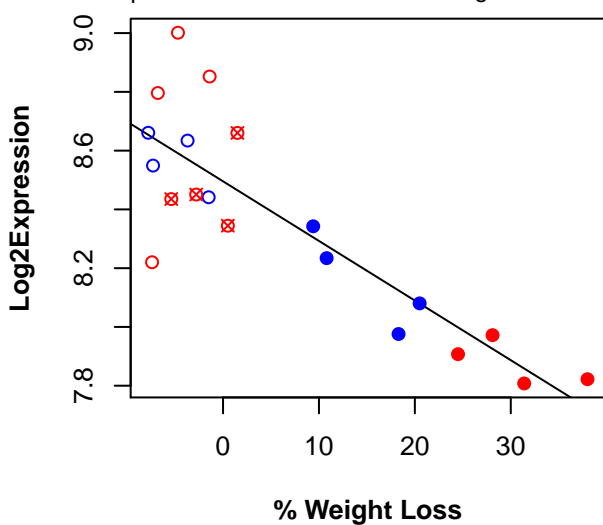

### Ccl4

p-value = 0.00058951

logFC = 0.02

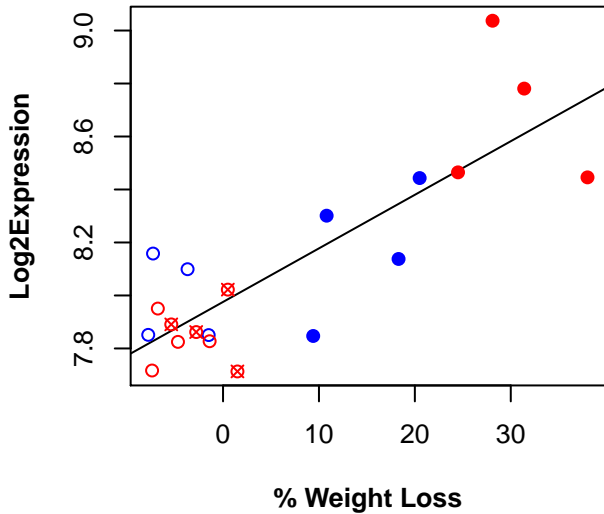

### Uqcr1

p-value = 0.0009025

logFC = -0.02

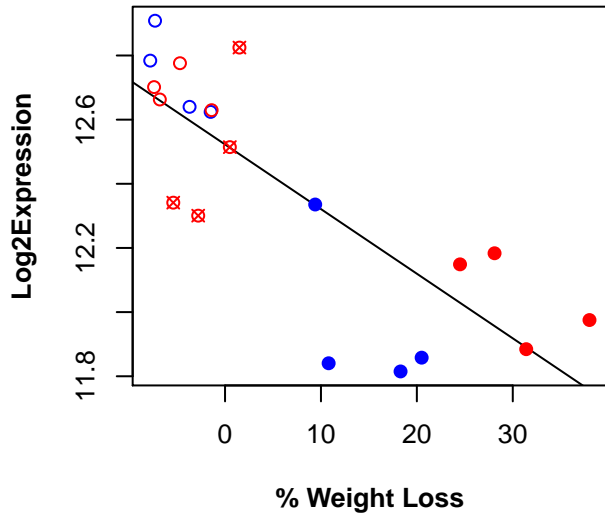

Supplement: pone.0012147.s001.pdf [file pone.0012147.s001.pdf]
