# Supplementary material for: Hepatic Gene Expression Profiling Reveals Key Pathways Involved in Leptin-Mediated Weight Loss in ob/ob Mice
Source: PubMed Central journal article supplement (PMC2922341; doi:10.1371/journal.pone.0012147), 2010-08-16

## **Gene Ontology Analyses - Supplemental Data**

Using the GOTree Machine web application, the 214 differentially expressed genes were categorized as being associated with specific biological processes, molecular functions and cellular compartments. Statistically significant over represented biological processes were determined using the hypergeometric test.

## Downregulated Cellular Compartments

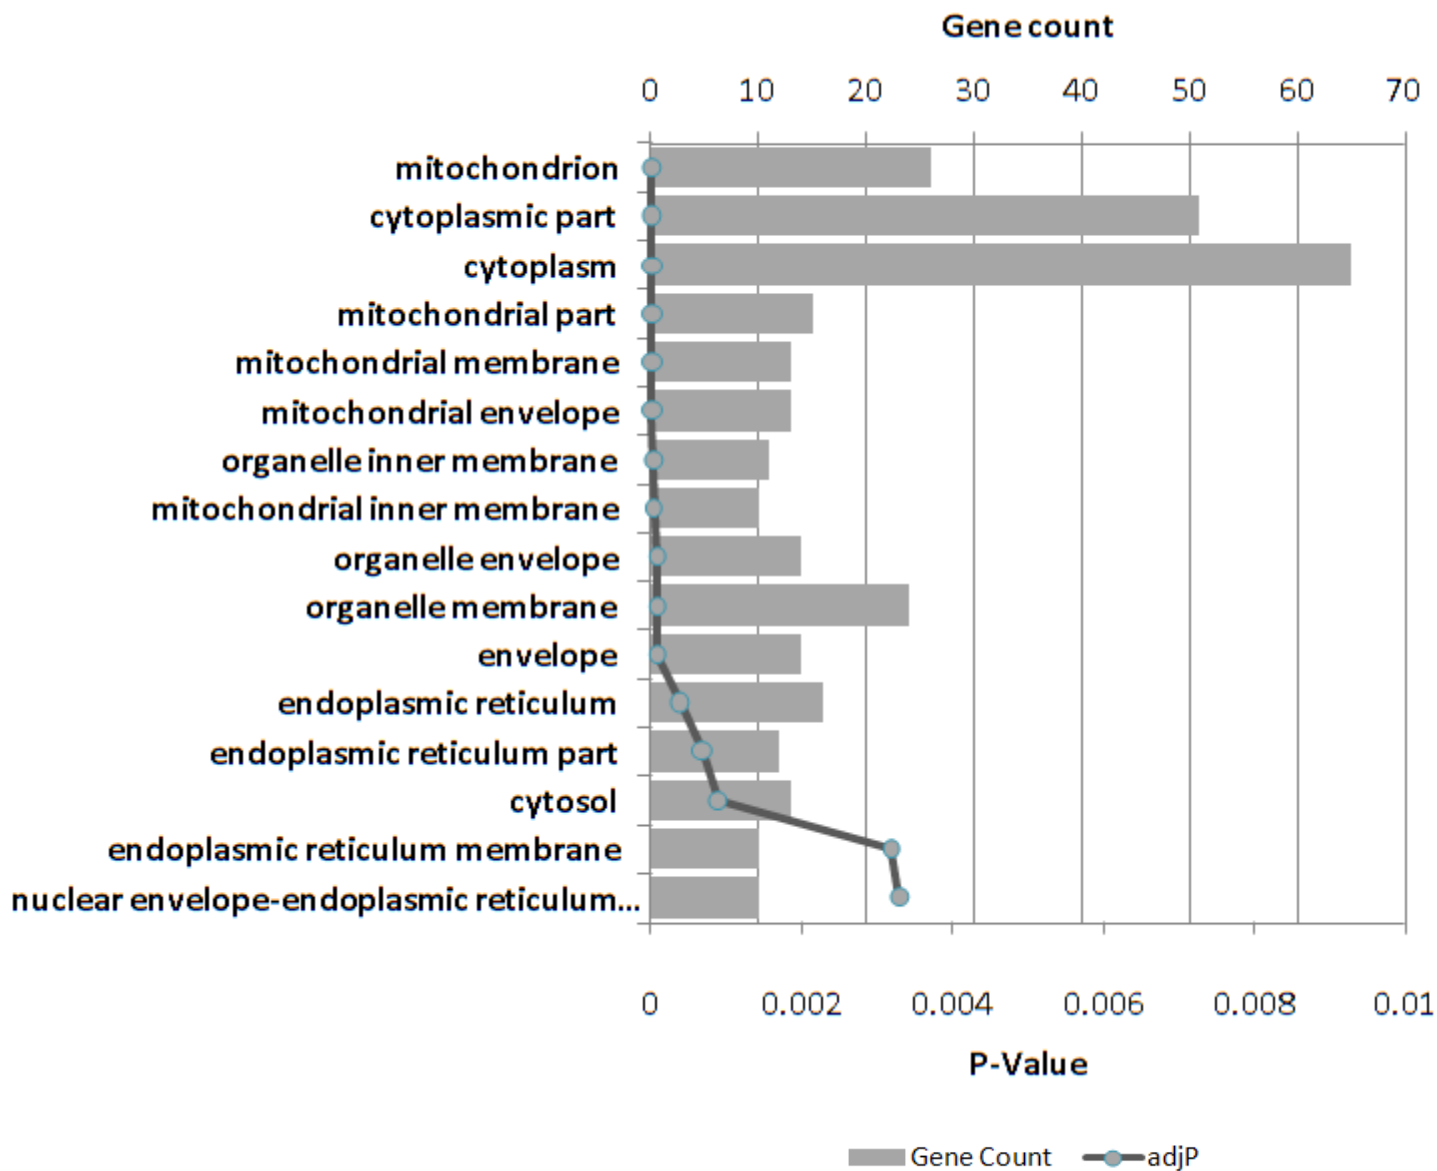

## Upregulated Cellular Compartments

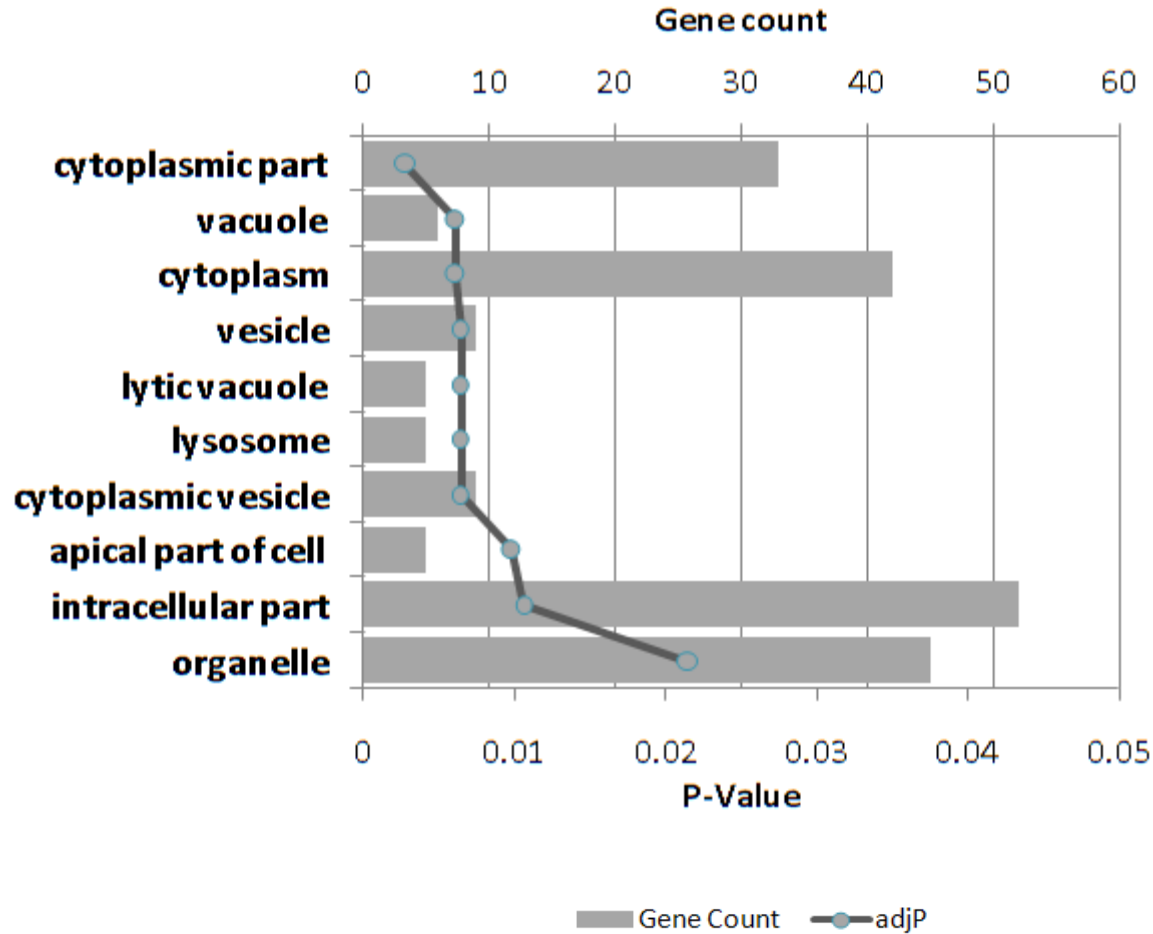

# Downregulated Biological Processes

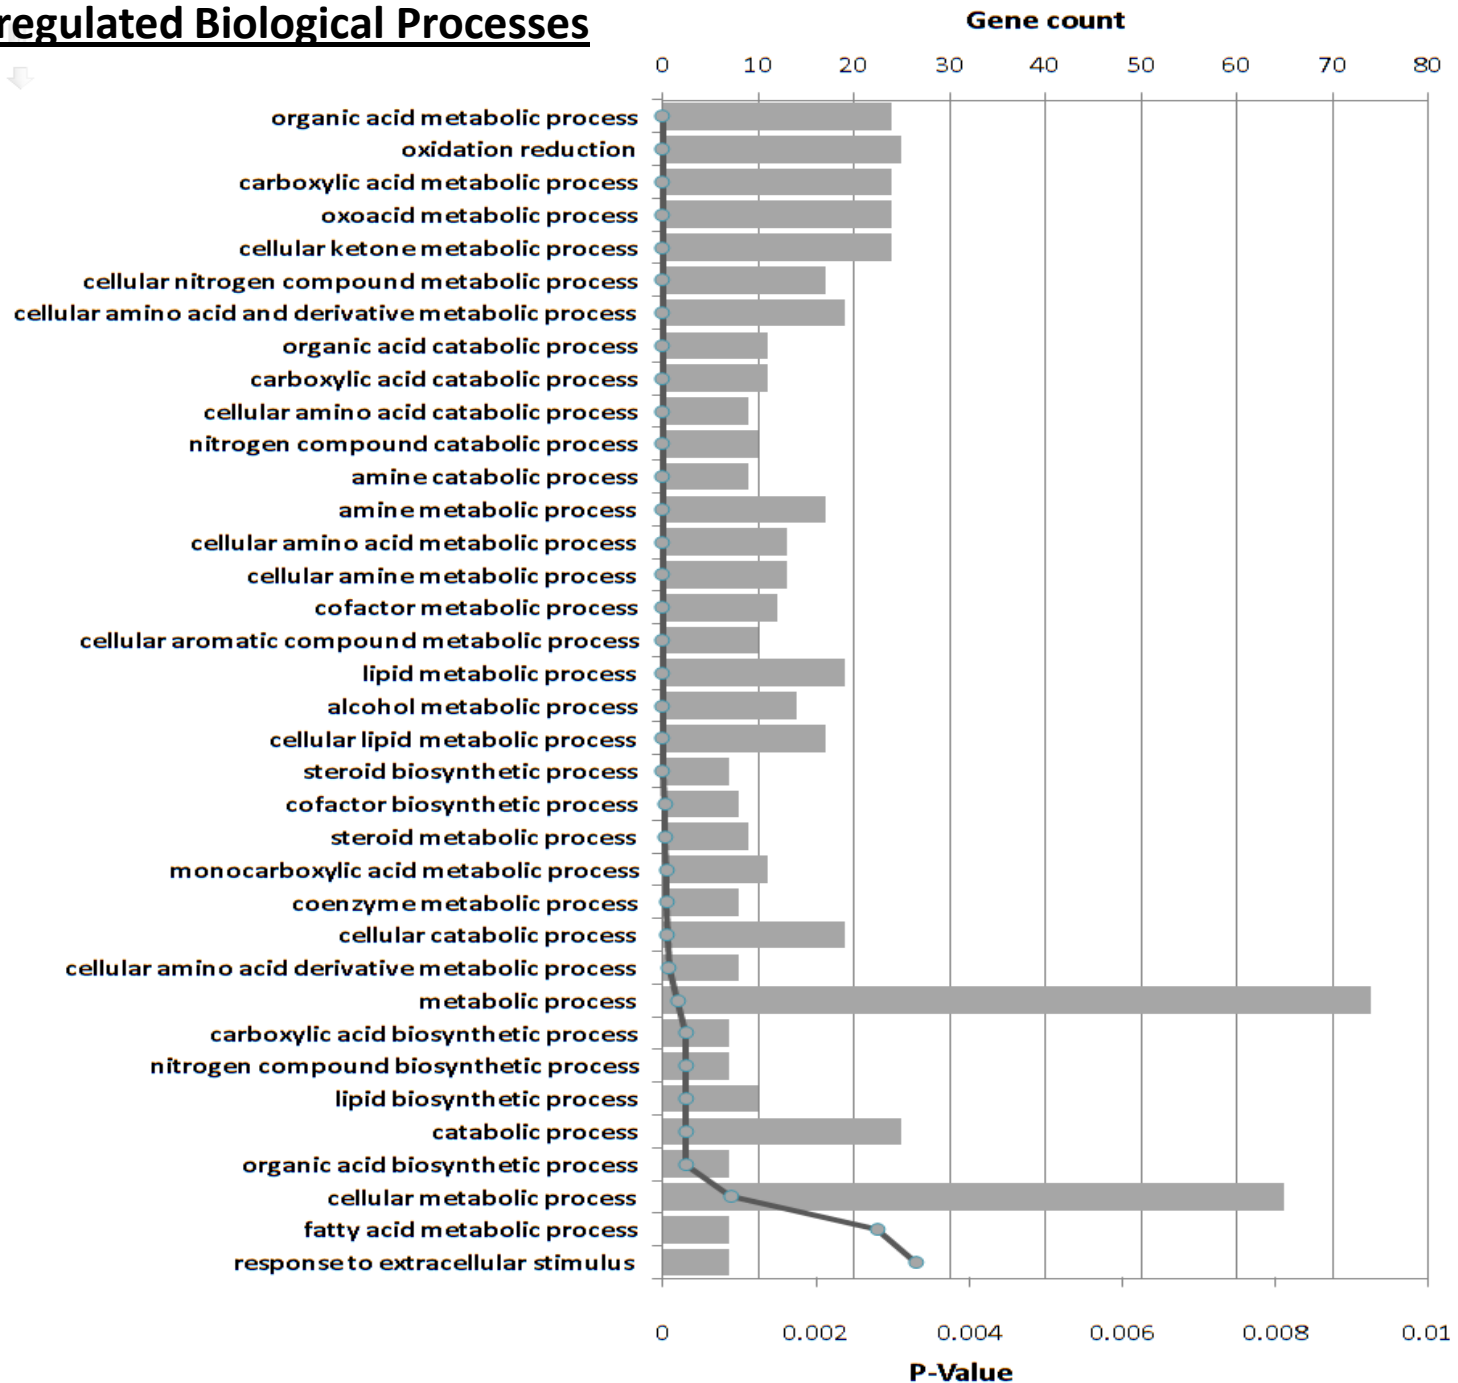

# Upregulated Biological Processes

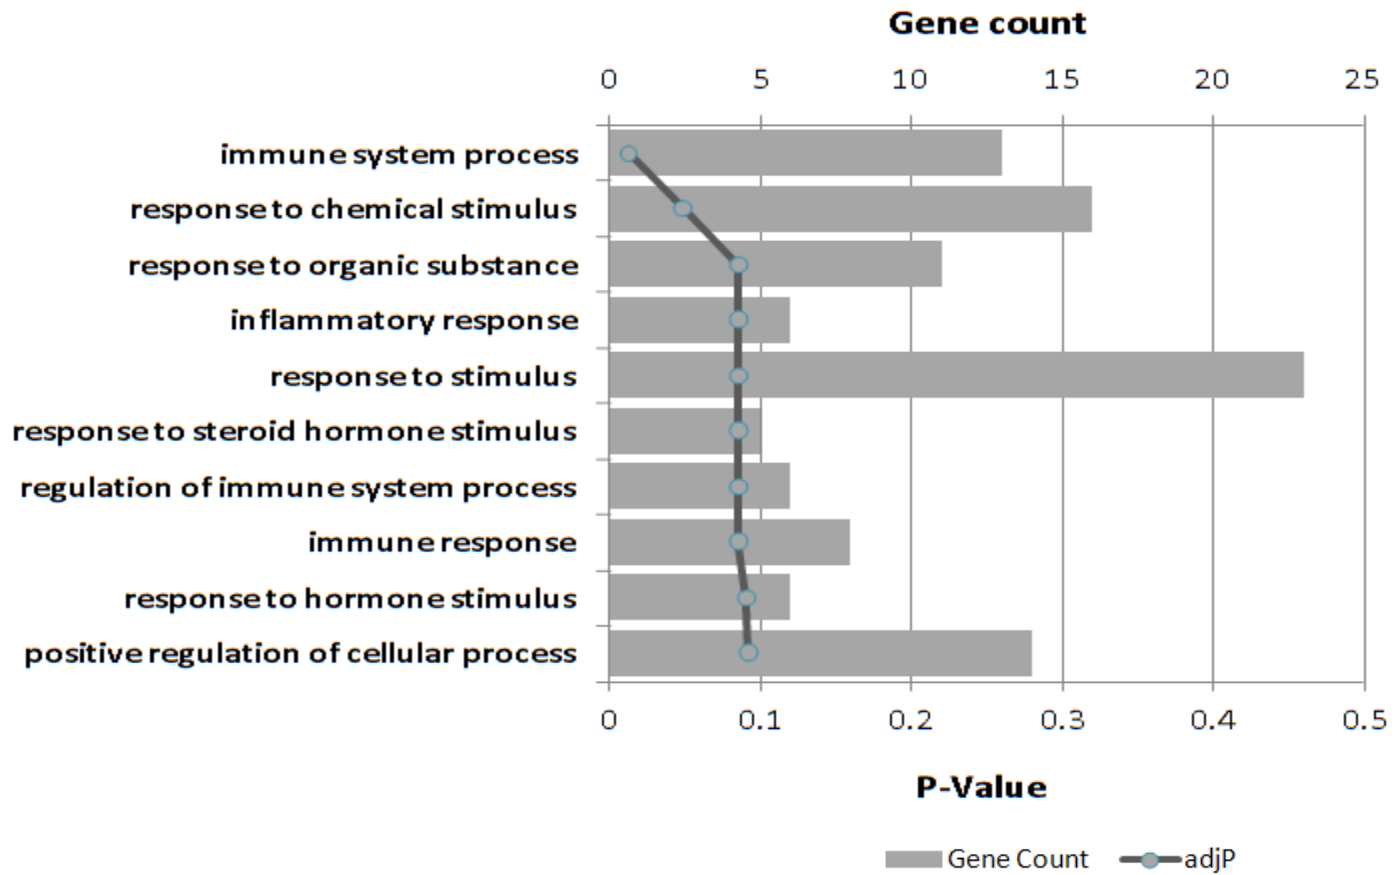

## Downregulated Molecular Functions

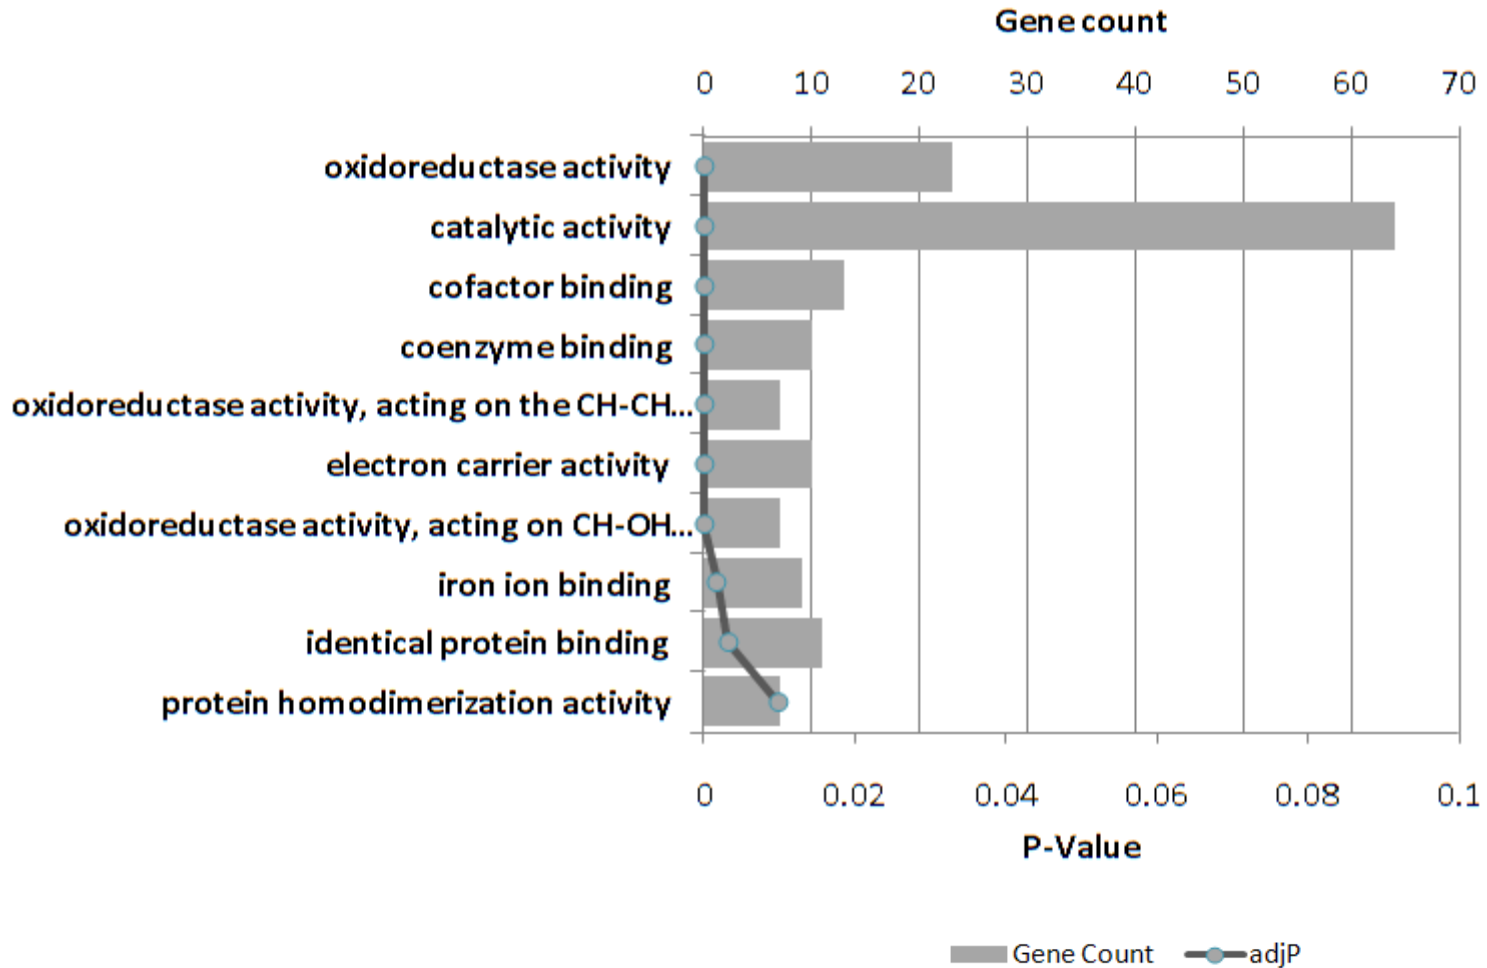

## Upregulated Molecular Functions

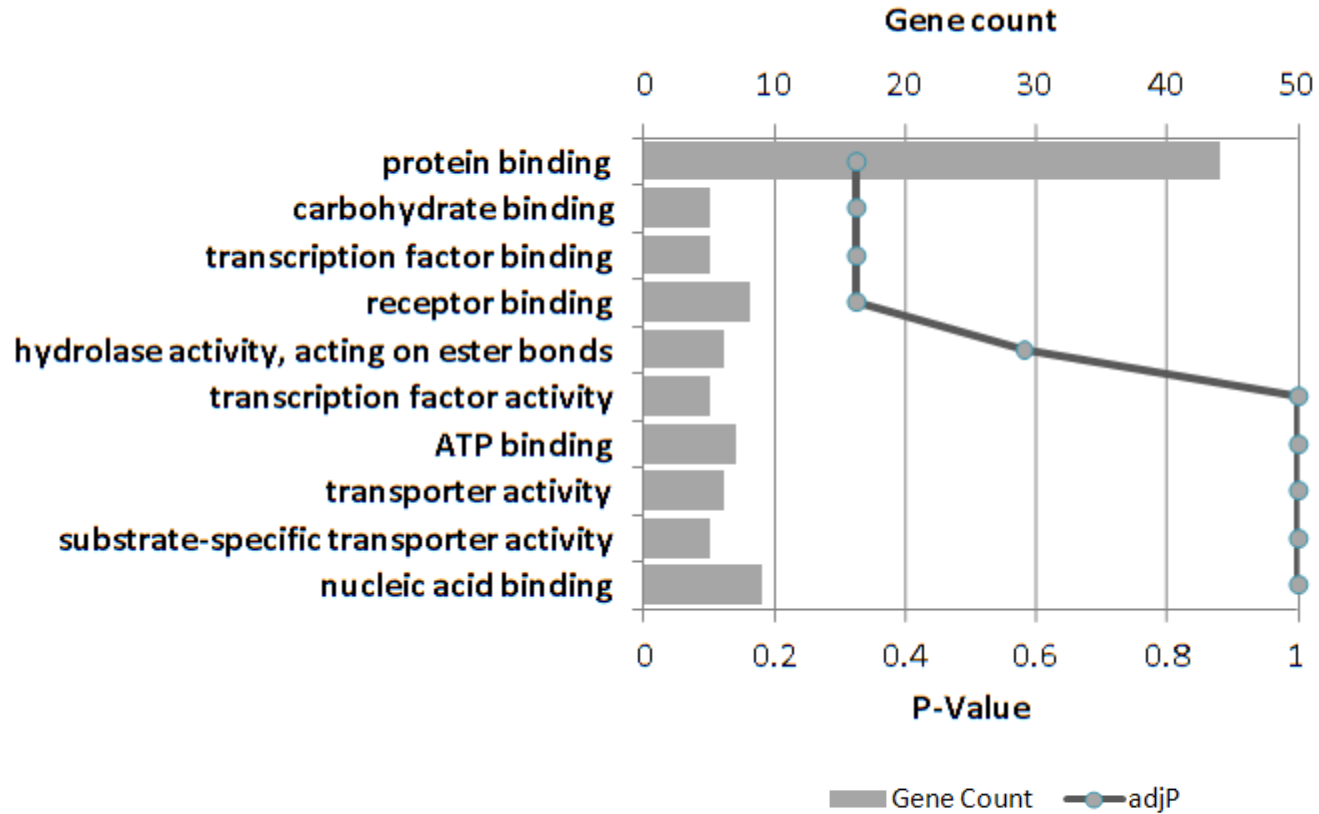

Supplement: pone.0012147.s003.pdf [file pone.0012147.s003.pdf]
