# Supplementary material for: Hepatic Gene Expression Profiling Reveals Key Pathways Involved in Leptin-Mediated Weight Loss in ob/ob Mice
Source: PubMed Central journal article supplement (PMC2922341; doi:10.1371/journal.pone.0012147), 2010-08-16
Supplement: pone.0012147.s004.pdf [file pone.0012147.s004.pdf]

#### S4: Top molecular networks and biological functions affected by leptin treatment.

| ID | Gene in the network                                                                                                                                                                                                                                                                                                                                                                                                                                                                                                                                                                                                                                                                                                                                                                                                                                                                                                                                                                                                                                                                                                                                                                                                                                                                                                                                                                                                                                                                                                                                                                                                                                                                                                                                                                                                                                                                                                                                 | Associated Network Functions                                                                   | Score | # genes |
|----|-----------------------------------------------------------------------------------------------------------------------------------------------------------------------------------------------------------------------------------------------------------------------------------------------------------------------------------------------------------------------------------------------------------------------------------------------------------------------------------------------------------------------------------------------------------------------------------------------------------------------------------------------------------------------------------------------------------------------------------------------------------------------------------------------------------------------------------------------------------------------------------------------------------------------------------------------------------------------------------------------------------------------------------------------------------------------------------------------------------------------------------------------------------------------------------------------------------------------------------------------------------------------------------------------------------------------------------------------------------------------------------------------------------------------------------------------------------------------------------------------------------------------------------------------------------------------------------------------------------------------------------------------------------------------------------------------------------------------------------------------------------------------------------------------------------------------------------------------------------------------------------------------------------------------------------------------------|------------------------------------------------------------------------------------------------|-------|---------|
| 1  | <p>26s Proteasome, <b>↓ACAT2</b>, <b>↑ACOT1</b> (includes EG:26897), Actin, <b>↓AES</b>, <b>↓AHCY</b>, Akt, Ap1, <b>↑AQP1</b>, <b>↓ARG1</b>, <b>↑ASS1</b>, <b>↓ATG5</b> (includes EG:9474), <b>↓BAAT</b>, BCR, Calmodulin, Calpain, Caspase, <b>↑CCL4</b>, <b>↑CD44</b>, Ck2, Collagen type I, Collagen type IV, Creb, <b>↑CTNNB1</b>, <b>↓CYB5R3</b>, <b>↑CYBA</b>, <b>↑CYP17A1</b>, <b>↓CYP2C29</b>, Cytochrome c, <b>↓DBI</b>, <b>↑DUSP6</b>, <b>↑EDNRB</b>, <b>↑EGFR</b>, <b>↑EPS8L2</b>, ERK, ERK1/2, <b>↓ES22</b>, <b>↑ETS2</b>, <b>↓FAAH</b>, <b>↑FCER1G</b>, Fibrinogen, FOXS1, FSH, <b>↓GAS2</b>, <b>↓GCK</b>, <b>↑GCNT2</b>, glutathione transferase, <b>↓GPT</b>, Growth hormone, GST, <b>↓GSTA3</b>, <b>↓GSTA5*</b>, <b>↓GSTT1</b>, <b>↓GSTT3</b>, <b>↓HAMP</b>, hCG, Histone h3, <b>↑HLA-DQB1</b>, <b>↑HMGAI1</b>, <b>↓HMGCS1</b>, <b>↑HPX</b>, <b>↓HSD17B10</b>, <b>↓HSD3B1</b>, Hsp90, <b>↑HSP90AB1</b>, <b>↑HSP90B1</b>, IFN Beta, <b>↑IGFBP2</b>, IgG, IL1, IL12 (complex), Immunoglobulin, Insulin, Interferon alpha, Jnk, <b>↓KLK2</b>, <b>↓KYNU</b>, LDL, Lh, <b>↑LMO2</b>, <b>↑LPL</b>, <b>↑LYZ</b>, <b>↑MAGED1</b>, Mapk, <b>↑MAT2A</b>, Mek, Mmp, <b>↑MMP12</b>, <b>↑MRPS6</b> (includes EG:64968), <b>↓MVD</b>, N-cor, <b>↓NDUFA3</b>, <b>↑NEDD9</b>, NFkB (complex), <b>↑NUPR1</b>, P38 MAPK, palmitoyl-CoA hydrolase, <b>↓PCSK9</b>, Pdgf, PDGF BB, peptidase, PI3-kinase, PI3K, Pka, Pkc(s), PLA2, <b>↑PLA2G12A</b>, <b>↓PLA2G4F</b>, <b>↓PLS3</b>, <b>↑PLSCR1</b>, <b>↓PPP1R1B</b>, <b>↓PSEN2</b>, <b>↑RAB8B</b>, Ras homolog, <b>↓RILP</b>, <b>↑RPS11</b>, Rxr, <b>↑SAP30</b>, <b>↓SCD</b>, SENP5 (includes EG:205564), <b>↑SERPINB6</b>, <b>↓SERPINC1</b>, Shc, <b>↓SLC25A1</b>, <b>↓SLC29A1</b>, <b>↑SLC40A1</b>, <b>↑SOCS2</b>, STAT5a/b, Tgf beta, <b>↑TGFB1</b>, <b>↓THRSP</b>, <b>↑TMEM55A</b>, <b>↓TPMT</b>, <b>↓TSC22D3</b>, <b>↑UNG</b>, <b>↓UQCRC1</b>, <b>↑USP18</b>, Vegf, <b>↑XBP1</b>, <b>↓ZFP36</b></p> | Lipid Metabolism,<br>Small Molecule Biochemistry,<br>Cell-To-Cell Signaling and<br>Interaction | 145   | 84      |
| 2  | <p><b>↓9130409I23RIK</b>, <b>↓AASS</b>, <b>↓ABAT</b>, <b>↓ACSS2</b>, AFP, <b>↑AGPAT9</b>, AHR, ALDH16A1, ALDH3A2, ALDH5A1, <b>↓ALDH6A1</b>, AMD1, aminomethyltransferase, <b>↓ANKRD40</b>, APL1B, ARF4, <b>↓ARG1</b>, BAMBI, beta-estradiol, <b>↑C1QB</b>, CCBP2, <b>↑CCT4</b>, CDH13, CDH15, CELSR2, CGB, cholesterol, <b>↓CISD1</b>, CMA1, CNN2, COL16A1, CRK, <b>↓CSTF3</b>, CTSD, CYB5B, CYP27A1, DHRS1, dimethylglycine dehydrogenase, <b>↓DMGDH</b>, <b>↓DPYD</b>, <b>↑DUSP6</b>, ECM1, EIF4E, EIF4EBP1, ENPP1, ethanol, FASTK, FCAR, FGB, FZD7, <b>↓GAMT</b>, GCC2, <b>↓GCDH</b>, <b>↑GDF10</b>, <b>↓GLS2</b>, <b>↑GNA14</b>, <b>↑GPNMB</b>, <b>↓GSTT1</b>, <b>↓HAMP</b>, <b>↓HAO2</b>, HGF, HPGD, HRAS, HSD17B7, IL5, IL6, IL13RA2, IL17F, INSIG2, KDELR3, KIAA0182, <b>↑KLHDC2</b>, L-glutamic acid, <b>↑LEPROT</b>, LIF, LIMA1, LIMS1, LRRRC8C, <b>↓LSS</b>, MICAL1, MOGS, <b>↓MPV17L</b>, MSR1, <b>↓MVD</b>, MYC, NME3, <b>↓NNMT</b>, NOVA1, NOX3, <b>↑NUPR1</b>, oxidoreductase, PARP, <b>↑PARP14</b>, <b>↓PARVA</b>, PDLIM4, <b>↓PLS3</b>, PRL, <b>↓PRODH</b>, PTEN, <b>↑RAB8B</b>, <b>↑RBPMS</b>, <b>↓RCAN2</b>, <b>↓RDH16</b>, REG3G, <b>↓RNF103</b>, <b>↓ROBO1</b>, <b>↑RPL13A</b>, <b>↑RPL27A</b>, <b>↑RPS19</b>, <b>↑RPS21</b>, <b>↓SARDH</b>, <b>↑SEL1L3</b>, <b>↓SELENBP1</b>, SEMA3C, <b>↑SERPINA7</b>, <b>↓SFXN1</b>, <b>↓SIGMAR1</b>, SLC12A6, <b>↓SLC25A1</b>, SLC2A4, <b>↓SLC6A12</b>, <b>↓SNHG11</b> (includes EG:319317), <b>↑SNX10</b>, SOX4, SPCS2, SSBP2, STAT3, <b>↓TECR</b>, TGFB1, TLR4, <b>↑TMEM184B</b>, <b>↑TMSB4X</b>, TNF, <b>↑TTC3</b>, TWIST2, TXN2, <b>↓UPP2</b>, VCL, VIM, WISP1</p>                                                                                                                                                                                                                                                                                                                      | Lipid Metabolism,<br>Small Molecule Biochemistry,<br>Cell Cycle                                | 93    | 60      |
| 3  | <p><b>↓ABCA6</b>, <b>↓ACAT2</b>, ACTR3, AIP, ALDH16A1, AMD1, ANAPC10, APOA4, ARL4C, ATP, <b>↓BHMT</b>, <b>↓BLOC1S1</b>, C10ORF10, <b>↓C14ORF147</b>, <b>↓C8G</b>, CABCL1, CCDC59, CD244, CDC23 (includes EG:8697), CDH13, CELSR1, <b>↑CHAC1</b>, <b>↓CHI3L1</b>, <b>↓CLCN2</b>, CLTCL1, Coup-Tf, <b>↓CPPED1</b>, CTSD, CYB5A, CYP27A1, Cytochrome p450, DAD1, <b>↑DBNDD2</b>, <b>↓DCXR</b>, <b>↑DPP7</b>, EEF1D, enoyl-CoA hydratase, Eotaxin, <b>↓FAHD2A</b>, <b>↓FAM158A</b>, <b>↓FAM73B</b>, FGB, FOS, GAD1, <b>↑GARS</b>, GAS7, GBP1 (includes EG:2633), glutamine, GRIK2, <b>↓HAAO</b>, HADHA, <b>↑HADHB</b>, HNF4A, <b>↓HPD</b>, HTT, hydrolase, IFITM1, IFNA2, IFNG, IL11RA, KDM5A, leukotriene C4, <b>↑LMAN2L</b>, LOC100129193, MDH1, <b>↓MFSD2A</b>, MIR181A1, MIR205 (includes EG:406988), MIRN324, <b>↑MMP12</b>, MSR1, MT1L, <b>↑NCEH1</b>, <b>↑NCKAP1L</b>, ND3, ND4L, <b>↓NDUFA3</b>, NDUFA9 (includes EG:4704), NDUFS1, NDUFS3, NDUFS4, NDUFS5, <b>↓NDUFS8</b>, NDUFS6 (includes EG:4726), NDUFV2, <b>↓NIPSNAP1</b>, <b>↓NNMT</b>, NPTX1, NR3C1, <b>↓OLIG1</b>, <b>↓OTC</b>, PARP9, PCSK1, PCSK6, PDE4B, PIK3CD, PLAGL1, <b>↓PLSCR2</b>, PNPT1, PPARGC1B, <b>↑PRCP</b>, PSMA5, <b>↓RAET1B</b>, REXO2, <b>↑RPL31</b>, <b>↓SAT2</b>, <b>↓SDS</b>, SEC11A, SHH, <b>↑SLC15A3</b>, <b>↓SLC22A18</b>, <b>↓SLC29A1</b>, <b>↓SLC38A4</b>, <b>↓SLC44A1</b>, <b>↓SLCO2B1</b>, SP2, SPCS3, SRP54, SUPT7L, TADA1, TBC1D17, <b>↓TCEA3</b>, TCF7, THRB, TICAM2, <b>↓TIMD2</b>, TLR1, TMEM158, <b>↑TMEM208</b>, TNFAIP6, TNFRSF8, TNFSF9, TNFSF14, TRAF6, TTC35, TTRAP, <b>↑UHRF2</b>, ULBP2, <b>↑USP18</b>, <b>↑WBPS</b></p>                                                                                                                                                                                                                                                                                                                      | Cell Morphology,<br>Cellular Compromise,<br>Genetic Disorder                                   | 71    | 49      |



# Network-3

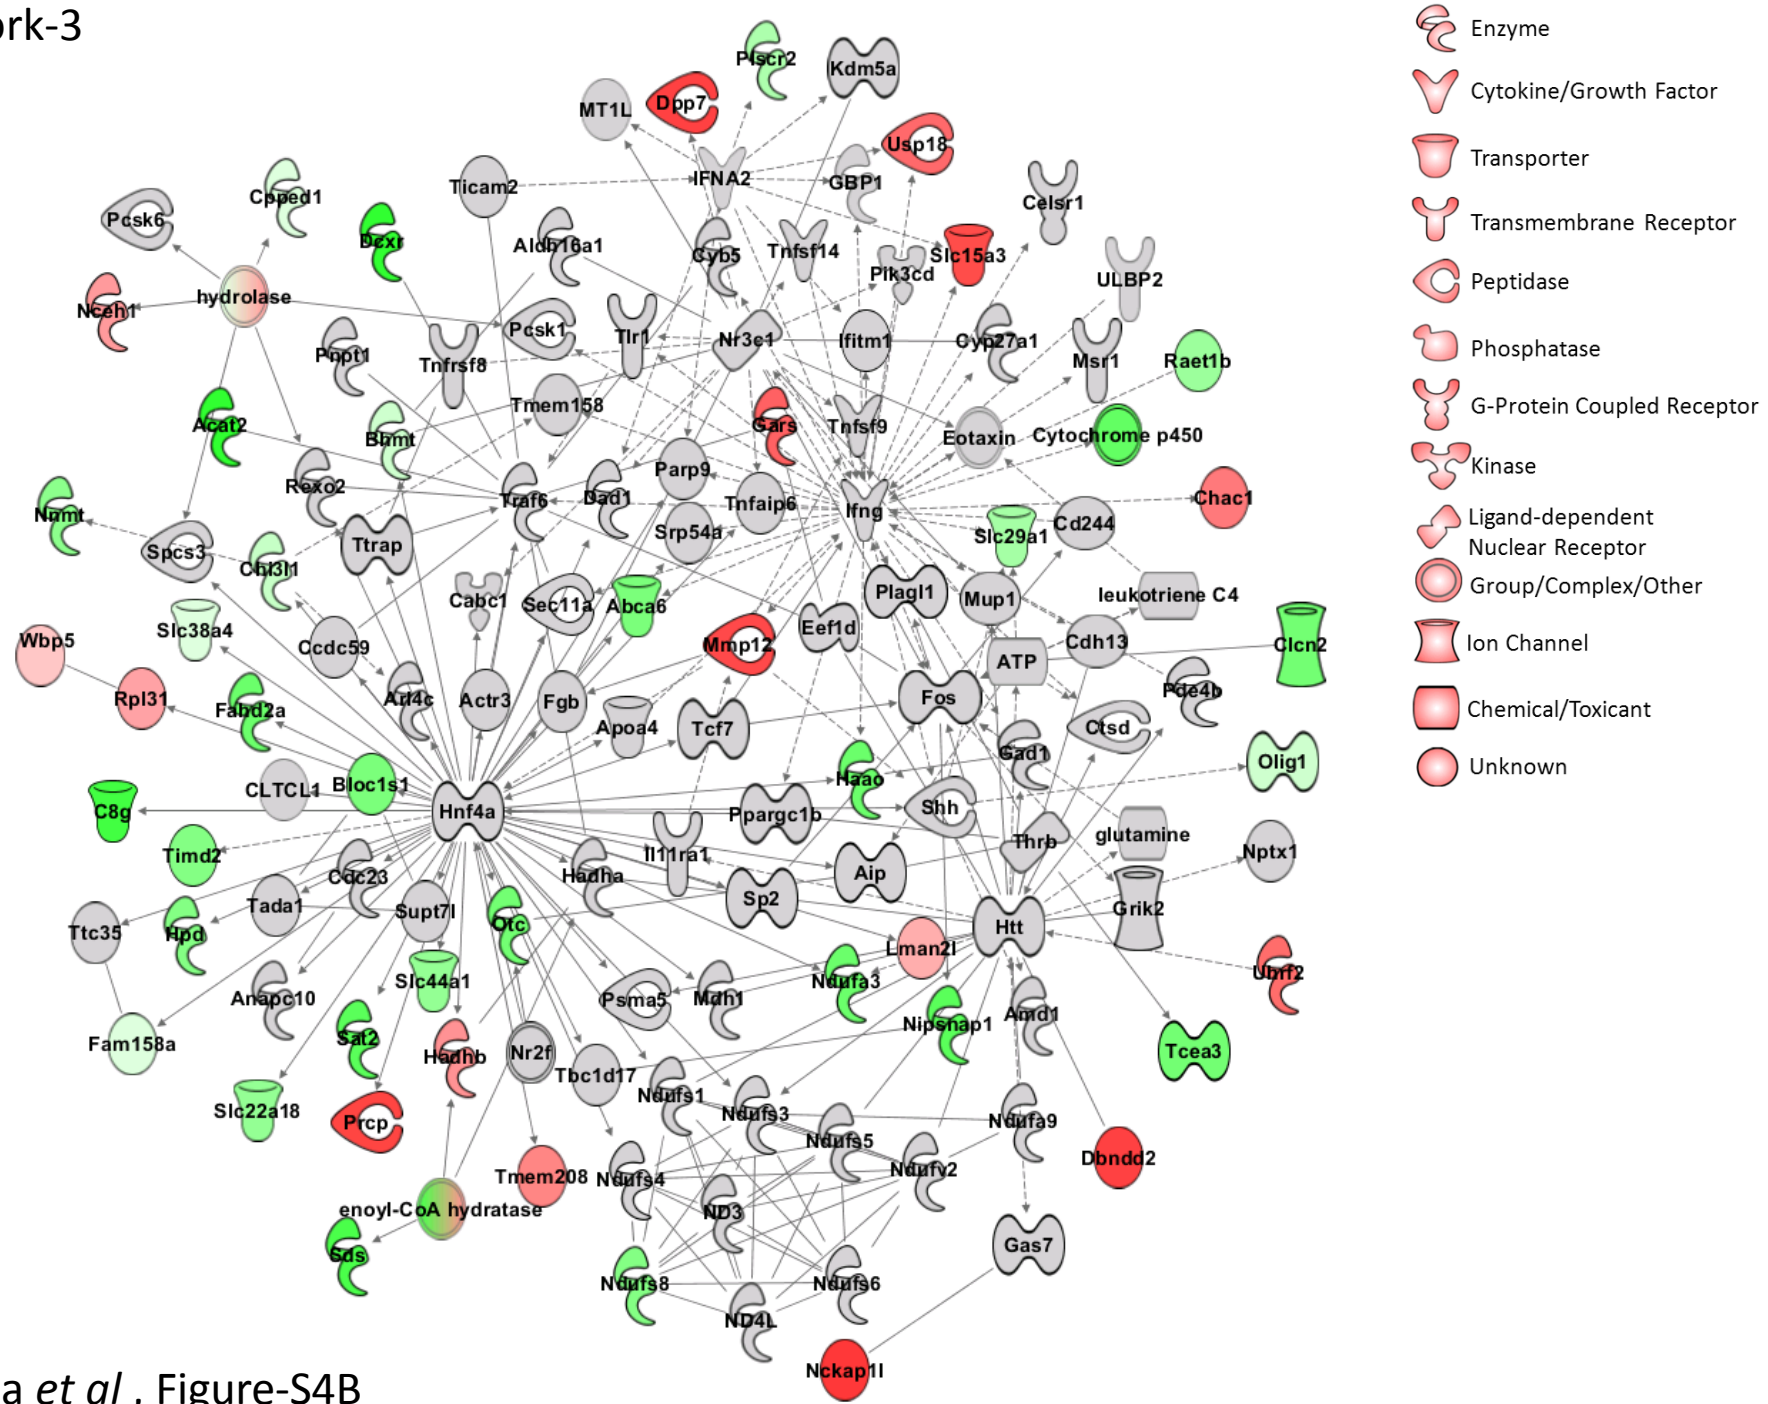

Sharma *et al* , Figure-S4B
